# Supplementary material for: NPAS4 in the medial prefrontal cortex mediates chronic social defeat stress-induced anhedonia-like behavior and reductions in excitatory synapses
Source: eLife. 2023 Feb 13;12:e75631. doi: 10.7554/eLife.75631 (PMC9925055; doi:10.7554/eLife.75631)
Supplement: Figure 1—figure supplement 1—source data 1. — Npas4 mRNA expression in the nucleus accumbens (NAc) after acute and chronic social defeat stress. [file elife-75631-fig1-figsupp1-data1.xlsx]

## Sheet: Sheet1
Source Data
Figure 1-Figure supplement 1A
Npas4 mRNA expression in NAc
Time	15 min				1h				24h
Experiment	Control	Stress			Control	Stress			Control	Stress
		Acute	Chronic			Acute	Chronic			Acute	Chronic
Data	1.12283	3.17534	2.48914		1.66854	0.644767	1.0621		0.579251	0.744388	1.38248
	1.34099	2.68157	1.92161		1.02673	0.858298	0.64866		1.11223	0.771316	0.608471
	1.25662	2.58037	1.82755		0.98572	0.817798	0.675386		1.12667	0.818049	1.05153
	0.629791	2.95825	2.89771		0.984309	0.523508	0.857029		1.70117	0.965575	1.01655
	0.793157	2.52103	1.87798		0.601624	0.628296	1.64481		0.809831		0.736365
	0.856611	2.97374	2.59934				1.37775				1.83752
		2.04643	2.19387				0.756459				0.871633
		2.48356	3.48095				1.30965				1.28298
			3.33915				1.00563				1.17524
			2.15892
