# Supplementary material for: NPAS4 in the medial prefrontal cortex mediates chronic social defeat stress-induced anhedonia-like behavior and reductions in excitatory synapses
Source: eLife. 2023 Feb 13;12:e75631. doi: 10.7554/eLife.75631 (PMC9925055; doi:10.7554/eLife.75631)
Supplement: Figure 1—figure supplement 1—source data 3. — NPAS4 signal intensity in the CaMKIIα-positive cells after acute and chronic social defeat stress. [file elife-75631-fig1-figsupp1-data3.xlsx]

## Sheet: Sheet1
Source Data
Figure 2B
NPAS4-protein signal intensity in CamKIIalpha-positive cells
Experiment	Control	Stress
		Acute	Chronic
NPAS4-protein signal intensity in CamKIIalpha-positive cells	1.61942	1.51102	0.932878
	0.80214	4.5993	1.05463
	2.50093	0.990785	2.37443
	0.445641	0.771977	1.82657
	0.559825	1.01151	1.14857
	0.561932	1.17717	2.72004
	0.5608	0.598211	0.940657
	1.52863	0.621078	1.05976
	1.57644	0.620012	0.607332
	0.941	0.898851	0.739669
	0.873456	1.17022	0.561576
	0.445058	1.92029	0.892608
	0.677145	0.941775	0.851645
	0.994563	1.21229	2.06061
	0.631706	0.652216	0.423338
	1.05091	1.43926	0.734461
	1.35498	0.569663	1.16885
	0.511893	0.746641	0.705338
	0.689216	2.70573	1.26482
	0.801894	3.31855	0.686066
	0.479388	1.01571	0.39689
	1.82477	1.01643	0.887074
	0.478794	4.02812	0.385581
	0.491545	0.746817	0.363779
	0.70603	0.708027	0.417633
	1.48355	2.82904	0.570769
	0.336121	0.871747	0.529766
	0.634814	0.642625	0.416293
	1.02698	1.16701	0.764359
	1.30087	3.06197	0.637875
	1.74654	1.08161	1.04308
	1.00712	1.98943	1.04837
	1.31857	2.89128	0.693126
	0.457755	0.778126	0.52605
	0.919947	0.902427	0.513221
	1.71871	0.625498	0.660942
	0.791892	2.62285	0.61516
	0.527812	0.633125	0.472752
	0.52666	0.868678	0.841078
	0.865063	0.850327	1.3642
	0.547338	1.3491	2.22073
	0.78457	0.831239	0.541237
	0.669271	1.84607	1.84998
	0.553961	1.7243	0.900321
	1.5461	3.15679	0.567444
		3.21988	0.894611
		1.34239	2.03004
		0.930453	0.357792
		1.47853	0.989556
		3.22501	0.418404
		0.859173	0.411892
		3.36433	1.05521
		2.96326	0.638854
		0.768825	2.00159
		1.70573	1.58371
		0.536278	0.885466
		0.473214	0.864465
		0.737014	0.936708
		1.98836	0.612581
		0.627747	0.462796
		1.2634	1.86943
		4.5204	1.14141
		0.792483	0.9836
		0.747621	0.485094
		0.47761	0.650404
		2.68272	0.72302
		1.817	2.93881
		0.802158	0.476457
		2.88687	0.639808
		2.19023	0.609295
		0.552029	2.77939
		3.94432	0.596972
		0.660697	0.482349
		2.1303	0.763237
		1.29829	0.754016
		2.56335	1.95432
		1.72789	1.89648
		1.09271	1.23128
		2.40603	1.87554
		0.770043	0.422665
		0.847407	2.46438
		1.4598	0.838055
		0.5065	0.528458
			2.12984
			0.687205
			1.57654
			0.888423
