# Supplementary material for: NPAS4 in the medial prefrontal cortex mediates chronic social defeat stress-induced anhedonia-like behavior and reductions in excitatory synapses
Source: eLife. 2023 Feb 13;12:e75631. doi: 10.7554/eLife.75631 (PMC9925055; doi:10.7554/eLife.75631)
Supplement: Figure 1—source data 1. — Npas4 mRNA expression in the medial prefrontal cortex (mPFC) after acute and chronic social defeat stress. [file elife-75631-fig1-data1.xlsx]

## Sheet: Sheet1
Source Data
Figure 1F
Npas4 mRNA expression
Time	5 min				15 min				1h				24h
Experiment	Control	Stress			Control	Stress			Control	Stress			Control	Stress
		Acute	Chronic			Acute	Chronic			Acute	Chronic			Acute	Chronic
Data	1.02875	4.07897	2.18523		1.37299	5.82879	2.87414		1.05796	1.03619	1.38239		1.05897	0.864138	0.878228
	0.833539	4.82472	2.16133		1.26193	4.26626	3.02199		0.910096	1.00806	0.638952		0.947808	0.773425	0.819415
	1.10642	2.26441	2.97765		1.12142	4.63809	2.82006		1.32601	0.995412	1.0111		0.91764	1.27692	0.693836
	1.03129	2.9559	2.76856		0.765819	4.86846	2.66006		1.12122	0.917311	1.02729		1.97611	0.956608	0.724973
	0.538867	2.38061	2.95892		0.949117	4.51464	4.03307		0.698566	0.748033	0.943943		0.549427	0.852241	0.451459
	1.83358	2.69073	2.09609		0.708076	4.47045	2.27815				0.943531				1.19969
	1.1106	4.63103	1.32523			3.26757	2.83019				1.09987				0.828936
	1.05555	4.76123	1.6239			3.98581	2.35534				0.752134				0.789676
	0.86334	2.34784	1.65252				3.01799								0.913409
			1.86348				2.37939
