# Supplementary material for: NPAS4 in the medial prefrontal cortex mediates chronic social defeat stress-induced anhedonia-like behavior and reductions in excitatory synapses
Source: eLife. 2023 Feb 13;12:e75631. doi: 10.7554/eLife.75631 (PMC9925055; doi:10.7554/eLife.75631)
Supplement: Figure 1—source data 3. — Number of NPAS4(+) cells in the medial prefrontal cortex (mPFC) in the CaMKIIα-positive or -negative cells after acute and chronic social defeat stress. [file elife-75631-fig1-data3.xlsx]

## Sheet: Sheet1
Source Data
Figure 1H
Number of NPAS4 protein-expression cells
CamKIIalpha	CamKIIalpha-positive cells				CamKIIalpha-negative cells
Experiment	Control	Stress			Control	Stress
		Acute	Chronic			Acute	Chronic
Data	0.2	2.55	1.4		0.2	0.3	0.4
	1.2	3.4	2.6		0	0	0
	1.6	1.8	5.8		0.2	0.8	0.2
	1	3.2	2.6		0.6	0.6	0.6
	1.56522	3.65217	6.95652		0.782609	1.56522	2.08696
	0	1.30435	5.11304		0.521739	0.652174	2.4
	0	3.65217	3.65217		0	1.69565	1.91304
	2.43478	2.21739	3.33913		0.869565	1.04348	0.417391
			2.08696				1.95652
			6.52174				0.782609
			1.04348				0
