# Supplementary material for: NPAS4 in the medial prefrontal cortex mediates chronic social defeat stress-induced anhedonia-like behavior and reductions in excitatory synapses
Source: eLife. 2023 Feb 13;12:e75631. doi: 10.7554/eLife.75631 (PMC9925055; doi:10.7554/eLife.75631)
Supplement: Figure 1—source data 4. — % of cellular marker expression in the NPAS4(+) cells in the medial prefrontal cortex (mPFC) after acute and chronic social defeat stress. [file elife-75631-fig1-data4.xlsx]

## Sheet: Sheet1
Source Data
Figure 1I
% of cellular marker expression in the NPAS4-positive cells
	CaMKIIalpha				SST				PV
Experiment	Control	Stress			Control	Stress			Control	Stress
		Acute	Chronic			Acute	Chronic			Acute	Chronic
Data	70.5882	62.2642	51.1111		0	0	0		0	0	4.7619
	67.4419	72.7273	62.5		0	0	0		0	0	0
	65.2174	62.7907	59.0909		0	0	0		0	0	5.55556
		65.3846	65.7895							0	0
	50	91.4286	70.9677
	100	100	88.8889
	91.6667	64.4444	100
	66.6667	80.5556	97.9167
			85.7143
