# Supplementary material for: NPAS4 in the medial prefrontal cortex mediates chronic social defeat stress-induced anhedonia-like behavior and reductions in excitatory synapses
Source: eLife. 2023 Feb 13;12:e75631. doi: 10.7554/eLife.75631 (PMC9925055; doi:10.7554/eLife.75631)
Supplement: Figure 2—figure supplement 1—source data 1. — Amount of liquid consumption (mL) in the sucrose preference assay. [file elife-75631-fig2-figsupp1-data1.xlsx]

## Sheet: Sheet1
Source Data
Figure 2-figure supplement 1
Liquid Consumption (mL)
Geno type	Water Consumption					Sucrose Consumption
Experiment	SC shRNA		Npas4 shRNA			SC shRNA		Npas4 shRNA
Interaction partner	Cont	CSDS	Cont	CSDS		Cont	CSDS	Cont	CSDS
Data	0.6875	1.3125	1.25	1		6.9375	5.625	6.25	7.58333
	1.5	1.6875	1.375	1		7.6875	4.125	5.75	6.5625
	1.0625	1.4375	2.3125	1.0625		6.5	5.125	6	7.75
	1.25	2.125	1.0625	1.0625		7.25	5.3125	6.375	7.5625
	1.75	2.5625	1.25	0.6875		10.3125	6.8125	6.75	8.5625
	1.1875	1.125	1.8125	1		6.4375	6.0625	7.75	7.5
	1.4375	1.4375	1.375	1.75		7.3125	6.5625	7.3125	6.75
	1.25	1.5625	1.1875	2		9.75	5.9375	6.9375	9
	1.05	1.4375	0.725	2.0625		4.725	6.1875	4.35	6.5625
	0.65	1.375	1.1	0.9375		3.675	4.9375	3.3	6.3125
	0.6	1.0625	0.5	1.875		5.375	8.4375	3.55	6.4375
		1.125	0.375	1.1875			6.5625	4.825	6.125
		1.75	0.65	0.875			5	2.875	6.4375
		1.4375	0.4	2.0625			5.875	4.425	7.25
		2.5		1.1875			7.0625		6.5
		1.375		1.25			7.375		5.75
		1.9375		1.3125			5.9375		7.5
		1.05		1.6875			4		6.4375
		1.5		0.45			4.8		4.45
		0.6		0.875			5.225		3.325
		0.6					5.325
		1.4					3.275
		0.45					4.425
		0.675					3.425
