# Supplementary material for: NPAS4 in the medial prefrontal cortex mediates chronic social defeat stress-induced anhedonia-like behavior and reductions in excitatory synapses
Source: eLife. 2023 Feb 13;12:e75631. doi: 10.7554/eLife.75631 (PMC9925055; doi:10.7554/eLife.75631)
Supplement: Figure 2—source data 1. — NPAS4 (+) cells/100 μm2. [file elife-75631-fig2-data1.xlsx]

## Sheet: Sheet1
Source Data
Figure 2B
NPAS4-protein positive cells/100 um^2
Experiment	SC shRNA	Npas4 shRNA
NPAS4-protein positive cells/100 um^2	1.85088	0.384671
	1.117	0.15721
	1.83395	0
	0.388329	0
