# Supplementary material for: NPAS4 in the medial prefrontal cortex mediates chronic social defeat stress-induced anhedonia-like behavior and reductions in excitatory synapses
Source: eLife. 2023 Feb 13;12:e75631. doi: 10.7554/eLife.75631 (PMC9925055; doi:10.7554/eLife.75631)
Supplement: Figure 2—source data 2. — Time spent in interaction zone (s) in the social interaction assay. [file elife-75631-fig2-data2.xlsx]

## Sheet: Sheet1
Source Data
Figure 2C
Time in social interaction zone (sec)
Geno type	SC shRNA					Npas4 shRNA
Experiment	Control		CSDS			Control		CSDS
Interaction partner	Absence	Presenece	Absence	Presenece		Absence	Presenece	Absence	Presenece
Data	142	237.9	78.7	123.7		106	151.6	13.5	11.6
	76.1	124.5	62.8	120.6		46.9	144.7	74.3	137.4
	100	150.8	64.7	90.9		118.1	137.8	48.4	92.1
	89.4	106.4	102.7	86		48.7	104	47.5	109.2
	70.7	135	105.3	26.9		88.8	150.9	51.5	11.9
	111.1	168.8	75.7	65.4		103.7	191.2	78.5	85.9
	61.1	101.9	71.6	135.1		54.6	141	89.8	69.7
	80.6	175.4	88.9	73.8		152	214.1	41	55
	65.1	118.6	68.6	131.8		41.9	90.4	35.1	62.7
	58.7	154.4	75.7	55.4		148.6	106.3	60.3	115.4
	87.5	191.1	102.1	127.3		44.7	154.4	107.1	131.7
	111	117.1	65.7	135.9		42.7	166.5	62.9	103.7
	120.1	168.4	59.6	43.6		78.8	123.2	123.8	163.9
	140.1	207.7	103.5	204.9		119.8	137.1	77.9	102.5
	127.6	217.5	86.1	151.9		118.6	116.9	65.2	134.4
	92	176.5	131.5	138.7		139.3	163.5	121.3	128.7
	153	177.1	108.2	98.1		100.5	171	76.1	93.5
	64.6	210.6	129	173.7		144.2	176	163.5	144.2
			89.5	135.3		91	149.7	112.2	183.7
			111.3	169.7				19.5	177
			124.1	90.2				94.8	104.8
			47.3	32.4				120.9	141.8
			93.9	241.6
			97.1	114.4
			144.2	166.2
