# Supplementary material for: NPAS4 in the medial prefrontal cortex mediates chronic social defeat stress-induced anhedonia-like behavior and reductions in excitatory synapses
Source: eLife. 2023 Feb 13;12:e75631. doi: 10.7554/eLife.75631 (PMC9925055; doi:10.7554/eLife.75631)
Supplement: Figure 2—source data 3. — Social interaction ratio in the social interaction assay. [file elife-75631-fig2-data3.xlsx]

## Sheet: Sheet1
Source Data
Figure 2D
Social interaction ratio
Geno type	SC shRNA		Npas4 shRNA
Experiment	Control	CSDS	Control	CSDS
Data	1.67535	1.57179	1.43019	0.859259
	1.63601	1.92038	3.08529	1.84926
	1.508	1.40495	1.16681	1.90289
	1.19016	0.83739	2.13552	2.29895
	1.90948	0.255461	1.69932	0.231068
	1.51935	0.863937	1.84378	1.09427
	1.66776	1.88687	2.58242	0.776169
	2.17618	0.830146	1.40855	1.34146
	1.82181	1.92128	2.15752	1.78632
	2.63032	0.731836	0.715343	1.91376
	2.184	1.24682	3.45414	1.22969
	1.05495	2.06849	3.8993	1.64865
	1.40216	0.731544	1.56345	1.32391
	1.48251	1.97971	1.14441	1.31579
	1.70455	1.76423	0.985666	2.06135
	1.91848	1.05475	1.17373	1.06101
	1.15752	0.906654	1.70149	1.22865
		1.34651	1.22053	0.881957
		1.51173	1.64505	1.63725
		1.52471		1.10549
		0.726833		1.17287
		0.684989
		2.57295
		1.17817
		1.15257
