# Supplementary material for: NPAS4 in the medial prefrontal cortex mediates chronic social defeat stress-induced anhedonia-like behavior and reductions in excitatory synapses
Source: eLife. 2023 Feb 13;12:e75631. doi: 10.7554/eLife.75631 (PMC9925055; doi:10.7554/eLife.75631)
Supplement: Figure 2—source data 4. — Time spent in avoidance corner zone (s) in the social interaction assay. [file elife-75631-fig2-data4.xlsx]

## Sheet: Sheet1
Source Data
Figure 2E
Time in social avoidance zone (sec)
Geno type	SC shRNA					Npas4 shRNA
Experiment	Control		CSDS			Control		CSDS
Interaction partner	Absence	Presenece	Absence	Presenece		Absence	Presenece	Absence	Presenece
Data	7.9	2.3	22.2	24.5		20	13.4	26.8	42.7
	19.7	22	48.5	60.4		40.4	19.3	18.8	7.4
	23.4	5.4	52.4	79.1		10	15.5	63.3	60.4
	14.8	11	16	50		28.6	14.5	19.7	70.4
	25.9	17.3	19.3	67.1		21.1	11.3	21.7	32.7
	28.4	18.1	30.7	39.8		26.1	2.3	33.6	76.5
	29.3	13.7	36.5	39.2		48.9	27.8	2.6	8.6
	15.6	10	17.5	41.4		14	4.3	87.6	66.1
	29.3	7.9	69.8	54		34.1	14.4	77.1	33
	20.9	4.2	14.3	14.3		21.2	15.3	31.1	16.5
	28.2	13.3	31.2	25.2		34.3	26.4	24	18.1
	19.8	3.4	15.3	47		16.9	4.3	12	7.5
	21.1	10.9	30.4	45		31.9	25.3	31.7	55.2
	35.7	8.9	58.8	51.3		14.8	9.2	18.5	11
	21.3	12.4	24.4	20.5		16.4	8.4	14.9	9.9
	20.3	8.3	12.1	7.4		14.6	7.9	27	67
			18.4	15.7		27.5	11.8	16.6	27.6
			23.7	14.5		17.7	16.6	25.2	17.4
			39.6	16.5		12.5	35	43.8	47.4
			17.2	19.6				30.7	13.8
			19.1	93.9				22.8	32
			74.1	1.9
			33.4	17.1
			21.8	15.4
