# Supplementary material for: NPAS4 in the medial prefrontal cortex mediates chronic social defeat stress-induced anhedonia-like behavior and reductions in excitatory synapses
Source: eLife. 2023 Feb 13;12:e75631. doi: 10.7554/eLife.75631 (PMC9925055; doi:10.7554/eLife.75631)
Supplement: Figure 2—source data 6. — Sucrose preference (%). [file elife-75631-fig2-data6.xlsx]

## Sheet: Sheet1
Source Data
Figure 2G
Sucrose Preference (%)
Geno type	SC shRNA		Npas4 shRNA
Experiment	Control	CSDS	Control	CSDS
Data	91.3636	81.1818	82.5156	90.1464
	83.9279	73.1044	82.5769	88.8545
	86.0202	78.9702	72.1552	87.2796
	85.1914	71.6728	85.6897	87.2341
	86.1349	75.1502	84.573	93.0128
	84.2659	84.8128	80.6442	88.5908
	82.51	81.7433	84.1993	79.9763
	89.0412	79.3899	85.8508	81.6404
	80.8556	80.424	85.9975	75.6356
	85.0526	80.9624	75.1305	88.8202
	90.2064	89.767	87.956	78.7965
		85.5565	91.5867	84.2857
		74.3862	92.9115	88.1258
		78.9213	81.4033	78.1692
		72.8898		84.9702
		84.8684		82.2998
		76.1572		85.0304
		79.0967		78.963
		76.164		91.0867
		89.0596		79.0343
		89.9816
		68.4905
		90.8532
		83.9445
