# Supplementary material for: NPAS4 in the medial prefrontal cortex mediates chronic social defeat stress-induced anhedonia-like behavior and reductions in excitatory synapses
Source: eLife. 2023 Feb 13;12:e75631. doi: 10.7554/eLife.75631 (PMC9925055; doi:10.7554/eLife.75631)
Supplement: Figure 2—source data 7. — Time spent in Opem Arm (s). [file elife-75631-fig2-data7.xlsx]

## Sheet: Sheet1
Source Data
Figure 2H
Open Arm (sec)
Geno type	SC shRNA		Npas4 shRNA
Experiment	Control	CSDS	Control	CSDS
Data	41.9	6	13	22.1
	42.5	9.8	7.1	29.9
	12	2.8	32.3	9.5
	10.3	24.8	18	20.3
	53.7	27.8	14.22	7.7
	16.2	2.3	43.3	3.7
	52.3	0	12.2	4.1
	11.6	49	32.4	3
	47.4	45.7	52.3	3.5
	0.6	9.7	56.3	5.4
	1.2	8	11.6	9.4
	8.9	19.8	29.1	3.1
	12.2	26	17.9	13.5
	17.8	2.4	21	11.9
	17.3	15.3		5.7
		21.7		21.1
		25.5
		5.6
