# Supplementary material for: NPAS4 in the medial prefrontal cortex mediates chronic social defeat stress-induced anhedonia-like behavior and reductions in excitatory synapses
Source: eLife. 2023 Feb 13;12:e75631. doi: 10.7554/eLife.75631 (PMC9925055; doi:10.7554/eLife.75631)
Supplement: Figure 3—source data 1. — Sucrose delivery in the sucrose self-administration. [file elife-75631-fig3-data1.xlsx]

## Sheet: Sheet1
Source Data
Figure 3A
Sucrose Delivery
Geno type		SC shRNA																Npas4 shRNA															SC shRNA
Experiment		Control																Control															CSDS
Data	Days in Fixed Ratio 1	32	42	26	37	44	61	33	32	35	65	29	36	54	16	26		40	10	22	38	59	35	58	50	31	72	60	29	24	16		59	61	64	70	64	46	87	59	34	38	86	45	52	46	14	34	10
	Days in Fixed Ratio 2	18	15	17	14	28	44	19	21	21	51	35	35	63	53	25		14	3	18	35	38	10	46	30	23	44	33	82	18	64		31	65	24	39	21	32	51	45	29	22	12	71	76	33	2	63	0
	Days in Fixed Ratio 3	35	15	21	18	39	42	47	30	66	50	70	73	106	50	60		33	38	35	41	66	23	12	18	46	53	53	70	40	58		65	54	31	25	27	19	56	46	64	113	71	115	92	78	26	125	16
	Days in Fixed Ratio 4	39	12	12	15	40	50	11	76	58	54	56	84	106	60	64		42	78	20	25	82	38	19	63	28	42	57	83	86	61		46	49	58	41	59	28	120	66	81	99	68	93	117	100	18	128	32
	Days in Fixed Ratio 5	29	32	11	47	33	54	29	86	69	71	81	53	110	51	66		44	52	37	43	58	70	31	89	48	55	52	56	118	77		39	83	57	49	47	58	130	79	73	51	75	79	97	80	22	86	56
	Days in Fixed Ratio 6	39	38	11	27	37	63	25	64	49	66	78	74	60	24	43		47	49	38	56	81	67	56	67	30	41	68	62	117	100		54	46	44	38	34	32	108	114	91	45	59	104	96	94	7	62	50
	Days in Fixed Ratio 7	57	31	18	30	30	53	47	83	44	74	58	59	83	43	36		47	58	33	34	85	71	28	59	40	39	72	103	64	118		45	65	59	30	45	55	98	115	76	46	55	61	86	91	13	57	40
	Days in Fixed Ratio 8	37	33	16	32	27	54	34	48	49	63	61	73	74	71	74		59	80	38	43	88	65	44	36	32	47	65	91	91	90		77	47	44	26	35	39	92	85	68	88	62	53	88	80	11	57	38
	Days in Fixed Ratio 9	33	41	19	34	28	61	37	79	77	54	90	78	58	68	86		47	63	54	63	85	55	55	39	36	45	72	96	92	123		65	54	44	19	31	49	102	88	61	52	66	52	97	79	20	59	60
[truncated: 17 more columns]
