# Supplementary material for: NPAS4 in the medial prefrontal cortex mediates chronic social defeat stress-induced anhedonia-like behavior and reductions in excitatory synapses
Source: eLife. 2023 Feb 13;12:e75631. doi: 10.7554/eLife.75631 (PMC9925055; doi:10.7554/eLife.75631)
Supplement: Figure 3—source data 2. — Discrimination index in the sucrose self-administration. [file elife-75631-fig3-data2.xlsx]

## Sheet: Sheet1
Source Data
Figure 3B
Discrimination Index
Geno type		SC shRNA																Npas4 shRNA															SC shRNA
Experiment		Control																Control															CSDS
Data	Days in Fixed Ratio 1	0.68254	0.693182	0.54717	0.53	0.521739	0.778626	0.495868	0.571429	0.740741	0.647436	0.5	0.6	0.752941	0.526316	0.710526		0.65625	0.140845	0.509091	0.780822	0.707317	0.587629	0.781065	0.586466	0.573171	0.882609	0.643275	0.64	0.528302	0.607143		SC shRNA	0.65	0.640523	0.782258	0.71831	0.675926	0.781421	0.676471	0.47619	0.495146	0.792135	0.571429	0.633028	0.838235	0.791667	0.608696	0.565217
	Days in Fixed Ratio 2	0.47619	0.484848	0.794872	0.513514	0.681319	0.808081	0.326087	0.657143	0.654545	0.898734	0.833333	0.8	0.923077	0.802469	0.717949		0.413793	0.1875	0.328358	0.783333	0.791209	0.350877	0.669421	0.47619	0.517241	0.848485	0.726027	0.748538	0.806452	0.95		0.732143	0.777778	0.888889	0.684932	0.510204	0.847826	0.720721	0.8	0.714286	0.578125	0.464286	0.8	0.685714	0.754098	0.5	0.829787	0
	Days in Fixed Ratio 3	0.918367	0.633333	0.8125	0.686275	0.805556	0.743119	0.794872	0.863636	0.896774	0.851485	0.940397	0.875	0.768116	0.955224	0.946809		0.68	0.824561	0.864407	0.85	0.898551	0.822222	0.580645	0.589744	0.706897	0.941176	0.85	0.704698	0.859155	0.841463		0.828571	0.814815	0.857143	0.557692	0.545455	0.807692	0.865079	0.741573	0.948276	0.760383	0.969697	0.898148	0.873418	0.852174	0.868421	0.886139	0.88
	Days in Fixed Ratio 4	0.782609	0.5	0.73913	0.681818	0.709677	0.792079	0.190476	0.90625	0.769231	0.953271	0.934579	0.880952	0.92236	0.898876	0.941748		0.847222	0.926471	0.885714	0.853659	0.809091	0.696078	0.645161	0.887097	0.482353	0.959677	0.93617	0.881081	0.861314	0.736364		0.762887	0.891566	0.95082	0.844828	0.93985	0.923077	0.930796	0.795455	0.896296	0.826667	0.933884	0.921212	0.813433	0.895425	1	0.947368	0.521739
	Days in Fixed Ratio 5	0.878049	0.785714	0.928571	0.836538	0.816901	0.917647	0.675	0.866667	0.763636	0.867816	0.890244	0.872093	0.800687	0.960526	0.965116		0.928571	0.9375	0.779661	0.852941	0.774194	0.778689	0.729167	0.839024	0.805825	0.89881	0.772727	0.80531	0.917949	0.846154		0.707317	0.812865	0.836735	0.8	0.723077	0.867257	0.928339	0.848739	0.928571	0.686957	0.942623	0.878261	0.723077	0.953271	0.977778	0.884892	0.761905
	Days in Fixed Ratio 6	0.911765	0.857143	1	0.862745	0.75	0.934066	0.575	0.91	0.51938	0.882353	0.712687	0.865546	0.839695	0.888889	0.935484		0.838235	0.906977	0.9375	0.968421	0.839506	0.864865	0.899083	0.736264	0.810345	0.877049	0.606936	0.830508	0.849462	0.94		0.849206	0.747253	0.807339	0.885714	0.7	0.811321	0.980315	0.816327	0.893491	0.7	0.946429	0.86747	0.720812	0.958678	0.909091	0.959596	0.8
	Days in Fixed Ratio 7	0.96732	0.833333	0.863636	0.906977	0.585714	0.925926	0.854545	0.92623	0.716049	0.931429	0.896	0.959459	0.918919	0.848485	0.961538		0.794872	0.986301	0.909091	0.877193	0.844595	0.843537	0.884615	0.668639	0.913043	0.878378	0.641791	0.930108	0.854167	0.955696		0.826087	0.871166	0.904459	0.847458	0.833333	0.868687	0.953271	0.837838	0.857143	0.722689	0.979798	0.939759	0.776398	0.985075	1	0.969697	0.782609
	Days in Fixed Ratio 8	0.896552	0.875	0.9	0.893617	0.434211	0.945205	0.685714	0.831461	0.792079	0.956204	0.902655	0.937063	0.938053	0.894737	0.981651		0.926316	0.84375	0.857143	0.794872	0.886463	0.861538	0.831683	0.675325	0.851852	0.925	0.643243	0.896774	0.899225	0.960317		0.877419	0.754717	0.705357	0.795455	0.9375	0.842857	0.912371	0.808219	0.808642	0.872549	0.921569	0.942857	0.760234	0.981982	0.807692	0.716312	0.777778
	Days in Fixed Ratio 9	0.90566	0.883333	0.862069	0.827586	0.602941	0.817204	0.789474	0.939655	0.809524	0.877551	0.916456	0.975207	0.826923	0.806723	0.953488		0.903226	0.907216	0.951389	0.891892	0.787879	0.857143	0.859649	0.85	0.701754	0.895349	0.501718	0.922619	0.88806	0.971591		0.825758	0.859649	0.601504	0.785714	0.77193	0.9375	0.949458	0.777778	0.637037	0.695652	0.829457	0.924242	0.878981	0.990741	0.714286	0.938144	0.84
[truncated: 17 more columns]
