# Supplementary material for: NPAS4 in the medial prefrontal cortex mediates chronic social defeat stress-induced anhedonia-like behavior and reductions in excitatory synapses
Source: eLife. 2023 Feb 13;12:e75631. doi: 10.7554/eLife.75631 (PMC9925055; doi:10.7554/eLife.75631)
Supplement: Figure 3—source data 3. — Breakpoint in the sucrose self-administration. [file elife-75631-fig3-data3.xlsx]

## Sheet: Sheet1
Source Data
Figure 3C
Breakpoint
Geno type	SC shRNA		Npas4 shRNA
Experiment	Control	CSDS	Control	CSDS
Data	25	32	32	145
	20	95	50	40
	6	50	62	25
	25	12	77	32
	32	25	40	95
	25	25	50	50
	20	95	25	95
	50	95	32	145
	145	50	62	95
	40	77	95	40
	77	77	118	20
	77	178	178	20
	40	40	178	95
	25	20		178
		12		77
		32		145
		77
		32
		77
