# Supplementary material for: NPAS4 in the medial prefrontal cortex mediates chronic social defeat stress-induced anhedonia-like behavior and reductions in excitatory synapses
Source: eLife. 2023 Feb 13;12:e75631. doi: 10.7554/eLife.75631 (PMC9925055; doi:10.7554/eLife.75631)
Supplement: Figure 3—source data 4. — Breakpoint of animals after chronic social defeat stress (CSDS) in the sucrose self-administration. [file elife-75631-fig3-data4.xlsx]

## Sheet: Sheet1
Source Data
Figure 3D
Breakpoint
Geno type	Susceptible		Resilience
Experiment	SC shRNA	Npas4 shRNA	SC shRNA	Npas4 shRNA
Data	12	145	32	40
	25	95	95	25
	25	95	50	32
	77		95	50
	12		95	145
			50	95
			77	40
			178	20
			40	20
			20	95
			32	178
			77	77
			32	145
			77
