# Supplementary material for: NPAS4 in the medial prefrontal cortex mediates chronic social defeat stress-induced anhedonia-like behavior and reductions in excitatory synapses
Source: eLife. 2023 Feb 13;12:e75631. doi: 10.7554/eLife.75631 (PMC9925055; doi:10.7554/eLife.75631)
Supplement: Figure 4—figure supplement 1—source data 1. — Spine head diameter. [file elife-75631-fig4-figsupp1-data1.xlsx]

## Sheet: Sheet1
Source Data
Figure 4-figure supplement 1
Spine head diameter
Geno type	SC shRNA		Npas4 shRNA
Experiment	Cont	CSDS	Cont	CSDS
Data	0.318696	0.241576	0.328747	0.290887
	0.321786	0.199724	0.196384	0.2638
	0.259675	0.247769	0.292854	0.292809
	0.358255	0.28196	0.225369	0.306648
	0.213052	0.269812	0.312202	0.274375
	0.20724	0.222678	0.229489	0.298179
	0.2225	0.174069	0.206311	0.301535
	0.251555	0.256597	0.251457	0.336874
	0.296401	0.258378	0.297313	0.322542
	0.25473	0.211206	0.247083	0.333093
	0.210883	0.237619	0.306936	0.355564
	0.247856	0.272956	0.233469	0.286788
	0.18565	0.339986	0.240471	0.303703
	0.218318	0.31711	0.206209	0.285987
	0.287411	0.321714	0.30139	0.26662
	0.247666	0.237826	0.312753	0.313253
	0.235192	0.241588	0.265252	0.15105
	0.18717	0.296677	0.2737	0.280215
	0.237142	0.214957	0.278227	0.215599
	0.307006	0.215405	0.265632	0.192816
	0.248814	0.255241	0.214745	0.169866
	0.246712	0.266459	0.287189	0.254924
	0.264733	0.198783	0.218731	0.171428
	0.266459	0.243238	0.311043	0.208729
	0.21631	0.258318	0.158159	0.264966
	0.240746	0.232735	0.19802	0.225247
	0.185685	0.277064	0.286261	0.244363
	0.280414	0.251312	0.282989	0.291032
	0.276657	0.355892	0.213337	0.308787
	0.263111	0.238546	0.227389	0.274606
	0.256135	0.238559	0.251968	0.228824
	0.251813	0.266221	0.262361	0.245205
	0.332486	0.315348	0.271769	0.199547
	0.275299	0.354172	0.226941	0.238353
		0.233067	0.296339	0.213619
		0.363346	0.229575	0.235322
		0.345622	0.270968	0.276974
		0.270282	0.319232
		0.273698	0.247768
		0.29523	0.322488
		0.282694
		0.266221
		0.204932
		0.306114
		0.181036
		0.278579
		0.284589
		0.190494
		0.2906
		0.280496
		0.162343
		0.264791
		0.29888
		0.306467
		0.268438
