# Supplementary material for: NPAS4 in the medial prefrontal cortex mediates chronic social defeat stress-induced anhedonia-like behavior and reductions in excitatory synapses
Source: eLife. 2023 Feb 13;12:e75631. doi: 10.7554/eLife.75631 (PMC9925055; doi:10.7554/eLife.75631)
Supplement: Figure 4—source data 1. — Dendritic spine density/μm. [file elife-75631-fig4-data1.xlsx]

## Sheet: Sheet1
Source Data
Figure 4B
Spines/mm
Geno type	SC shRNA		Npas4 shRNA
Experiment	Cont	CSDS	Cont	CSDS
Data	0.983241	0.302758	0.983791	0.913857
	1.33207	0.315046	1.04879	1.0463
	1.35013	0.367369	1.11466	1.8335
	1.42895	0.379084	1.784	2.22715
	0.702465	0.37974	2.42957	2.3292
	0.795276	0.741643	0.601889	0.836068
	0.981599	0.851516	0.772958	0.905
	1.31744	0.490415	1.36567	1.08002
	2.24719	0.717136	1.94869	1.10177
	0.829349	0.877032	2.01863	1.35622
	1.00568	0.949382	0.451359	1.4131
	1.05365	1.00221	0.989692	1.20373
	1.25233	0.619271	1.25867	1.46289
	1.36373	0.666972	1.09182	1.61276
	1.53348	1.00216	1.95052	1.86607
	1.63668	1.09252	1.99791	2.25529
	1.67667	1.16857	2.36593	1.00039
	1.70659	1.30365	0.920219	1.11034
	0.839939	1.35062	0.974682	1.4967
	0.961085	1.7177	1.13795	1.63719
	1.52215	1.91756	1.99692	1.68893
	2.29075	2.16687	0.637839	2.17543
	1.45824	0.159645	0.845722	0.99134
	1.52387	0.363553	0.902806	1.66016
	2.02503	0.402443	1.14584	1.7583
	3.20445	0.500346	1.2588	2.23539
	0.8142	0.566898	0.391467	0.731696
	0.957491	0.595323	0.626512	0.845587
	1.06613	0.770348	0.767715	1.02663
	1.29455	0.806738	1.03531	1.70649
	0.845431	1.27135	1.0446	1.23041
	0.849226	1.41904	1.18182	1.59004
	1.17071	0.438704	1.36016	1.94659
	1.8611	0.68106	1.58759	2.40279
		0.892929	1.71545	0.910841
		0.99569	1.1362	1.18097
		1.7423	1.48506	1.68747
		1.74888	2.20233
		1.97234	2.38047
		2.00982	2.44019
		0.292469
		0.321768
		0.807157
		0.87779
		0.922825
		1.08482
		1.52107
		1.76738
		0.84338
		0.924756
		0.974314
		0.982827
		1.03717
		1.31639
		1.67972
