# Supplementary material for: NPAS4 in the medial prefrontal cortex mediates chronic social defeat stress-induced anhedonia-like behavior and reductions in excitatory synapses
Source: eLife. 2023 Feb 13;12:e75631. doi: 10.7554/eLife.75631 (PMC9925055; doi:10.7554/eLife.75631)
Supplement: Figure 4—source data 2. — Inter-event interval (ms). [file elife-75631-fig4-data2.xlsx]

## Sheet: Sheet1
Source Data
Figure 4C
Inter-event interval (ms)
Experiment	Control			CSDS
Geno type	Mean	SD	N	Mean	SD	N
SC shRNA	911	1253	1237	1376	1733	1130
Npas4 shRNA	855.1	1788	648	966.7	1140	1240
