# Supplementary material for: NPAS4 in the medial prefrontal cortex mediates chronic social defeat stress-induced anhedonia-like behavior and reductions in excitatory synapses
Source: eLife. 2023 Feb 13;12:e75631. doi: 10.7554/eLife.75631 (PMC9925055; doi:10.7554/eLife.75631)
Supplement: Figure 4—source data 3. — Cumulative probability of inter-event interval (ms). [file elife-75631-fig4-data3.xlsx]

## Sheet: Sheet1
Source Data
Figure 4D
Inter-event interval (ms)
Geno type	SC shRNA			Npas4 shRNA
Experiment	Cont	CSDS		Cont	CSDS
Data	8.90039	7.40015		4.20312	11.85
	9.5	8.44922		4.39844	16.0508
	18.75	8.6001		6.19922	17.5
	19.0938	10.6016		6.60156	18.6016
	20	10.6499		7.64844	19.5488
	20.1992	12.6484		7.64844	20.1992
	20.6504	13.1484		8.10156	20.3
	20.6504	13.65		8.69922	20.8501
	20.6504	14.25		9.35156	23.25
	20.6504	14.3008		9.5	24.5
	20.6504	16.5		9.89844	24.5469
	20.6504	18.75		9.89844	25.2969
	20.6504	21.8477		10.1484	25.45
	20.6504	22.1502		10.1523	26
	20.6504	22.5		10.5977	26.3008
	20.6504	22.75		10.6953	26.8994
	20.6504	23.5		10.75	27.2969
	20.6504	23.5508		10.8008	27.6523
	20.6504	24		11.25	28.0508
	20.6504	24.0498		11.2969	28.8984
	20.6504	24.5499		11.75	29
	20.6504	26.5		12	31.55
	20.6504	29.1001		12.3008	31.8496
	20.6504	29.3003		12.6484	32.0999
	21.1	29.7969		13.5	32.5547
	21.5	30		14.25	34.3477
	22.75	31.0498		14.6953	36.2012
	23.8008	31.5508		14.9492	36.6484
	24.6997	31.8506		15.25	37.0508
	25	32		15.3008	38.5
	25.6016	32		15.9531	39
	25.8984	32.4492		17.0547	39.5508
	27.3516	32.8		17.0938	39.9453
	29.8516	33.1504		18.0469	40.35
	30.3984	35.1484		18.5	41.1504
	31.8047	35.1504		18.6992	42
	32.9004	35.3506		19.3984	42.6504
	33.0547	35.5		19.6484	42.75
	33.25	35.6484		19.8047	42.8516
	34.2002	36.3499		19.8984	43.0508
	34.2969	36.7988		19.8984	43.6016
	35.4531	40.1997		19.9492	43.75
	35.75	40.25		20	44.2999
	36.1016	42.3008		20.0996	44.3438
	37.2031	43.8999		20.25	45.2031
	38.3516	45.3047		20.25	48.1992
	39.1484	45.6001		20.6562	48.25
	41.1992	46.5		20.8438	48.4004
	41.3516	47.8		21.3516	50.1
	42.3516	49.2002		21.6992	50.6484
	43.0996	49.6992		21.8984	51.2969
	43.7012	50.2002		22.1992	51.3008
	43.75	50.4		22.25	52.2002
	46.1953	50.95		22.6016	53.4531
	46.7031	51.65		23.7031	54.5996
	47	51.8477		23.75	55.3008
	47.5508	51.9492		23.9492	55.3008
	48.7002	52.9		24	55.4502
	49.5	56.25		24.2031	56.7969
	50.75	57.5999		24.25	57.2001
	51.0469	60		24.8008	57.4531
	51.2001	60.0508		24.8984	59.8984
	52.1016	60.6953		24.9453	60
	52.25	61.2001		25	61.1016
	52.6992	61.25		25.0977	61.2969
	55.5	61.25		25.5	62.25
	56.6992	61.5		25.5	62.3516
	56.8477	65.6504		25.5469	62.75
	57.4531	66.0508		25.75	63.6504
	58.4492	67.25		26.8984	64.3008
	60.3516	67.5		26.9023	64.6992
	60.5938	69.1499		27	68.5
	60.6504	69.75		27.0977	69.5
	63.6953	69.8047		27.5469	69.6016
	63.7969	70.2988		27.7031	69.8516
	63.8008	70.6484		28.1484	70.5
	65	70.7988		28.4492	70.5
	65.1016	71.1001		28.8984	70.5977
	65.1504	71.1499		29.0508	70.7
	66.1016	71.8516		29.2031	70.9004
	66.25	72.6001		29.6992	71.6562
	66.3984	72.6016		29.9492	71.6992
	66.5508	72.9531		30.6016	72.3008
	66.75	73.3438		30.8516	72.7998
	67	73.3506		30.9453	73.25
	67.75	73.4497		31.0977	73.3008
	68.1523	73.5508		31.1016	74.3506
	68.4004	73.5508		31.2031	75
	68.9492	74.3999		31.25	75.25
	72.8516	75		31.4531	75.5
	73.0498	75.0996		31.9531	76.1001
	73.7998	75.25		32.25	76.6992
	74.5508	76.1523		33.5977	77.1484
	74.6484	77.8499		33.6953	77.8516
	75.0977	78.25		33.8008	78
	77.0508	80.0469		33.9453	78.25
	78.5508	81.25		34.25	79.1016
	78.9531	81.25		34.7969	79.5
	79	81.5		35	80.8984
	79.3047	82.8501		35.3999	81.6016
	79.5508	82.8984		35.4492	82.8008
	79.8984	83.1523		35.75	83.1484
	80.3516	83.9497		36.1016	83.1992
	80.3516	84.7001		36.4492	87.3516
	81	85.8516		36.75	87.6484
	81.2002	86.8501		36.8984	88
	81.6016	87.5		37.25	88.8496
	81.75	87.5		38.4492	90.4004
	82.0508	88.1992		38.5	90.8984
	82.4531	88.8496		38.6016	91.5547
	82.5498	89.25		38.6016	91.6016
	83.0996	89.35		38.8984	91.6016
	85.1016	89.8999		39.0508	91.6562
	85.25	91.7969		39.0977	91.9023
	85.5	91.9502		39.3516	92
	87.9531	91.9531		39.6016	92.2031
	88.1504	92.0999		40.4453	92.3047
	88.6523	92.6992		41.1523	96.8984
	88.75	94.2031		41.3984	97.2031
	89.5498	95.05		41.4023	97.6484
	90.5938	95.5547		41.5508	99.0977
	91.1484	95.75		41.75	99.1953
	91.25	96.1484		42.1499	99.4492
	93.5	96.3516		42.5	100.25
	94.4512	97.75		42.7969	100.949
	95.25	98.6484		42.8438	101
	96.1016	101.648		42.9531	101
	96.8984	103.648		43.5	101.047
	97.8499	105.25		43.9453	101.203
	98.4531	107.3		44.3516	102.1
	98.6992	107.301		44.6016	102.152
	100.949	107.65		44.8984	102.195
	101	108.602		45.1001	102.4
	101.051	113.352		46.3516	103
	101.051	114.149		46.6953	103.102
	101.402	114.5		46.9492	103.102
	103.297	115.195		47.8516	104
	104	116.953		48.25	105.094
	104.801	117.398		49	105.398
	105.102	117.906		49.0508	105.699
	105.547	118.6		49.9453	106.797
	107.25	119.449		50.1992	107.949
	108.297	119.602		50.3516	108.65
	110.047	119.65		50.4492	108.703
	110.098	120.4		50.6016	108.898
	110.148	120.648		50.7031	109.5
	110.398	121.094		51.1484	109.852
	111.75	123.05		51.7031	110.152
	111.902	124.445		51.75	110.406
	113.453	125.6		52.4453	111.102
	114.195	125.7		52.5508	111.148
	115.047	126.551		52.8516	111.152
	115.1	127.6		53.2031	111.898
	115.797	128.351		53.3516	112.852
	117.805	129.65		53.6016	115.102
	120.25	129.695		53.75	115.195
	121.699	130.2		53.8047	116.6
	122.547	130.203		53.8984	117.501
	124.402	130.648		54.6523	119.602
	125.051	131.102		54.8008	120.402
	126.297	131.2		55.1484	120.648
	126.5	131.25		56.5	121.15
	126.598	131.75		57.5508	122.152
	126.602	132.551		57.75	122.699
	126.898	132.844		58.3516	123.051
	128.398	133.05		58.8984	123.9
	128.5	133.15		59.0547	124.102
	129.199	133.8		59.6001	124.75
	129.852	134		60.25	125.648
	130	134.051		60.5547	126.6
	131.051	134.898		61.0508	127.301
	131.1	136.3		61.1992	129.25
	131.852	138.156		62.1016	129.5
	132.797	138.75		62.25	129.8
	132.898	139.203		62.3008	130.85
	135.75	139.652		63.25	131.1
	136.203	139.7		63.9062	131.102
	137.203	141.555		64.3	131.602
	137.352	142.5		64.3516	131.75
	137.398	144		64.3984	133.598
	137.5	144.051		65.0469	133.701
	137.602	147.5		65.5508	135.201
	138.551	147.75		65.5547	135.352
	138.75	148.6		66.3984	135.805
	140.102	150.406		66.3984	135.949
	140.945	150.701		66.5	136.1
	141.801	150.75		68.2031	136.852
	142.449	150.797		68.9023	137.547
	142.75	153.5		69.0508	138.547
	142.844	153.695		69.1484	138.547
	143.148	155.4		69.6016	138.75
	143.348	156.95		69.6992	139.047
	144.148	157.05		70.5469	139.797
	146.049	157.547		70.5508	140
	146.5	159.352		70.75	140.102
	147.398	159.449		71.1484	142
	147.4	159.5		71.3496	142.898
	147.5	160		72	143.5
	147.85	161.549		72	143.547
	148.953	163.648		73.4492	143.602
	149.949	165.402		73.6016	144.199
	150	165.45		73.6992	144.547
	150.7	165.85		73.8516	145.851
	151.203	171.551		74.6992	145.852
	152.25	171.85		75	146.398
	152.25	172		75.6484	147.2
	152.695	173.25		76.1953	147.699
	152.797	174.453		76.2031	147.852
	153.699	174.65		76.5	148.945
	154.352	174.951		79.2031	149.051
	155.199	176.6		79.3008	151
	155.299	177.398		79.3516	151.703
	155.95	179.801		80.4531	152.051
	156.65	181.55		81.1016	152.949
	156.805	184.305		81.5547	153.398
	157.352	185.15		82.0469	153.65
	157.594	185.699		82.5508	153.656
	157.598	187.648		82.5547	153.695
	158.5	188.15		82.75	153.852
	159	188.701		83.1484	154.703
	159.312	192.051		83.9023	157.75
	159.648	192.547		84.3008	158.852
	160.05	193.75		85.2998	159.5
	161.5	194.602		85.6953	159.648
	161.75	195.852		86.25	160.4
	162.199	196.047		88.1523	160.703
	163.898	196.844		88.5	166.148
	164.25	197.445		90.0488	167
	166.55	197.703		91.75	167.1
	167.453	197.801		92.5508	168.051
	168.05	200.5		93.3516	168.3
	168.051	200.648		93.3516	170.4
	168.102	200.75		93.8008	170.699
	168.102	201.898		94.9502	171.695
	168.797	202.797		95.8516	172.453
	169.25	204.203		95.8984	172.844
	169.551	206.695		96.1484	173.148
	169.699	209.102		96.1953	174.602
	170.797	210.5		96.6484	175.301
	171	211.352		98.3984	175.598
	171.203	211.4		98.6016	176.047
	171.9	213.344		98.8516	176.301
	172.102	213.547		99.2969	177.199
	172.602	214.148		99.9062	177.445
	172.602	214.7		100.656	178.5
	173.699	214.801		101.5	179
	174.805	218.398		101.5	179.102
	175.148	218.945		101.85	180.148
	175.898	220.75		102.898	180.852
	177.297	220.953		104.25	181.102
	177.598	221.301		104.801	181.5
	178.449	221.5		105.55	181.6
	182.5	221.75		105.898	181.75
	182.648	223.199		106.05	181.75
	182.898	223.305		107.25	181.844
	183.055	225.344		107.805	182.648
	183.102	225.55		109	182.699
	183.297	225.75		110.25	182.945
	183.551	227.152		110.352	183.4
	183.648	227.5		110.602	183.75
	183.703	228.85		111.102	184.098
	183.949	229.15		114.801	184.299
	187.348	231.102		116.594	184.344
	188.049	231.5		118.648	185.852
	188.148	233.049		120.445	185.949
	188.25	235		120.602	186.148
	189.797	236.6		121.25	188.453
	189.902	236.648		121.805	189.453
	190.101	238.844		122.65	190.5
	190.102	239.199		123.555	192
	190.402	239.95		124.301	192.148
	190.75	241.449		124.4	192.85
	192.55	243.15		124.797	192.95
	192.75	243.199		125.555	193
	193.695	243.953		131.852	193.449
	194.148	246.055		133.203	193.945
	194.4	252		136.4	193.951
	194.953	252.6		136.75	194.148
	195.75	252.805		140.699	194.703
	196.65	253.898		141.047	195.648
	197.301	253.898		144.75	196.449
	197.65	255.648		147.047	197.047
	197.699	255.75		147.453	198.098
	198.05	258.102		147.848	198.801
	198.25	258.445		148.699	199.348
	198.4	259.551		149.1	199.6
	200.449	260.051		149.449	200.352
	200.949	261.602		150.344	201.695
	201.1	262.049		150.898	202.602
	202.203	262.4		153.297	203.098
	202.398	265.65		153.398	204.852
	204.352	266.5		156.05	205.195
	204.5	269		157.1	206.051
	204.805	269.5		161.602	206.6
	204.898	270.055		163	209.05
	204.9	272.352		163.453	212.85
	207.9	272.75		165.199	213.2
	208.051	272.85		168.9	214.5
	208.547	274.25		170.352	215.445
	209.797	277.15		170.695	215.5
	211.148	281.805		170.852	215.555
	211.899	284.203		172.102	215.852
	212.299	285.551		172.805	216.05
	212.402	286.348		172.949	217.953
	213	288.352		174.699	218.199
	213.45	289.801		178	218.953
	213.547	290.297		178.898	219.35
	214.051	291.15		178.949	219.449
	214.352	292.148		180.148	220.902
	216.051	292.344		180.852	222.949
	216.852	292.602		182.453	223.402
	217.047	294.352		187.398	225.602
	217.9	295.301		187.656	226.055
	218.352	295.35		189.906	226.898
	219.301	297.898		190.051	227.805
	220.297	299.5		190.848	228.648
	220.4	300.203		194.3	229.25
	220.648	301.094		194.649	230.051
	220.898	301.5		195.051	230.5
	221.055	303.848		195.449	230.602
	221.5	303.906		196	231.5
	222.102	305.047		198.445	231.6
	222.305	305.203		201.9	232.199
	222.4	308.398		202.301	232.75
	222.95	309.15		203.805	232.801
	225.75	310.602		207.602	233.25
	226.301	312.094		210.801	233.75
	226.598	313		213.65	235.2
	227.4	315.398		215	235.5
	227.95	315.5		215.602	237.801
	228.25	315.703		216.9	239.6
	228.398	320.25		221.95	240.348
	228.555	322.25		223.648	241.102
	229.101	323.453		225.695	241.949
	229.609	323.648		227.348	243
	232.695	324.15		227.797	243.3
	233.797	324.602		228.648	243.648
	233.852	325.95		234.051	245.051
	234.352	328.551		234.35	246.75
	234.652	330.449		234.453	247.297
	237.25	334.5		237.898	247.352
	237.25	334.699		241.898	248.805
	237.453	335.453		243.549	249.098
	237.453	336.898		244.102	249.301
	239.547	337.25		245.398	249.5
	241.602	337.602		246.4	250.801
	241.797	338.898		252.5	251.551
	241.851	340.844		257.9	252.703
	242.547	341.047		258.5	253.949
	243.199	341.203		261.75	255.402
	243.648	343.051		263.4	256.602
	246.301	343.297		264.35	259.75
	246.949	343.852		265.102	262.2
	247.5	344.6		265.453	262.945
	247.75	345.5		267.05	263.348
	247.85	347.203		269.945	264.703
	248.152	348.953		270.148	266.9
	248.75	349.852		271.6	268.102
	249.898	349.949		272.148	268.801
	250.199	350.898		273.648	270.301
	250.75	351.148		280.148	270.75
	251	353		283.95	273.148
	251.051	354.352		284.95	273.25
	251.055	355.051		285.102	274.398
	253.25	360.203		285.297	275.344
	253.352	363.9		287	276.699
	254.199	364		292.301	277.449
	254.5	364.848		292.453	277.547
	255.75	364.9		299.352	277.898
	258.098	364.953		301.152	280.102
	258.75	366.945		304.75	280.75
	259.195	367.25		311.199	282.75
	259.5	369.4		313.949	286
	260.102	371.648		315.95	287.301
	260.352	376.195		316.049	289.5
	261.902	376.848		318.848	289.898
	262.148	381		319.047	290.199
	264.102	387.4		321.75	291.75
	266.352	388.549		323.25	292.148
	268.051	389.449		325.555	292.602
	268.648	390.406		326.551	293
	271.297	391.75		332.402	294.301
	272.1	392.398		332.953	296.1
	272.102	396.45		336.65	296.25
	272.75	396.5		337.699	299.049
	272.801	399.551		339.301	299.35
	272.949	403.5		340.85	300.352
	274.051	404.15		344.75	300.602
	275.305	406.148		347.5	304.05
	275.852	407.652		355.6	304.5
	280.352	409.148		367.594	304.555
	281.199	410.699		376.5	305.25
	281.305	411.398		378.301	305.898
	281.8	412.852		379.902	306.5
	281.951	414.652		382.703	307.102
	282	418.9		382.949	308.656
	283.148	420.406		383.047	309.047
	284.047	420.898		383.203	310.051
	284.445	422.352		386.449	311.102
	284.555	424.195		393.25	313.801
	286.199	424.75		396.801	314.055
	286.602	427.402		399.951	316.449
	287.602	429.047		403.199	316.898
	288.602	431.594		403.701	323.1
	289.297	435.195		405.25	327.5
	289.5	436.199		406.152	328.203
	291.6	437.95		410.547	328.852
	292.398	440.797		426.598	329.199
	293.55	442.699		427.7	330.051
	296.648	445		430.351	330.051
	297.449	445.055		431.148	331.051
	297.851	445.2		432.6	331.399
	298.352	445.352		432.75	332.945
	299.703	447.547		434.195	333.5
	300.602	448.348		437.15	333.695
	300.602	448.549		440.25	334.801
	302.25	451.449		441.75	335.801
	302.305	451.551		445.703	336
	302.45	451.7		450.699	337.305
	303.848	451.906		451.35	338.25
	304.301	452.102		455.9	338.4
	304.699	453.15		460.6	340.047
	304.906	457.547		462.9	340.801
	305.449	457.85		463.801	340.852
	306.102	458.594		468.35	340.945
	306.801	458.7		474.301	342.25
	307	459.449		482.098	347.95
	307.05	460.25		490.301	348.35
	307.641	461.85		501.051	348.701
	307.801	467.594		502.352	349.299
	308.199	478.301		503.75	349.602
	308.352	478.5		504.35	349.852
	310.203	481.5		505.551	350.5
	312.451	488.699		510.305	352.65
	312.656	493.148		514.703	354.799
	313.602	493.398		518.949	355
	314.25	495.352		524.398	355.451
	315.898	497.95		525.15	356.199
	316.699	498.203		532.75	359.398
	317.352	500.85		536.699	359.799
	317.9	500.9		538.551	361
	318.299	501.85		547.35	361.203
	318.5	504.75		548.352	362.35
	319.25	505.598		567.648	362.449
	319.898	508.102		568.453	364.047
	320.1	508.555		582.201	364.25
	320.35	508.844		582.45	364.5
	321.352	512.852		584.9	364.547
	321.5	514.148		592.602	365.25
	322.85	516.5		598.648	368.699
	324.05	516.602		600.848	369.047
	325.15	518.648		605.25	370.449
	325.5	519.297		605.898	371.055
	326.398	521.305		609	372.75
	327.148	526		615.65	374.25
	327.555	526.301		617.55	378.953
	328.297	527.852		618.449	379.047
	328.398	528.998		622.156	379.15
	328.703	530.75		628.9	379.297
	330.555	536.5		640.152	381.299
	331.102	538.398		644.051	381.35
	331.4	538.602		646.35	381.5
	331.898	541		655.601	383.148
	332.949	548.797		658.75	386.551
	333.551	553.75		661.551	386.844
	333.852	554.95		662.148	387.402
	334.195	556.7		666.85	388
	334.648	558.75		671.85	388.05
	335.348	559.25		680.598	389
	336.352	561.25		682.5	389
	336.648	562.602		683.5	389.051
	336.695	565.051		692.25	389.352
	338.547	565.453		696.7	391.047
	340.75	566.25		700.102	391.148
	341.148	567.2		710.551	393.648
	342.945	573.701		718.5	393.85
	343.047	575.25		720.25	394.75
	343.199	578.301		743.305	395.25
	344.098	580.453		747.05	398.5
	345.594	580.55		752.148	399.148
	348.148	581.598		755.203	399.398
	348.594	583.602		756.352	400.25
	348.85	583.648		763.148	403.102
	349.05	586.449		764.65	403.55
	350.602	587.602		770.047	404.051
	352.55	588.098		771.75	404.65
	355.549	596.203		783.852	405.656
	356.902	597		797.699	407.15
	360.102	597.898		800	408.148
	360.199	601.152		802.05	410.55
	364.699	603.406		810.5	412.348
	365.551	606.148		816.9	413.098
	368.602	606.15		840.398	414.1
	368.8	606.5		843.102	414.352
	369.297	616.25		846.152	416.398
	369.75	616.352		855.299	418.649
	370.299	618.551		856.549	424.5
	370.449	623.047		866.547	424.801
	375.953	623.5		880.15	425.25
	376.203	624.65		892.648	426.25
	378.652	625		919.949	426.953
	379.55	627		929.352	427.148
	379.949	627.898		938	427.75
	381.25	629		943.35	427.898
	382.5	629.102		944.6	437.15
	382.75	629.953		946.801	438.598
	383.4	630.75		949.25	440.047
	383.75	634.195		955.445	441
	385.602	634.805		958.602	442.648
	387.555	635.102		965.648	446.852
	388.551	637.6		1011.6	448.051
	389.648	639		1016.9	449.199
	389.801	639.699		1027.75	450.25
	389.906	642.047		1038.9	451.949
	390.201	642.695		1053.2	452.6
	390.6	645.797		1065.05	453.5
	393.844	646.199		1083.45	454
	394.094	661.055		1083.75	457.7
	394.5	668.398		1098.95	458.45
	394.801	670.45		1105.8	458.852
	399.6	671		1109.85	459
	400.35	674		1121.25	459.199
	402.15	674.445		1162.4	459.898
	402.203	680.398		1163	460.25
	402.449	686.297		1185.05	460.8
	404.148	688		1188.19	460.801
	407.199	694.406		1207.4	463.297
	409.898	697.203		1223.7	468.344
	409.898	697.25		1231.4	472.102
	413.551	699.648		1232.75	474.5
	415.1	701.055		1248.05	475.051
	415.449	703.5		1251.75	475.25
	416.391	712.602		1259.7	476.602
	417.1	713.047		1261.2	477.301
	417.301	717.1		1274.75	480.951
	422.852	717.551		1276.85	481.047
	422.949	718.75		1304.75	481.199
	424.051	718.797		1318.2	481.949
	425.344	721.75		1341.3	483.801
	427.199	725.199		1384.1	484.299
	427.203	726		1398.45	485.45
	427.25	726.898		1402	486.402
	428.398	735.055		1413.95	486.602
	429.449	735.449		1426.15	488.148
	429.951	735.801		1439.45	488.602
	430.4	738.047		1463	489.25
	432.547	740.898		1470.05	490.102
	433.398	741.602		1496.7	490.844
	433.602	747.25		1501.4	491.5
	434.898	747.902		1519.15	492.899
	435.25	748.953		1529.85	496.25
	438.199	749.199		1541.8	497.301
	439.5	750.051		1572.15	498.25
	439.953	753.25		1581.9	500.051
	440	754.051		1591.5	500.5
	440.5	757.301		1614.75	503.699
	440.547	757.453		1627.35	505.199
	442.1	758.648		1663.8	506.301
	442.25	758.699		1688.94	508.699
	442.801	759.348		1709.05	513.699
	443.75	760.75		1728.1	517.602
	443.898	763.703		1731.55	521.1
	444.695	766		1822.55	521.549
	444.898	767.352		1831.9	523.05
	448.85	769.951		1855.55	523.297
	448.949	774.102		1863.65	523.598
	449.398	779.299		1879.95	524.906
	449.951	779.547		1893.6	526.203
	450.148	786.25		1952.15	526.352
	451.35	795.9		1995.6	532.398
	451.5	797.047		1996.19	533.602
	454.398	800.95		2024.95	537.445
	454.45	802.75		2027.2	537.848
	455.25	803.75		2035.35	538.75
	455.398	805.149		2037.1	544.35
	455.406	805.402		2044.1	546.852
	456	805.805		2052.15	552.35
	459.348	806.45		2091.35	553.902
	460.551	808.398		2116.55	556.199
	461.551	810.15		2151.45	556.453
	464.098	811.5		2178.65	556.951
	464.15	818.148		2246.45	557.451
	464.902	823.656		2273.35	558.305
	467.953	824.547		2284.9	565.45
	469.398	826.15		2290.35	567.852
	470.3	830.297		2329.41	569.148
	470.851	835.055		2340.55	569.898
	473.797	835.203		2386.6	573.6
	474.898	835.445		2395.5	575.2
	477.699	836.555		2404.15	575.25
	480.797	838.898		2437.8	575.453
	485.852	839.75		2438.9	576.598
	486.602	841.047		2469.1	577.594
	487.148	841.555		2470.9	578.453
	487.648	843.199		2481.5	578.799
	488.301	846.25		2489.9	579.75
	491.398	856.5		2504.8	580.406
	493.25	859.949		2505.4	581.551
	496.102	861.805		2722.45	582.098
	498.051	864.797		2794.45	582.449
	499.801	869.102		2827.85	582.602
	499.949	869.406		2859.65	583.648
	500.449	875.15		2938.75	584.453
	500.55	879.5		2997.55	585.2
	500.852	879.65		3138.35	586.4
	501.141	880.797		3200.25	589.602
	509	881.598		3246.6	590.555
	510.699	881.75		3277.9	593.555
	516.648	885.195		3285.1	594.95
	517.805	891		3338	597.047
	519.5	893.25		3345.4	599.199
	520.453	896.5		3360.45	599.55
	523.453	899.05		3375.7	600.25
	525.102	899.648		3402.9	600.801
	527.149	902.4		3422.5	600.85
	529.102	905.551		3448.95	602.5
	529.703	908.65		3529.5	606.25
	530.148	912.555		3633.8	607.203
	530.656	914		3731.95	608.703
	533.25	917.902		3751.45	610.398
	533.398	919.85		3775.65	611.25
	534.1	925.547		3784.85	611.852
	534.701	928.203		3875.45	612.652
	535.398	929.801		4089.25	614.051
	536.1	930.148		4505.4	615.352
	536.648	931.25		4548.41	616.25
	538.25	933.75		4582	616.305
	540.25	938.445		5116.81	619.652
	542.25	938.699		5443.25	622.25
	543.25	945.7		5695.65	622.75
	544.602	949.2		5944	623.098
	544.797	954.953		5969.4	625.648
	545.297	957.15		7162.6	626.25
	547.4	958.352		7492.95	626.398
	550.102	958.85		7521	626.949
	551.102	959.101		8471.2	628
	553.102	964.299		8523.3	630.551
	556.6	965.852		9712.69	632.25
	556.848	973.398		9875.9	632.348
	558.352	976.75		10140.6	633.953
	558.75	984.699		10371.8	637.453
	561.4	989.102		10800.6	637.902
	564.703	992.848		11280.5	638.75
	565.805	994.852		11296	638.85
	566.844	995.352		11400.1	639.699
	568.602	996		11947.2	639.797
	569.602	998.453		12570	643.75
	569.699	1000.6		13676.3	647.148
	572.949	1001.2			647.6
	575.398	1003.7			647.844
	576.1	1003.85			649.8
	578.75	1004.15			649.801
	578.844	1004.35			650.1
	580	1005.05			653.2
	583.953	1007.55			653.852
	584	1014.95			655.6
	584.9	1015.25			656
	586.399	1017.8			656.85
	586.551	1018.8			657.398
	587.25	1019.95			657.805
	587.5	1020.15			660.449
	589.85	1021.55			661.85
	591.4	1022.95			662.801
	591.648	1023.55			663.551
	591.9	1028.3			665.949
	591.949	1031.6			674.75
	593.25	1035.35			677.453
	594.5	1036.2			682.9
	597.949	1040.65			683.102
	600.25	1044.45			683.305
	601.5	1048.15			683.953
	601.648	1055			685.301
	602	1055.15			686.15
	602.051	1055.55			687
	602.6	1055.75			692.851
	605.602	1058.85			702
	607.398	1063.8			706
	607.55	1071.55			706.652
	610.953	1074.6			708.102
	612.648	1077.95			710.352
	615.695	1078.25			714.598
	617.199	1078.35			718.848
	619.2	1079.55			720.852
	619.5	1082.5			722.3
	620.047	1082.7			723.547
	620.352	1083.9			725
	621.199	1085.45			725.352
	625.152	1085.6			725.852
	625.75	1086.34			729.25
	628.35	1091.65			729.5
	628.898	1092			729.898
	629.75	1096.15			731.051
	629.797	1097.91			736.703
	630.15	1101.34			736.801
	630.695	1105.2			737.25
	630.852	1109.65			740.699
	633.949	1112.19			741
	634.6	1114.1			741.75
	635.449	1117.65			742.102
	636.953	1117.7			742.648
	637.402	1118.56			743.5
	639.648	1119			744.398
	641.3	1119.85			744.945
	641.951	1124.95			746.797
	643.352	1134.65			746.902
	644	1140.3			747.451
	644.797	1142.45			750
	645.701	1143.95			751.25
	650.648	1144.6			757.85
	651.051	1151.75			758.301
	654.549	1152.05			763.15
	655.6	1154.1			764.55
	655.797	1156.55			765.102
	656.15	1157.25			766.699
	657.35	1160.05			767.35
	659.051	1160.45			768.648
	659.102	1161.6			768.75
	666.05	1162.25			771.648
	667.797	1163.7			771.699
	668.051	1168.85			777.4
	668.25	1171.75			777.5
	670.5	1174.2			777.852
	671.953	1178.8			778.352
	677.305	1179.8			778.5
	677.801	1179.9			782.25
	682.852	1185.2			782.7
	684.45	1188.9			785.156
	689	1197.91			785.55
	690.15	1201.95			785.695
	690.648	1203.35			787.051
	691.949	1203.7			789.305
	692.85	1204.81			791.648
	693.199	1206.6			793.7
	693.449	1209.9			793.805
	696.549	1210.94			794.449
	697.35	1211.8			794.648
	700.297	1214.85			796.501
	705.297	1215.9			797.352
	705.805	1218.05			797.445
	711.4	1218.8			797.699
	711.551	1219.75			799.199
	716.55	1220.59			800.25
	717.098	1222.94			809.305
	717.148	1226.05			809.547
	717.703	1228.3			810.148
	723.6	1238.65			813.195
	726.602	1240.55			813.75
	726.797	1240.85			814.25
	726.805	1245.75			816.652
	727.301	1248.8			816.75
	727.898	1249.85			818.398
	729.547	1250.55			820.801
	731.4	1250.7			821.051
	733.098	1255.05			826
	736.109	1262.1			829.25
	736.5	1262.95			829.352
	738.25	1270.9			833.301
	741.5	1271.1			835.5
	741.906	1271.1			835.5
	742.699	1285.95			839.7
	743.297	1289.85			840.102
	744.047	1291.95			840.25
	745.305	1294.5			843.652
	746.051	1294.59			844.648
	747.898	1294.6			845.1
	753.449	1298.66			851.649
	753.898	1299.5			856.75
	758.848	1300.4			857
	761.799	1300.55			858.547
	761.953	1301.05			861.65
	762.199	1301.8			863.648
	764.148	1307.65			863.75
	764.85	1309.7			864.402
	766.451	1312.75			865.55
	766.652	1315.7			865.648
	766.703	1318.65			868.4
	767.703	1318.75			868.648
	768.102	1321.35			871.05
	768.305	1322			871.051
	770.047	1322.16			871.305
	772.051	1322.7			872.352
	772.799	1324.9			875.102
	773	1330.16			876.7
	774.852	1332.5			877.75
	779.699	1332.85			880.051
	781.344	1348.35			880.953
	781.652	1349.2			881.352
	784.35	1355.1			883.297
	785.551	1361.6			886.051
	786.898	1362.55			888
	787.141	1365.55			888.4
	787.55	1366.25			891.35
	789.398	1371.9			891.352
	790.649	1373.75			892.25
	792.945	1384.7			897.5
	793.602	1388			897.906
	795.75	1400.2			898.695
	795.801	1405.3			899
	796.152	1405.6			899.25
	797.148	1406.55			900.547
	799.051	1408.25			903.3
	799.852	1415.25			903.801
	800.3	1415.59			905.2
	800.5	1416.55			905.352
	800.549	1420			905.703
	803.699	1429.3			907.152
	804	1431.9			909.65
	806.549	1445.9			912.055
	806.949	1454.6			913.047
	811.25	1459.5			916.398
	812.199	1467.6			918.797
	812.449	1484.55			918.9
	815.047	1485.05			921.4
	816.6	1485.95			927.851
	817.852	1487.6			928.949
	818.55	1494.8			934.305
	820.352	1498.25			936.148
	820.602	1509.2			938.549
	828.301	1510.45			939.949
	831	1512.85			949.75
	834.602	1514			949.898
	834.75	1530.45			951.148
	835.297	1543.6			953.152
	837.35	1548.9			955.148
	837.398	1552.75			958.051
	842.602	1553.45			959.398
	842.852	1556.15			960
	843.699	1562.6			960.648
	844	1576			964.699
	847.602	1587.1			965.75
	847.703	1590.16			966.801
	848.35	1601.35			970.453
	848.398	1603.7			983.85
	848.75	1609.95			986.5
	849.297	1612.15			987.5
	850.449	1613.4			987.602
	854.352	1618.45			989.301
	855.555	1620.3			999.15
	856.5	1624.75			1001.95
	860.648	1624.85			1004.1
	861.453	1625.91			1008.85
	862.75	1629.8			1012.7
	866.699	1633.5			1013.05
	868.098	1643.1			1013.7
	868.25	1644.8			1014.25
	868.75	1674.35			1019.2
	870.9	1677.5			1024.19
	872.102	1679.55			1026.06
	873.1	1687.55			1027.35
	873.398	1703.95			1029.9
	875.203	1709.45			1031.45
	875.602	1718.85			1040.95
	883.305	1739.85			1045.1
	885.805	1758.25			1045.25
	886.551	1759.95			1046.9
	887.199	1773.1			1050.05
	892.648	1777.1			1052.95
	892.851	1782.55			1055.65
	894.848	1790			1056
	896.902	1792.45			1057.6
	899.402	1793.7			1067.7
	903.102	1795.55			1068
	904.551	1796.4			1085.25
	905.898	1798			1085.4
	907.648	1801.5			1086.1
	910.648	1834.9			1087.4
	910.703	1842.6			1088.65
	911.352	1877.35			1091.2
	911.848	1879.75			1091.8
	912.547	1888.65			1094.35
	914.453	1889.25			1100.8
	915.695	1912.25			1109.8
	915.812	1914.05			1110.55
	919.25	1916.6			1115.1
	925.3	1921.85			1115.55
	925.852	1930.8			1116.25
	926	1946.05			1116.35
	927.402	1952.9			1118.2
	928.848	1954.65			1122.65
	932.699	1960			1123.1
	932.859	1981.25			1125
	937.352	1995.85			1125.7
	939	1995.85			1126.7
	942	1997.75			1126.75
	943.902	2012.3			1128.1
	946.547	2013.25			1132.3
	947.5	2017.5			1133.25
	959.453	2022.4			1140.7
	963.551	2034.65			1141.8
	967.449	2051.05			1146.15
	971.703	2054			1147.75
	973.844	2055.45			1158.85
	977.555	2064			1159.95
	977.949	2071.35			1161.4
	978.85	2083.45			1167.4
	982.695	2091.6			1167.5
	983.699	2092.8			1167.7
	985.852	2106.95			1171.85
	986.5	2111.45			1174.35
	990.898	2113.6			1179.2
	991.797	2113.9			1181.4
	993.555	2123.9			1183.5
	995	2126.8			1185.45
	999.65	2130.75			1186
	1004.2	2133			1186.35
	1005.1	2138.85			1203.8
	1007.05	2139.1			1205.7
	1009.95	2155.3			1212.2
	1017.4	2157.9			1218.5
	1021.25	2165.85			1219.8
	1024.5	2171.45			1222.75
	1025.1	2171.8			1224.15
	1025.25	2194.4			1224.25
	1040.75	2194.55			1229.15
	1043.4	2203.15			1231.6
	1050.15	2208.05			1251.15
	1050.5	2211.5			1251.9
	1052.1	2215.95			1253.75
	1053.1	2221.7			1258.15
	1053.85	2249.1			1265.15
	1055.65	2253.85			1266
	1055.9	2266.05			1266.65
	1065.6	2293.05			1268.85
	1071.15	2306.8			1276.75
	1072.15	2314.85			1278
	1073.75	2318.2			1288.75
	1075.05	2329.75			1289.85
	1076.7	2333.6			1290.19
	1078.9	2348.4			1297.5
	1079.31	2348.45			1302.2
	1081.44	2356.4			1304.45
	1082.3	2371.65			1306.7
	1082.45	2372.4			1307.05
	1095.7	2376.45			1310.3
	1096.45	2380.95			1311.35
	1098.94	2398.05			1316.4
	1100.95	2399.65			1317.45
	1103.94	2418.25			1319
	1107.3	2421.95			1320.35
	1110	2429.65			1321.75
	1114.3	2446.6			1323
	1115.3	2452			1325.4
	1116.45	2455.15			1325.75
	1123.85	2459.95			1327.85
	1126.15	2470.35			1333.65
	1136.1	2489.4			1342.75
	1136.3	2497.65			1343.4
	1147.25	2499.15			1344
	1148.35	2519.15			1346.25
	1154.25	2534.3			1356.65
	1168.85	2536			1364.15
	1171.65	2536.95			1364.15
	1171.69	2544.6			1364.55
	1172.75	2618.25			1366.7
	1185.4	2624.35			1368.6
	1186.4	2630.55			1370.55
	1188.2	2644.45			1371.6
	1189.25	2653.8			1372.25
	1192.15	2673.2			1373.35
	1193.45	2674.3			1374.8
	1194.2	2689.15			1384.05
	1194.25	2691.7			1392.15
	1194.45	2697			1393.05
	1197.9	2713.8			1394.4
	1198	2722.9			1394.55
	1212.3	2725.2			1394.9
	1213.5	2730.55			1395.25
	1215.25	2745			1395.7
	1216.1	2751.55			1396.25
	1217.35	2765.6			1401.35
	1225.2	2793.5			1401.35
	1225.55	2805.95			1412.05
	1229.05	2818.5			1413.6
	1231.15	2829.15			1420.1
	1242	2842.95			1429.05
	1246.8	2846.2			1429.65
	1248.25	2849			1431.25
	1250.15	2858.95			1431.4
	1255.75	2886.5			1432.6
	1260.56	2889.9			1432.7
	1264.75	2892.75			1434.45
	1272.85	2893.66			1435.5
	1274.6	2896.2			1438.1
	1280.65	2916.16			1439.8
	1281.3	2947.25			1440.9
	1282.35	2962.4			1444.6
	1284.1	3011.3			1446
	1284.45	3015.7			1448.7
	1303.35	3037.75			1449.55
	1306.4	3067.3			1449.56
	1309.3	3073.4			1449.7
	1316.1	3074.55			1460.15
	1327	3075.5			1466.4
	1328.35	3100.05			1467
	1341	3105.7			1474.56
	1356.05	3141.9			1484.85
	1361.25	3159.7			1487.55
	1361.75	3174.2			1487.55
	1371.9	3183.91			1491.81
	1373.15	3192.9			1511.4
	1381.8	3235.1			1517
	1390	3246.25			1517.8
	1398.81	3314.85			1518
	1399.05	3357.15			1520.5
	1416.75	3359.15			1528.31
	1417.5	3381.25			1541.25
	1419.2	3385			1553.3
	1425.85	3389.7			1556.85
	1435.5	3406.95			1561.4
	1435.95	3442.45			1563.06
	1440.2	3449.75			1568.15
	1445.45	3470.9			1578.55
	1445.75	3471.7			1581.15
	1447.45	3472.75			1582.4
	1448.5	3492.05			1584.1
	1461.2	3528.5			1589.6
	1465.95	3545.85			1589.8
	1466.35	3549.95			1600.25
	1467.05	3558.7			1600.55
	1487	3561.7			1608.7
	1489.3	3568.09			1615.8
	1491.2	3581.1			1622.8
	1495.1	3596.7			1625.05
	1511.19	3661.35			1631.3
	1511.6	3689.25			1635.7
	1515.15	3695.95			1637.25
	1515.35	3742.45			1637.65
	1516.25	3744.9			1655.25
	1529.45	3750.65			1661.25
	1530.95	3801.3			1664.1
	1539.25	3835.2			1666.16
	1544.8	3862.95			1669.65
	1545.75	3930.7			1689.8
	1549.55	3950.4			1690.6
	1550.45	3968.1			1708.1
	1561.1	4040.8			1708.44
	1563	4070.4			1709.4
	1567.65	4090.6			1710.45
	1567.95	4116.45			1725.9
	1579.45	4123.9			1726.75
	1580.06	4126.05			1728
	1583	4142.75			1743.7
	1585.5	4154.95			1756.75
	1592.5	4172.4			1768.15
	1600.2	4173.25			1774.2
	1604.65	4238.34			1774.69
	1615.55	4242.2			1775.7
	1631.25	4297.95			1801.85
	1639.6	4353.65			1804
	1664.1	4356.05			1809.3
	1671.2	4391.65			1812.95
	1678.3	4414.6			1818.95
	1680.45	4493.3			1820.8
	1682.3	4499.2			1826.8
	1684.41	4550.85			1826.8
	1687.15	4575.55			1828.8
	1690.15	4621.85			1838.9
	1690.7	4627.69			1856.45
	1708.4	4720.3			1869.95
	1716.1	4756			1873.2
	1717.4	4833.1			1879.35
	1720.9	4876.8			1887.1
	1726.1	4884.35			1887.8
	1729.35	4897.75			1897.15
	1735	4929.05			1909.2
	1735.1	4981.1			1913.5
	1736.2	5055.9			1919.4
	1748.3	5082.85			1922.06
	1766.4	5098.8			1935.65
	1770.8	5130.8			1943.6
	1774.65	5148.3			1953.55
	1774.7	5168.1			1963.6
	1780	5188.95			1964.8
	1790.5	5194.1			1965.1
	1796.06	5211.7			1973.25
	1803.95	5317.6			1982.2
	1805.5	5346.75			1983.55
	1806.2	5376.09			1999.9
	1823.7	5376.9			2000.15
	1832.69	5526.15			2027.35
	1837.3	5548.65			2040.1
	1838.75	5582.5			2046.95
	1847.2	5689.05			2047.2
	1857.6	5692.4			2058.95
	1861.05	5700.6			2062.4
	1864.55	5722.2			2068.85
	1870.1	5731.9			2071.2
	1889.81	5800.1			2080.5
	1898.06	5804.55			2091.05
	1906.65	5964.1			2091.85
	1914.19	6006.35			2092.55
	1916.05	6043.45			2097.55
	1932.45	6053.19			2107.6
	1937.6	6058.75			2130.1
	1940.65	6072.5			2131.5
	1947.75	6125.6			2137.8
	1953.15	6143.05			2152.45
	1964.05	6240.1			2153.45
	1969.15	6280.5			2159.85
	1980.3	6340.9			2162.2
	1997.4	6359.95			2181.95
	2021.25	6624.1			2183.5
	2033.25	6660.7			2189.9
	2044.3	6774.15			2191.55
	2044.4	6779.45			2206.75
	2050.55	6825.8			2237.15
	2059.3	6888.4			2237.35
	2067.5	6967.9			2253.8
	2076.3	6987.1			2305.85
	2076.8	6994.9			2306.2
	2105.85	7078.85			2323.55
	2107.5	7124.9			2327.6
	2114.15	7133.8			2328
	2118.55	7283			2337.55
	2123.6	7389.2			2350.2
	2125.6	7452.15			2357.85
	2130.25	7587.19			2375.65
	2133.55	7613.1			2384.7
	2145.09	7881.35			2385.55
	2166.35	8919.4			2405.85
	2176.4	8961.1			2408.15
	2189.9	9343.75			2409.85
	2196.2	9487.95			2412.85
	2200.1	9521.65			2414.95
	2208.05	9786.7			2424.05
	2223.1	9921.8			2449.3
	2223.5	10223.6			2452.65
	2230.5	10264.5			2468.95
	2237.95	11255.8			2471.35
	2238.85	11267.1			2482
	2260.05				2485.7
	2294.65				2494.4
	2303.1				2509.7
	2313.3				2514.25
	2315.5				2519.4
	2316.45				2519.45
	2331.3				2527.4
	2342.35				2533.05
	2354.5				2536.4
	2381.8				2538.8
	2416.8				2549.65
	2423				2553.2
	2424.65				2553.3
	2427.15				2565.8
	2444.85				2567.35
	2450.9				2572.25
	2493.05				2580.45
	2500.3				2581
	2508.3				2581.09
	2514.55				2604.85
	2534.95				2619.6
	2541.9				2622.65
	2571.5				2630.35
	2573.35				2645.95
	2585.45				2647.15
	2588.91				2651.9
	2610.9				2652.25
	2622.15				2654.05
	2644.95				2705.7
	2683.05				2712.15
	2693.5				2746.84
	2700.25				2753.15
	2702.1				2755
	2766.8				2761.8
	2802.05				2761.9
	2826.45				2770
	2836.5				2789.5
	2842				2796.59
	2854.8				2807.3
	2864.7				2807.7
	2865.45				2849.25
	2877.75				2851.7
	2881.4				2875.5
	2923.85				2885.75
	2967.75				2917.05
	3044.05				2930.45
	3068.6				2969.4
	3070.5				2974.25
	3079.8				2993.7
	3097.5				2994.25
	3231.66				3028.45
	3250.05				3030.75
	3311.5				3033.3
	3352.85				3048.3
	3388.65				3052.5
	3429.25				3066.4
	3443.75				3070.35
	3496.8				3075.6
	3565.5				3158.45
	3656.45				3189.65
	3667.75				3192.35
	3678.75				3239.05
	3680.55				3270.9
	3748.75				3311.15
	3787.5				3360.5
	3831.6				3380.75
	3889.2				3433.75
	3890.95				3497.1
	3930.65				3574.6
	3988.55				3580.35
	4007.4				3633.55
	4024.59				3636.7
	4030.6				3637.5
	4064.55				3647.05
	4067.35				3732.6
	4085.3				3748.95
	4107.55				3783.9
	4111.15				3792.7
	4153.5				3945.8
	4262.3				4071.4
	4327.75				4205.15
	4407.25				4217.3
	4419.19				4566.84
	4515				4658.75
	4548				4671
	4643.95				4712.05
	4867.94				4763.2
	4949.3				4786
	5258.9				4796.55
	5334.05				4816.45
	5410.05				4976.55
	5539.84				4993.09
	5817.1				5118.45
	5847.8				5187.6
	6701.25				5447.1
	6706.2				5452.05
	6744.4				5538.4
	6905.9				5687.5
	7056.34				5726.06
	7864.75				5769.65
	8510.3				5941.5
	8959.09				6189
	9251.25				6215.1
	9385.75				6800.5
	9625.1				7095
	12463.5				7436.45
	14638.8				7986.5
					8525.3
					9412.85
					10441.2
