# Supplementary material for: NPAS4 in the medial prefrontal cortex mediates chronic social defeat stress-induced anhedonia-like behavior and reductions in excitatory synapses
Source: eLife. 2023 Feb 13;12:e75631. doi: 10.7554/eLife.75631 (PMC9925055; doi:10.7554/eLife.75631)
Supplement: Figure 4—source data 4. — mEPSC amplitude (pA). [file elife-75631-fig4-data4.xlsx]

## Sheet: Sheet1
Source Data
Figure 4E
mAMPA amplitude (pA)
Experiment	Control			CSDS
Geno type	Mean	SD	N	Mean	SD	N
SC shRNA	7.655	3.77	1248	8.046	5.174	1150
Npas4 shRNA	9.723	4.554	654	9.216	7.04	1253
