# Supplementary material for: NPAS4 in the medial prefrontal cortex mediates chronic social defeat stress-induced anhedonia-like behavior and reductions in excitatory synapses
Source: eLife. 2023 Feb 13;12:e75631. doi: 10.7554/eLife.75631 (PMC9925055; doi:10.7554/eLife.75631)
Supplement: Figure 4—source data 5. — Cumulative probability of mEPSC amplitude (pA). [file elife-75631-fig4-data5.xlsx]

## Sheet: Sheet1
Source Data
Figure 4F
mAMPA amplitude (pA)
Geno type	SC shRNA			Npas4 shRNA
Experiment	Cont	CSDS		Cont	CSDS
Data	4	4		4.029	4.01
	4.01	4.01		4.05	4.021
	4.02	4.017		4.05	4.03
	4.02	4.017		4.07	4.03
	4.04	4.02		4.08	4.04
	4.04	4.03		4.09	4.04
	4.041	4.037		4.1	4.05
	4.05	4.04		4.1	4.051
	4.05	4.04		4.11	4.069
	4.05	4.04		4.15	4.08
	4.05	4.043		4.18	4.08
	4.052	4.05		4.2	4.08
	4.07	4.05		4.26	4.08
	4.07	4.053		4.26	4.081
	4.089	4.057		4.261	4.1
	4.09	4.06		4.29	4.12
	4.12	4.065		4.3	4.13
	4.125	4.07		4.33	4.13
	4.13	4.074		4.36	4.14
	4.13	4.088		4.361	4.14
	4.13	4.11		4.37	4.14
	4.145	4.11		4.37	4.14
	4.15	4.111		4.413	4.141
	4.15	4.111		4.44	4.151
	4.15	4.116		4.47	4.161
	4.15	4.116		4.48	4.165
	4.15	4.127		4.48	4.17
	4.18	4.13		4.5	4.17
	4.184	4.14		4.523	4.184
	4.19	4.14		4.54	4.184
	4.19	4.149		4.55	4.19
	4.19	4.15		4.55	4.19
	4.198	4.16		4.573	4.2
	4.21	4.16		4.58	4.2
	4.224	4.17		4.58	4.2
	4.25	4.17		4.58	4.203
	4.258	4.18		4.62	4.21
	4.26	4.184		4.62	4.21
	4.27	4.19		4.62	4.217
	4.27	4.19		4.624	4.22
	4.27	4.19		4.629	4.22
	4.271	4.19		4.69	4.22
	4.28	4.197		4.73	4.227
	4.28	4.2		4.73	4.23
	4.28	4.2		4.74	4.23
	4.29	4.2		4.75	4.233
	4.29	4.21		4.755	4.24
	4.29	4.22		4.77	4.24
	4.29	4.23		4.77	4.25
	4.29	4.25		4.78	4.251
	4.291	4.253		4.79	4.27
	4.3	4.256		4.8	4.27
	4.31	4.26		4.8	4.29
	4.31	4.27		4.83	4.29
	4.32	4.278		4.83	4.29
	4.32	4.28		4.83	4.297
	4.33	4.284		4.83	4.3
	4.33	4.289		4.86	4.306
	4.33	4.29		4.89	4.31
	4.336	4.295		4.94	4.31
	4.338	4.3		4.95	4.31
	4.35	4.3		4.95	4.324
	4.358	4.311		4.96	4.33
	4.36	4.328		4.96	4.33
	4.36	4.33		4.98	4.33
	4.36	4.34		4.99	4.33
	4.36	4.34		4.99	4.34
	4.37	4.34		5.01	4.34
	4.38	4.35		5.03	4.34
	4.4	4.353		5.04	4.342
	4.4	4.356		5.04	4.35
	4.4	4.36		5.09	4.36
	4.4	4.36		5.11	4.36
	4.41	4.369		5.12	4.36
	4.41	4.37		5.13	4.363
	4.42	4.376		5.14	4.363
	4.44	4.38		5.142	4.363
	4.44	4.38		5.15	4.37
	4.45	4.386		5.159	4.37
	4.45	4.39		5.16	4.37
	4.45	4.391		5.18	4.378
	4.46	4.393		5.18	4.38
	4.46	4.396		5.18	4.38
	4.47	4.4		5.19	4.39
	4.48	4.412		5.19	4.39
	4.48	4.424		5.21	4.392
	4.49	4.427		5.21	4.4
	4.5	4.429		5.218	4.406
	4.5	4.432		5.25	4.408
	4.5	4.436		5.27	4.42
	4.5	4.44		5.286	4.42
	4.5	4.44		5.33	4.43
	4.51	4.445		5.39	4.436
	4.51	4.446		5.39	4.442
	4.52	4.446		5.4	4.45
	4.52	4.45		5.4	4.46
	4.53	4.47		5.408	4.469
	4.53	4.47		5.41	4.47
	4.53	4.48		5.41	4.47
	4.53	4.481		5.41	4.475
	4.54	4.494		5.45	4.48
	4.54	4.502		5.47	4.48
	4.55	4.51		5.47	4.48
	4.55	4.516		5.53	4.487
	4.559	4.52		5.56	4.487
	4.56	4.52		5.6	4.488
	4.56	4.524		5.62	4.49
	4.57	4.53		5.63	4.49
	4.57	4.538		5.64	4.49
	4.584	4.541		5.64	4.49
	4.59	4.55		5.67	4.491
	4.59	4.552		5.7	4.5
	4.6	4.56		5.7	4.5
	4.62	4.561		5.71	4.506
	4.63	4.562		5.71	4.51
	4.63	4.57		5.72	4.52
	4.64	4.57		5.73	4.52
	4.65	4.572		5.74	4.53
	4.659	4.58		5.75	4.53
	4.67	4.58		5.76	4.53
	4.68	4.581		5.77	4.531
	4.69	4.581		5.78	4.543
	4.7	4.586		5.78	4.548
	4.713	4.59		5.79	4.55
	4.72	4.591		5.79	4.55
	4.72	4.592		5.79	4.55
	4.72	4.592		5.79	4.55
	4.74	4.594		5.8	4.56
	4.74	4.597		5.81	4.56
	4.74	4.6		5.82	4.56
	4.74	4.602		5.86	4.57
	4.75	4.61		5.87	4.57
	4.75	4.614		5.87	4.57
	4.75	4.624		5.88	4.575
	4.76	4.624		5.88	4.58
	4.76	4.629		5.88	4.58
	4.76	4.64		5.89	4.583
	4.77	4.64		5.89	4.59
	4.77	4.64		5.89	4.59
	4.77	4.64		5.89	4.59
	4.77	4.64		5.9	4.59
	4.78	4.64		5.9	4.596
	4.78	4.648		5.9	4.597
	4.78	4.65		5.905	4.6
	4.78	4.65		5.91	4.6
	4.784	4.65		5.92	4.61
	4.787	4.65		5.94	4.61
	4.79	4.66		5.95	4.61
	4.79	4.665		5.95	4.627
	4.79	4.665		5.96	4.63
	4.797	4.67		5.98	4.63
	4.8	4.672		5.998	4.634
	4.8	4.672		6	4.639
	4.8	4.674		6.005	4.64
	4.804	4.676		6.007	4.64
	4.81	4.683		6.03	4.641
	4.81	4.7		6.04	4.642
	4.81	4.704		6.04	4.65
	4.815	4.71		6.05	4.656
	4.82	4.71		6.06	4.66
	4.823	4.71		6.08	4.663
	4.826	4.71		6.08	4.678
	4.837	4.712		6.12	4.678
	4.84	4.712		6.13	4.678
	4.84	4.72		6.13	4.68
	4.84	4.72		6.13	4.68
	4.843	4.72		6.14	4.68
	4.849	4.72		6.19	4.69
	4.85	4.72		6.19	4.693
	4.85	4.739		6.21	4.7
	4.86	4.74		6.22	4.7
	4.88	4.743		6.236	4.7
	4.887	4.749		6.24	4.707
	4.903	4.75		6.27	4.717
	4.903	4.75		6.3	4.72
	4.904	4.75		6.32	4.72
	4.904	4.75		6.33	4.722
	4.91	4.754		6.33	4.727
	4.917	4.757		6.36	4.729
	4.92	4.76		6.36	4.74
	4.92	4.76		6.38	4.74
	4.92	4.76		6.38	4.742
	4.93	4.765		6.38	4.748
	4.93	4.77		6.39	4.75
	4.93	4.77		6.45	4.758
	4.94	4.77		6.45	4.76
	4.943	4.771		6.46	4.766
	4.943	4.771		6.48	4.769
	4.95	4.774		6.482	4.77
	4.96	4.776		6.51	4.77
	4.961	4.776		6.533	4.78
	4.963	4.78		6.56	4.78
	4.97	4.788		6.56	4.78
	4.97	4.79		6.57	4.78
	4.98	4.799		6.6	4.788
	4.98	4.8		6.609	4.79
	4.98	4.8		6.61	4.79
	4.98	4.804		6.64	4.8
	4.98	4.804		6.64	4.8
	4.98	4.804		6.64	4.81
	4.987	4.804		6.66	4.82
	4.99	4.81		6.67	4.824
	5	4.81		6.68	4.826
	5	4.81		6.71	4.83
	5.01	4.82		6.73	4.83
	5.01	4.82		6.73	4.83
	5.02	4.82		6.73	4.83
	5.027	4.821		6.74	4.833
	5.03	4.821		6.754	4.839
	5.03	4.827		6.81	4.84
	5.038	4.83		6.82	4.844
	5.04	4.83		6.82	4.851
	5.04	4.832		6.84	4.851
	5.04	4.832		6.85	4.86
	5.04	4.837		6.9	4.86
	5.05	4.84		6.9	4.86
	5.05	4.84		6.9	4.87
	5.051	4.84		6.93	4.87
	5.056	4.85		6.932	4.875
	5.06	4.851		6.95	4.88
	5.06	4.855		6.97	4.88
	5.07	4.86		7.02	4.883
	5.07	4.863		7.03	4.887
	5.08	4.87		7.04	4.889
	5.08	4.87		7.06	4.89
	5.08	4.874		7.07	4.89
	5.08	4.877		7.09	4.89
	5.09	4.877		7.1	4.89
	5.1	4.88		7.1	4.9
	5.1	4.888		7.16	4.9
	5.1	4.89		7.161	4.91
	5.1	4.894		7.18	4.92
	5.1	4.9		7.18	4.92
	5.1	4.903		7.2	4.922
	5.11	4.904		7.246	4.923
	5.11	4.905		7.26	4.93
	5.11	4.92		7.27	4.93
	5.11	4.92		7.29	4.93
	5.12	4.92		7.3	4.94
	5.12	4.92		7.331	4.94
	5.12	4.92		7.35	4.95
	5.12	4.922		7.35	4.953
	5.13	4.93		7.36	4.967
	5.13	4.938		7.43	4.97
	5.13	4.939		7.43	4.98
	5.14	4.94		7.44	4.98
	5.149	4.94		7.45	4.98
	5.15	4.944		7.51	4.985
	5.16	4.95		7.54	4.99
	5.16	4.953		7.55	4.996
	5.16	4.96		7.551	5
	5.16	4.96		7.57	5
	5.167	4.96		7.58	5
	5.17	4.97		7.59	5.005
	5.17	4.97		7.6	5.01
	5.17	4.976		7.61	5.01
	5.17	4.98		7.62	5.014
	5.17	4.98		7.63	5.02
	5.17	4.98		7.64	5.02
	5.172	4.98		7.65	5.022
	5.18	4.98		7.68	5.03
	5.18	4.981		7.7	5.04
	5.18	4.984		7.71	5.04
	5.19	4.985		7.712	5.05
	5.21	4.99		7.72	5.078
	5.21	4.995		7.73	5.08
	5.21	5		7.75	5.085
	5.21	5		7.772	5.087
	5.22	5.001		7.79	5.09
	5.22	5.003		7.8	5.095
	5.24	5.01		7.81	5.096
	5.24	5.017		7.81	5.11
	5.24	5.019		7.81	5.117
	5.26	5.02		7.81	5.117
	5.269	5.02		7.814	5.12
	5.27	5.03		7.82	5.133
	5.27	5.038		7.83	5.14
	5.27	5.05		7.84	5.146
	5.27	5.051		7.86	5.15
	5.273	5.053		7.88	5.15
	5.28	5.059		7.89	5.15
	5.289	5.06		7.95	5.158
	5.29	5.06		7.98	5.16
	5.3	5.06		7.99	5.17
	5.3	5.065		7.992	5.17
	5.3	5.067		8.01	5.19
	5.302	5.067		8.01	5.19
	5.31	5.07		8.05	5.19
	5.317	5.08		8.069	5.196
	5.32	5.085		8.09	5.2
	5.32	5.093		8.1	5.201
	5.33	5.101		8.111	5.202
	5.33	5.106		8.12	5.205
	5.33	5.106		8.13	5.208
	5.33	5.107		8.13	5.22
	5.35	5.112		8.13	5.226
	5.357	5.115		8.13	5.23
	5.36	5.12		8.15	5.239
	5.36	5.12		8.16	5.24
	5.361	5.13		8.16	5.24
	5.375	5.13		8.18	5.25
	5.38	5.133		8.19	5.256
	5.38	5.135		8.2	5.264
	5.38	5.15		8.2	5.27
	5.38	5.15		8.21	5.27
	5.39	5.157		8.21	5.27
	5.39	5.158		8.24	5.27
	5.4	5.16		8.25	5.271
	5.4	5.167		8.29	5.271
	5.4	5.168		8.31	5.28
	5.402	5.17		8.31	5.29
	5.41	5.18		8.32	5.29
	5.417	5.18		8.35	5.29
	5.417	5.188		8.39	5.296
	5.42	5.199		8.46	5.3
	5.42	5.2		8.46	5.3
	5.422	5.202		8.51	5.3
	5.43	5.207		8.53	5.3
	5.43	5.207		8.53	5.3
	5.44	5.21		8.53	5.305
	5.44	5.21		8.56	5.31
	5.44	5.214		8.56	5.31
	5.44	5.215		8.58	5.31
	5.442	5.22		8.59	5.31
	5.45	5.22		8.595	5.314
	5.45	5.22		8.64	5.32
	5.45	5.224		8.66	5.32
	5.46	5.238		8.67	5.32
	5.46	5.24		8.68	5.32
	5.46	5.245		8.69	5.33
	5.47	5.247		8.69	5.33
	5.473	5.247		8.74	5.335
	5.473	5.252		8.83	5.341
	5.48	5.258		8.88	5.347
	5.48	5.27		8.91	5.35
	5.49	5.274		8.94	5.35
	5.49	5.279		8.94	5.351
	5.5	5.28		8.99	5.36
	5.5	5.28		8.99	5.36
	5.52	5.28		9	5.36
	5.52	5.28		9.03	5.37
	5.53	5.286		9.05	5.37
	5.53	5.29		9.05	5.373
	5.531	5.29		9.06	5.38
	5.535	5.293		9.07	5.383
	5.54	5.295		9.08	5.39
	5.54	5.297		9.09	5.39
	5.542	5.3		9.11	5.394
	5.551	5.3		9.13	5.4
	5.56	5.3		9.13	5.4
	5.56	5.3		9.13	5.402
	5.56	5.303		9.14	5.403
	5.563	5.309		9.19	5.41
	5.58	5.31		9.23	5.414
	5.582	5.31		9.28	5.423
	5.59	5.313		9.3	5.43
	5.59	5.314		9.32	5.432
	5.59	5.314		9.39	5.432
	5.595	5.316		9.39	5.44
	5.6	5.32		9.4	5.44
	5.6	5.32		9.42	5.45
	5.611	5.32		9.43	5.45
	5.618	5.322		9.43	5.45
	5.618	5.325		9.44	5.456
	5.62	5.33		9.47	5.46
	5.63	5.33		9.52	5.46
	5.64	5.332		9.53	5.46
	5.65	5.335		9.53	5.462
	5.65	5.339		9.54	5.462
	5.65	5.34		9.587	5.48
	5.66	5.34		9.59	5.49
	5.66	5.34		9.6	5.49
	5.66	5.348		9.61	5.5
	5.662	5.35		9.63	5.5
	5.662	5.353		9.69	5.505
	5.67	5.36		9.77	5.51
	5.673	5.364		9.79	5.52
	5.673	5.366		9.81	5.52
	5.675	5.375		9.81	5.52
	5.68	5.38		9.82	5.523
	5.68	5.38		9.83	5.53
	5.682	5.391		9.85	5.53
	5.69	5.395		9.85	5.54
	5.696	5.409		9.88	5.55
	5.7	5.41		9.92	5.55
	5.706	5.419		9.93	5.55
	5.707	5.42		9.99	5.556
	5.707	5.42		10	5.559
	5.72	5.43		10.01	5.56
	5.72	5.43		10.02	5.56
	5.73	5.434		10.02	5.564
	5.74	5.44		10.11	5.569
	5.748	5.45		10.11	5.57
	5.75	5.46		10.11	5.571
	5.75	5.466		10.12	5.575
	5.751	5.48		10.12	5.578
	5.751	5.481		10.14	5.589
	5.756	5.482		10.16	5.59
	5.77	5.487		10.17	5.6
	5.77	5.49		10.17	5.608
	5.77	5.49		10.24	5.61
	5.77	5.5		10.24	5.61
	5.774	5.504		10.25	5.62
	5.78	5.509		10.26	5.62
	5.79	5.51		10.26	5.626
	5.8	5.512		10.26	5.63
	5.81	5.515		10.28	5.632
	5.81	5.515		10.28	5.632
	5.822	5.516		10.28	5.64
	5.83	5.52		10.292	5.64
	5.83	5.52		10.3	5.641
	5.83	5.53		10.33	5.65
	5.84	5.534		10.36	5.66
	5.84	5.534		10.41	5.66
	5.84	5.54		10.43	5.67
	5.841	5.55		10.46	5.68
	5.85	5.55		10.46	5.687
	5.852	5.551		10.47	5.7
	5.855	5.551		10.48	5.7
	5.87	5.56		10.49	5.702
	5.88	5.56		10.56	5.703
	5.88	5.564		10.58	5.709
	5.88	5.567		10.59	5.714
	5.885	5.577		10.6	5.723
	5.888	5.58		10.62	5.723
	5.891	5.59		10.63	5.732
	5.9	5.593		10.68	5.738
	5.91	5.595		10.72	5.74
	5.91	5.6		10.74	5.74
	5.917	5.602		10.74	5.744
	5.93	5.602		10.76	5.752
	5.93	5.605		10.76	5.76
	5.93	5.606		10.77	5.76
	5.941	5.61		10.8	5.761
	5.95	5.63		10.81	5.77
	5.95	5.633		10.84	5.77
	5.959	5.634		10.89	5.78
	5.96	5.64		10.89	5.79
	5.96	5.66		10.89	5.792
	5.96	5.666		10.97	5.8
	5.96	5.67		10.99	5.805
	5.961	5.681		11.018	5.81
	5.974	5.689		11.06	5.81
	5.974	5.702		11.08	5.813
	5.974	5.717		11.08	5.82
	5.974	5.735		11.1	5.823
	5.98	5.74		11.1	5.83
	5.98	5.75		11.11	5.83
	5.982	5.75		11.12	5.83
	5.99	5.752		11.16	5.836
	5.99	5.752		11.18	5.84
	5.99	5.756		11.19	5.85
	5.99	5.759		11.2	5.856
	5.99	5.766		11.22	5.859
	6	5.769		11.22	5.86
	6.008	5.772		11.26	5.86
	6.008	5.773		11.26	5.864
	6.008	5.777		11.27	5.87
	6.01	5.777		11.27	5.878
	6.01	5.78		11.3	5.88
	6.01	5.78		11.33	5.89
	6.019	5.788		11.38	5.91
	6.02	5.79		11.4	5.91
	6.03	5.79		11.42	5.91
	6.03	5.794		11.47	5.915
	6.031	5.795		11.51	5.916
	6.034	5.802		11.51	5.94
	6.037	5.807		11.54	5.94
	6.04	5.81		11.55	5.96
	6.041	5.81		11.56	5.97
	6.043	5.816		11.57	5.97
	6.049	5.818		11.63	5.97
	6.05	5.819		11.64	5.97
	6.05	5.82		11.64	5.977
	6.05	5.82		11.67	5.98
	6.05	5.82		11.74	5.983
	6.05	5.823		11.75	5.99
	6.05	5.83		11.75	6
	6.06	5.83		11.78	6
	6.075	5.838		11.81	6.003
	6.08	5.84		11.83	6.02
	6.086	5.847		11.853	6.04
	6.086	5.85		11.86	6.04
	6.09	5.852		11.86	6.05
	6.09	5.859		11.86	6.05
	6.09	5.86		11.87	6.069
	6.1	5.876		11.88	6.07
	6.1	5.878		11.94	6.074
	6.11	5.88		11.96	6.08
	6.123	5.88		11.97	6.09
	6.13	5.884		11.97	6.09
	6.13	5.894		11.99	6.1
	6.13	5.9		12.01	6.105
	6.14	5.902		12.01	6.11
	6.14	5.907		12.02	6.11
	6.141	5.909		12.044	6.11
	6.141	5.92		12.13	6.11
	6.141	5.935		12.16	6.11
	6.15	5.937		12.17	6.119
	6.16	5.94		12.18	6.126
	6.16	5.945		12.19	6.132
	6.17	5.953		12.22	6.15
	6.175	5.962		12.25	6.15
	6.176	5.963		12.26	6.152
	6.18	5.969		12.29	6.16
	6.18	5.97		12.3	6.16
	6.19	5.98		12.362	6.16
	6.192	5.986		12.38	6.161
	6.197	5.987		12.41	6.169
	6.2	6.019		12.42	6.171
	6.2	6.02		12.43	6.183
	6.21	6.025		12.44	6.186
	6.21	6.03		12.44	6.186
	6.21	6.03		12.64	6.19
	6.21	6.039		12.71	6.19
	6.22	6.039		12.72	6.21
	6.22	6.04		12.744	6.213
	6.23	6.047		12.75	6.22
	6.23	6.05		12.79	6.24
	6.234	6.06		12.79	6.248
	6.234	6.062		12.82	6.26
	6.239	6.064		12.88	6.267
	6.24	6.07		12.93	6.27
	6.24	6.073		12.981	6.28
	6.247	6.088		13.05	6.286
	6.25	6.106		13.06	6.29
	6.26	6.108		13.139	6.296
	6.26	6.12		13.14	6.3
	6.266	6.123		13.17	6.3
	6.28	6.126		13.18	6.303
	6.28	6.128		13.25	6.303
	6.29	6.13		13.33	6.31
	6.29	6.13		13.36	6.325
	6.3	6.13		13.37	6.33
	6.31	6.13		13.37	6.331
	6.31	6.13		13.42	6.338
	6.313	6.132		13.43	6.34
	6.33	6.144		13.46	6.34
	6.33	6.15		13.64	6.341
	6.33	6.152		13.67	6.346
	6.331	6.155		13.74	6.35
	6.34	6.155		13.77	6.35
	6.35	6.176		13.84	6.35
	6.35	6.178		13.91	6.359
	6.353	6.18		13.93	6.368
	6.353	6.182		13.95	6.37
	6.354	6.187		13.99	6.38
	6.354	6.19		13.99	6.384
	6.36	6.191		14.03	6.39
	6.36	6.201		14.03	6.39
	6.367	6.204		14.04	6.395
	6.37	6.21		14.09	6.398
	6.37	6.213		14.1	6.402
	6.376	6.22		14.11	6.41
	6.387	6.22		14.11	6.41
	6.387	6.229		14.13	6.42
	6.4	6.23		14.13	6.43
	6.4	6.23		14.16	6.43
	6.408	6.23		14.19	6.432
	6.41	6.244		14.23	6.437
	6.41	6.25		14.24	6.44
	6.41	6.258		14.28	6.44
	6.41	6.26		14.29	6.44
	6.42	6.26		14.29	6.441
	6.42	6.267		14.393	6.45
	6.42	6.272		14.474	6.45
	6.42	6.275		14.5	6.459
	6.42	6.28		14.64	6.465
	6.431	6.28		14.65	6.468
	6.431	6.283		14.66	6.47
	6.435	6.289		14.71	6.48
	6.437	6.29		14.87	6.49
	6.44	6.294		15.06	6.49
	6.44	6.294		15.145	6.495
	6.442	6.301		15.162	6.529
	6.445	6.31		15.19	6.54
	6.45	6.31		15.21	6.55
	6.45	6.33		15.22	6.559
	6.45	6.339		15.26	6.56
	6.45	6.36		15.26	6.57
	6.459	6.361		15.26	6.58
	6.46	6.369		15.28	6.58
	6.47	6.37		15.34	6.593
	6.47	6.376		15.67	6.6
	6.472	6.4		15.68	6.603
	6.473	6.4		15.77	6.61
	6.476	6.411		15.78	6.611
	6.476	6.411		15.82	6.614
	6.482	6.42		15.85	6.618
	6.49	6.423		15.85	6.63
	6.49	6.427		15.86	6.64
	6.496	6.43		16.03	6.66
	6.498	6.44		16.07	6.662
	6.498	6.444		16.15	6.67
	6.51	6.458		16.18	6.673
	6.514	6.46		16.21	6.68
	6.52	6.46		16.24	6.686
	6.53	6.467		16.26	6.69
	6.55	6.47		16.27	6.69
	6.554	6.48		16.4	6.691
	6.565	6.49		16.415	6.71
	6.57	6.494		16.46	6.72
	6.573	6.494		16.5	6.72
	6.58	6.501		16.54	6.731
	6.58	6.51		16.63	6.74
	6.598	6.515		16.63	6.74
	6.6	6.54		16.82	6.74
	6.6	6.546		16.82	6.75
	6.606	6.559		16.95	6.75
	6.61	6.56		17.03	6.768
	6.61	6.563		17.11	6.777
	6.62	6.563		17.12	6.777
	6.625	6.57		17.18	6.79
	6.632	6.587		17.19	6.8
	6.632	6.587		17.2	6.837
	6.64	6.59		17.21	6.85
	6.64	6.594		17.63	6.855
	6.643	6.6		17.81	6.877
	6.643	6.602		17.85	6.886
	6.643	6.61		18.24	6.91
	6.65	6.613		18.31	6.91
	6.65	6.62		18.62	6.91
	6.65	6.647		18.88	6.915
	6.665	6.658		18.89	6.92
	6.67	6.658		18.92	6.93
	6.673	6.67		18.97	6.94
	6.676	6.672		19.01	6.94
	6.68	6.68		19.06	6.94
	6.69	6.685		19.22	6.947
	6.69	6.69		19.77	6.952
	6.69	6.697		19.78	6.96
	6.699	6.697		19.79	6.969
	6.699	6.701		19.972	6.969
	6.7	6.715		20.13	6.97
	6.7	6.72		20.46	6.97
	6.7	6.722		20.69	6.977
	6.7	6.725		20.691	6.988
	6.7	6.732		20.95	7
	6.72	6.75		21.09	7.004
	6.72	6.766		21.2	7.004
	6.721	6.78		21.21	7.01
	6.73	6.781		21.42	7.01
	6.73	6.787		21.78	7.02
	6.734	6.79		21.89	7.029
	6.734	6.792		21.97	7.03
	6.736	6.792		22.27	7.049
	6.76	6.797		22.41	7.055
	6.77	6.8		23.833	7.058
	6.777	6.801		23.91	7.07
	6.78	6.81		26.02	7.07
	6.78	6.834		26.41	7.07
	6.79	6.84		30.08	7.077
	6.799	6.848		35.47	7.08
	6.8	6.85		35.53	7.086
	6.801	6.859			7.09
	6.81	6.86			7.091
	6.81	6.87			7.101
	6.82	6.879			7.101
	6.826	6.887			7.11
	6.83	6.9			7.115
	6.833	6.9			7.122
	6.844	6.918			7.122
	6.851	6.92			7.13
	6.855	6.93			7.13
	6.857	6.944			7.14
	6.86	6.95			7.145
	6.863	6.95			7.152
	6.866	6.96			7.16
	6.866	6.98			7.16
	6.87	7			7.167
	6.87	7			7.17
	6.879	7.017			7.17
	6.88	7.02			7.18
	6.88	7.022			7.18
	6.884	7.034			7.193
	6.888	7.04			7.2
	6.89	7.05			7.2
	6.89	7.052			7.22
	6.893	7.06			7.225
	6.9	7.076			7.23
	6.911	7.077			7.24
	6.92	7.108			7.26
	6.92	7.114			7.27
	6.92	7.115			7.27
	6.947	7.12			7.27
	6.97	7.127			7.27
	6.973	7.139			7.277
	6.98	7.151			7.28
	6.99	7.165			7.285
	6.99	7.169			7.29
	6.99	7.169			7.299
	7.01	7.179			7.303
	7.01	7.179			7.33
	7.016	7.18			7.34
	7.016	7.18			7.349
	7.019	7.19			7.358
	7.022	7.195			7.376
	7.03	7.21			7.376
	7.03	7.212			7.379
	7.033	7.216			7.38
	7.033	7.222			7.4
	7.033	7.222			7.4
	7.044	7.25			7.4
	7.048	7.251			7.41
	7.05	7.26			7.422
	7.05	7.272			7.426
	7.06	7.308			7.43
	7.072	7.329			7.44
	7.079	7.337			7.45
	7.09	7.343			7.45
	7.1	7.346			7.452
	7.1	7.363			7.46
	7.1	7.37			7.49
	7.1	7.371			7.5
	7.122	7.39			7.51
	7.13	7.393			7.517
	7.14	7.4			7.52
	7.14	7.41			7.52
	7.148	7.412			7.549
	7.15	7.415			7.55
	7.163	7.42			7.558
	7.169	7.429			7.57
	7.169	7.438			7.58
	7.178	7.45			7.59
	7.18	7.453			7.594
	7.18	7.454			7.6
	7.185	7.464			7.61
	7.189	7.47			7.61
	7.195	7.47			7.61
	7.199	7.474			7.62
	7.2	7.479			7.63
	7.2	7.479			7.63
	7.2	7.486			7.643
	7.2	7.51			7.643
	7.206	7.515			7.649
	7.21	7.538			7.67
	7.212	7.55			7.703
	7.22	7.565			7.73
	7.22	7.57			7.73
	7.227	7.599			7.76
	7.227	7.635			7.77
	7.234	7.64			7.77
	7.24	7.647			7.775
	7.245	7.65			7.777
	7.25	7.66			7.79
	7.25	7.664			7.79
	7.252	7.69			7.794
	7.27	7.7			7.812
	7.272	7.722			7.85
	7.278	7.726			7.88
	7.28	7.76			7.88
	7.29	7.768			7.883
	7.29	7.77			7.91
	7.3	7.806			7.914
	7.301	7.814			7.916
	7.31	7.818			7.928
	7.31	7.821			7.936
	7.32	7.83			7.94
	7.325	7.84			7.95
	7.329	7.844			7.999
	7.33	7.852			8
	7.334	7.87			8.001
	7.34	7.882			8.001
	7.35	7.89			8.01
	7.36	7.89			8.013
	7.368	7.9			8.016
	7.368	7.921			8.049
	7.37	7.936			8.05
	7.37	7.94			8.06
	7.386	7.949			8.067
	7.39	7.951			8.078
	7.39	7.964			8.1
	7.41	7.99			8.1
	7.41	7.99			8.1
	7.41	8.012			8.104
	7.412	8.014			8.12
	7.415	8.026			8.12
	7.42	8.028			8.121
	7.42	8.029			8.133
	7.43	8.033			8.19
	7.433	8.035			8.192
	7.434	8.05			8.193
	7.44	8.052			8.203
	7.446	8.054			8.206
	7.446	8.073			8.21
	7.451	8.082			8.217
	7.457	8.11			8.23
	7.458	8.11			8.239
	7.465	8.13			8.248
	7.476	8.136			8.248
	7.48	8.139			8.25
	7.5	8.154			8.274
	7.54	8.164			8.28
	7.54	8.175			8.33
	7.54	8.18			8.34
	7.55	8.201			8.36
	7.559	8.209			8.371
	7.578	8.21			8.38
	7.579	8.214			8.39
	7.584	8.24			8.412
	7.588	8.25			8.43
	7.59	8.257			8.43
	7.59	8.257			8.43
	7.59	8.291			8.44
	7.59	8.31			8.448
	7.59	8.31			8.52
	7.597	8.316			8.543
	7.598	8.335			8.55
	7.6	8.36			8.57
	7.61	8.375			8.575
	7.61	8.393			8.6
	7.611	8.41			8.6
	7.613	8.428			8.616
	7.617	8.43			8.62
	7.62	8.435			8.64
	7.62	8.442			8.648
	7.624	8.452			8.648
	7.65	8.454			8.65
	7.67	8.485			8.659
	7.671	8.5			8.67
	7.68	8.51			8.691
	7.68	8.53			8.697
	7.687	8.539			8.7
	7.69	8.549			8.726
	7.692	8.56			8.73
	7.694	8.564			8.732
	7.708	8.578			8.738
	7.71	8.61			8.74
	7.72	8.628			8.741
	7.72	8.63			8.762
	7.73	8.631			8.803
	7.73	8.649			8.807
	7.744	8.67			8.81
	7.747	8.67			8.81
	7.75	8.68			8.812
	7.751	8.69			8.83
	7.76	8.69			8.836
	7.76	8.706			8.847
	7.76	8.712			8.86
	7.763	8.713			8.89
	7.77	8.72			8.896
	7.77	8.742			8.909
	7.793	8.763			8.93
	7.8	8.77			8.94
	7.803	8.78			8.96
	7.813	8.785			8.96
	7.819	8.794			9.002
	7.82	8.797			9.05
	7.831	8.82			9.08
	7.84	8.82			9.084
	7.843	8.838			9.09
	7.847	8.85			9.09
	7.85	8.86			9.09
	7.858	8.88			9.092
	7.869	8.885			9.111
	7.87	8.91			9.114
	7.87	8.94			9.13
	7.87	8.942			9.13
	7.893	8.97			9.15
	7.91	8.971			9.158
	7.92	8.972			9.16
	7.925	8.99			9.165
	7.93	8.991			9.166
	7.93	8.992			9.18
	7.93	9.01			9.2
	7.941	9.02			9.21
	7.941	9.022			9.26
	7.951	9.035			9.27
	7.953	9.038			9.275
	7.96	9.049			9.292
	7.96	9.066			9.31
	7.962	9.113			9.32
	7.964	9.12			9.33
	7.981	9.15			9.363
	7.99	9.15			9.366
	8	9.199			9.37
	8.014	9.2			9.372
	8.025	9.2			9.384
	8.04	9.21			9.385
	8.068	9.23			9.4
	8.068	9.249			9.419
	8.078	9.25			9.42
	8.08	9.26			9.46
	8.081	9.26			9.46
	8.082	9.316			9.46
	8.1	9.367			9.471
	8.103	9.387			9.488
	8.11	9.42			9.49
	8.12	9.42			9.51
	8.125	9.44			9.524
	8.125	9.441			9.53
	8.14	9.441			9.568
	8.15	9.467			9.596
	8.159	9.471			9.597
	8.161	9.477			9.602
	8.173	9.5			9.612
	8.18	9.525			9.62
	8.181	9.527			9.64
	8.19	9.548			9.647
	8.19	9.576			9.656
	8.192	9.59			9.675
	8.2	9.6			9.677
	8.226	9.6			9.68
	8.226	9.607			9.69
	8.228	9.63			9.707
	8.23	9.641			9.71
	8.23	9.646			9.74
	8.248	9.676			9.79
	8.259	9.687			9.795
	8.268	9.69			9.81
	8.3	9.711			9.83
	8.31	9.755			9.83
	8.33	9.758			9.83
	8.337	9.784			9.865
	8.337	9.8			9.868
	8.351	9.82			9.88
	8.363	9.852			9.89
	8.393	9.862			9.913
	8.4	9.87			9.93
	8.4	9.88			9.956
	8.406	9.889			9.965
	8.421	9.91			9.97
	8.43	9.92			9.974
	8.43	9.937			9.992
	8.449	9.944			10.015
	8.449	9.956			10.027
	8.45	9.99			10.048
	8.469	10.012			10.065
	8.49	10.03			10.07
	8.496	10.034			10.072
	8.501	10.11			10.088
	8.52	10.286			10.09
	8.52	10.31			10.111
	8.52	10.314			10.132
	8.527	10.322			10.133
	8.528	10.323			10.147
	8.53	10.39			10.149
	8.53	10.398			10.18
	8.535	10.419			10.183
	8.547	10.44			10.19
	8.57	10.456			10.22
	8.57	10.465			10.23
	8.57	10.515			10.256
	8.575	10.527			10.26
	8.575	10.531			10.3
	8.59	10.59			10.309
	8.627	10.593			10.31
	8.63	10.64			10.31
	8.64	10.68			10.319
	8.649	10.7			10.32
	8.65	10.703			10.33
	8.65	10.787			10.356
	8.672	10.79			10.38
	8.672	10.826			10.39
	8.675	10.829			10.4
	8.675	10.87			10.42
	8.683	10.9			10.43
	8.688	10.904			10.447
	8.69	10.96			10.46
	8.69	10.96			10.46
	8.694	10.973			10.46
	8.7	10.99			10.483
	8.702	10.998			10.507
	8.749	11.011			10.52
	8.749	11.04			10.53
	8.77	11.05			10.55
	8.775	11.116			10.58
	8.791	11.12			10.61
	8.8	11.125			10.662
	8.812	11.146			10.67
	8.823	11.158			10.71
	8.83	11.161			10.755
	8.83	11.17			10.765
	8.839	11.177			10.776
	8.85	11.24			10.8
	8.85	11.304			10.801
	8.87	11.31			10.82
	8.883	11.369			10.85
	8.886	11.382			10.87
	8.907	11.4			10.877
	8.921	11.41			10.88
	8.923	11.429			10.89
	8.928	11.454			10.892
	8.928	11.462			10.92
	8.93	11.48			10.93
	8.939	11.588			10.93
	8.941	11.604			10.946
	8.95	11.611			10.95
	8.955	11.611			10.95
	8.98	11.63			11
	8.98	11.632			11.01
	8.987	11.656			11.04
	9.008	11.67			11.06
	9.02	11.71			11.07
	9.03	11.73			11.082
	9.04	11.731			11.094
	9.045	11.77			11.136
	9.07	11.797			11.15
	9.09	11.83			11.215
	9.09	11.882			11.31
	9.14	11.915			11.34
	9.142	11.955			11.34
	9.171	11.976			11.35
	9.18	12.001			11.409
	9.18	12.002			11.419
	9.19	12.01			11.43
	9.207	12.018			11.44
	9.21	12.032			11.47
	9.24	12.145			11.493
	9.241	12.175			11.546
	9.254	12.2			11.57
	9.325	12.31			11.6
	9.367	12.34			11.602
	9.388	12.35			11.623
	9.39	12.38			11.64
	9.404	12.396			11.666
	9.41	12.469			11.682
	9.43	12.505			11.687
	9.436	12.51			11.691
	9.47	12.51			11.73
	9.474	12.558			11.736
	9.52	12.561			11.75
	9.53	12.59			11.8
	9.54	12.61			11.863
	9.568	12.617			11.864
	9.574	12.654			11.91
	9.58	12.66			11.937
	9.582	12.661			11.941
	9.589	12.676			11.946
	9.594	12.68			11.955
	9.62	12.737			11.96
	9.636	12.754			11.98
	9.64	12.787			11.99
	9.663	12.933			11.991
	9.67	12.938			12.01
	9.673	12.98			12.01
	9.69	12.98			12.046
	9.7	13.045			12.05
	9.7	13.07			12.082
	9.742	13.08			12.34
	9.747	13.131			12.38
	9.753	13.224			12.39
	9.756	13.28			12.391
	9.81	13.31			12.455
	9.84	13.34			12.457
	9.87	13.368			12.493
	9.885	13.495			12.51
	9.909	13.559			12.51
	9.911	13.579			12.52
	9.94	13.603			12.562
	9.948	13.722			12.62
	9.953	13.757			12.634
	9.957	13.763			12.645
	9.96	13.892			12.7
	9.964	13.933			12.7
	9.992	14.09			12.71
	10.001	14.125			12.73
	10.02	14.187			12.789
	10.025	14.203			12.83
	10.054	14.304			12.856
	10.059	14.448			12.87
	10.076	14.59			12.959
	10.11	14.679			13.062
	10.11	14.77			13.3
	10.126	14.8			13.31
	10.16	14.85			13.31
	10.23	15.047			13.345
	10.25	15.07			13.4
	10.265	15.076			13.408
	10.33	15.21			13.413
	10.351	15.232			13.43
	10.355	15.391			13.613
	10.377	15.42			13.65
	10.41	15.54			13.69
	10.412	15.56			13.71
	10.456	15.59			13.89
	10.495	15.749			13.899
	10.55	15.81			13.94
	10.566	15.848			13.96
	10.577	15.85			14.04
	10.598	15.86			14.08
	10.611	15.919			14.09
	10.696	16.025			14.13
	10.71	16.116			14.132
	10.745	16.32			14.15
	10.745	16.39			14.229
	10.75	16.41			14.24
	10.751	16.52			14.25
	10.792	16.657			14.28
	10.8	16.767			14.3
	10.801	16.935			14.358
	10.82	16.971			14.375
	10.83	17.013			14.42
	10.856	17.16			14.422
	10.86	17.383			14.471
	10.88	17.76			14.473
	10.92	18.082			14.48
	10.93	18.233			14.52
	10.934	18.383			14.53
	11.023	18.715			14.58
	11.033	18.908			14.806
	11.051	18.926			14.82
	11.09	19.069			14.853
	11.112	19.19			14.853
	11.12	19.63			15.029
	11.128	19.996			15.043
	11.151	20.103			15.083
	11.157	20.124			15.24
	11.17	20.149			15.35
	11.18	20.233			15.449
	11.21	20.34			15.56
	11.269	20.345			15.63
	11.269	20.37			15.652
	11.28	20.518			15.652
	11.313	20.959			15.661
	11.32	21.117			15.688
	11.358	21.33			15.766
	11.39	21.47			15.77
	11.41	21.527			15.848
	11.483	21.61			15.852
	11.547	21.616			15.92
	11.57	21.709			15.92
	11.61	21.83			15.94
	11.681	22.165			15.99
	11.692	22.553			16.05
	11.703	22.654			16.054
	11.818	22.686			16.13
	11.823	23.1			16.17
	11.836	23.977			16.29
	11.85	24.636			16.306
	11.9	24.72			16.391
	11.908	24.849			16.45
	11.916	26.119			16.45
	12.09	26.255			16.477
	12.15	26.404			16.51
	12.22	26.9			16.541
	12.22	27.04			16.66
	12.241	28.008			16.782
	12.272	29.608			16.93
	12.328	30.81			16.94
	12.328	32.206			16.954
	12.37	34.162			17.04
	12.39	34.22			17.06
	12.394	34.888			17.169
	12.42	35.103			17.178
	12.432	39.25			17.467
	12.44	42.38			17.51
	12.44	46.227			17.64
	12.452	55.97			17.686
	12.5	56.65			17.8
	12.71				17.83
	12.79				17.841
	12.85				17.88
	12.98				18.096
	12.989				18.258
	12.99				18.386
	13.019				18.432
	13.04				18.46
	13.11				18.492
	13.12				18.499
	13.181				18.605
	13.206				18.633
	13.23				18.74
	13.238				18.781
	13.25				18.79
	13.266				18.841
	13.286				19.06
	13.492				19.08
	13.561				19.13
	13.576				19.23
	13.576				19.27
	13.584				19.42
	13.708				19.509
	13.785				19.74
	13.872				19.78
	13.97				19.82
	13.977				19.84
	14.055				19.84
	14.066				19.912
	14.094				20.049
	14.13				20.23
	14.21				20.25
	14.224				20.286
	14.28				20.31
	14.3				20.33
	14.314				20.633
	14.412				20.639
	14.47				20.672
	14.62				20.739
	14.713				20.922
	14.746				21.225
	14.75				21.869
	14.891				21.95
	15.062				22.25
	15.1				22.363
	15.32				23.127
	15.322				23.14
	15.339				23.32
	15.39				23.404
	15.655				23.46
	15.66				23.537
	15.77				23.555
	15.89				24.191
	15.96				24.52
	16.06				24.6
	16.26				25.14
	16.27				25.22
	16.28				25.557
	16.463				25.83
	16.538				25.925
	16.54				26.031
	16.672				26.28
	16.74				26.33
	16.759				26.554
	16.842				26.957
	17.095				27.38
	17.251				27.7
	17.373				28.08
	17.39				28.27
	17.545				28.579
	18.024				29.084
	18.07				29.084
	18.159				29.35
	18.27				30.37
	18.46				30.45
	18.51				30.73
	18.533				31.825
	18.995				31.92
	19.004				32.56
	19.428				32.93
	19.819				33.31
	19.919				33.655
	20.28				35.007
	20.491				35.061
	20.743				35.55
	21.229				36.02
	22.44				38.505
	24.92				41.06
	24.94				42.184
	25.102				44.204
	25.195				44.932
	25.212				45.307
	26.34				47.808
	27.656				48.479
	31.76				48.501
	32.29				49.991
	41.308				50.225
	53.058				51.659
					54.132
					54.263
					55.072
					56.019
					60.661
