# Supplementary material for: NPAS4 in the medial prefrontal cortex mediates chronic social defeat stress-induced anhedonia-like behavior and reductions in excitatory synapses
Source: eLife. 2023 Feb 13;12:e75631. doi: 10.7554/eLife.75631 (PMC9925055; doi:10.7554/eLife.75631)
Supplement: Figure 4—source data 6. — Paired-pulse ratios. [file elife-75631-fig4-data6.xlsx]

## Sheet: Sheet1
Source Data
Figure 4H
Paired-pulse Ratio
Geno type	SC shRNA		Npas4 shRNA
Experiment	Control	CSDS	Control	CSDS
Data	0.511741	0.303747	0.455951	0.353438
	0.530912	0.330334	0.504962	0.354249
	0.537965	0.460966	0.513961	0.532979
	0.559495	0.470848	0.553117	0.560821
	0.571382	0.522993	0.558198	0.573791
	0.653317	0.546352	0.560479	0.587829
	0.675871	0.558468	0.569427	0.598175
	0.70838	0.564302	0.601093	0.604119
	0.716344	0.592214	0.604666	0.643026
	0.721587	0.612336	0.612846	0.658636
	0.736151	0.625464	0.619228	0.661831
	0.736717	0.62656	0.624432	0.671176
	0.749786	0.647834	0.649365	0.678503
	0.761634	0.668201	0.667197	0.680328
	0.773515	0.68765	0.683628	0.688228
	0.779694	0.710572	0.695042	0.692883
	0.789022	0.711622	0.705003	0.702162
	0.814951	0.768302	0.710732	0.710685
	0.836716	0.780861	0.722677	0.711499
	0.848756	0.780894	0.730058	0.713467
	0.860538	0.801825	0.737099	0.726769
	0.868683	0.811973	0.739727	0.731041
	0.874132	0.828131	0.764339	0.749464
	0.883894	0.843743	0.775875	0.751606
	0.884553	0.851649	0.80841	0.754912
	0.925861	0.860271	0.818788	0.759489
	0.926352	0.862325	0.85757	0.771928
	0.927714	0.86707	0.858838	0.779018
	0.930937	0.886743	0.875069	0.78577
	0.935013	0.908107	0.890529	0.794776
	0.936045	0.909349	0.893444	0.802443
	0.94158	0.915446	0.929568	0.814367
	0.943872	0.919977	0.943866	0.836544
	0.953969	0.924329	0.94667	0.842264
	0.954492	0.93253	0.947677	0.863066
	0.974937	0.954395	0.967775	0.86383
	0.980031	0.965047	0.983497	0.894375
	0.981439	0.991168	0.995146	0.904262
	0.984685	0.994246	1.00518	0.905069
	0.985762	1.0015	1.04585	0.915562
	1.00703	1.0308	1.05849	0.922137
	1.01093	1.03847	1.06143	0.930426
	1.01131	1.04066	1.06484	0.948841
	1.02543	1.04445	1.06805	0.949897
	1.03374	1.05174	1.08607	0.9593
	1.0351	1.0778	1.11027	0.965934
	1.03862	1.08413	1.12025	0.973144
	1.04448	1.11026	1.12455	0.980485
	1.05768	1.11827	1.15294	0.987034
	1.06689	1.12052	1.17873	0.98897
	1.07051	1.14714	1.17924	0.99556
	1.07533	1.15449	1.18334	1.01291
	1.07936	1.15701	1.19303	1.0221
	1.08028	1.16013	1.2008	1.03747
	1.08346	1.18356	1.20416	1.03748
	1.08723	1.19783	1.211	1.04212
	1.08806	1.20185	1.21165	1.0449
	1.09103	1.20785	1.21631	1.05128
	1.1096	1.21883	1.22864	1.05201
	1.10963	1.21916	1.23269	1.05911
	1.10979	1.22436	1.29576	1.06737
	1.11145	1.24203	1.30301	1.07077
	1.11347	1.27236	1.3154	1.08511
	1.12506	1.27377	1.3333	1.08851
	1.13377	1.27801	1.33497	1.08852
	1.1372	1.28103	1.33692	1.08902
	1.13781	1.29009	1.34933	1.09172
	1.14099	1.29313	1.36123	1.12813
	1.15237	1.32315	1.3722	1.1362
	1.15784	1.33127	1.37398	1.20916
	1.17154	1.34481	1.40021	1.21297
	1.18055	1.36103	1.40358	1.22385
	1.18402	1.38131	1.40486	1.2368
	1.18718	1.38688	1.42903	1.25551
	1.18977	1.4177	1.43675	1.31742
	1.19603	1.41856	1.44552	1.32918
	1.20103	1.43383	1.47232	1.34135
	1.20484	1.46572	1.47852	1.35525
	1.21241	1.47129	1.48036	1.35788
	1.21312	1.48153	1.48342	1.36131
	1.2172	1.49512	1.50258	1.36424
	1.24359	1.51078	1.50668	1.36832
	1.2472	1.51593	1.50762	1.39641
	1.25388	1.51856	1.51903	1.40749
	1.26501	1.52419	1.55167	1.41115
	1.26795	1.52969	1.55475	1.44595
	1.27698	1.54253	1.56085	1.46277
	1.28828	1.55245	1.58581	1.46307
	1.29532	1.56848	1.61365	1.46584
	1.34514	1.57188	1.61939	1.48675
	1.35437	1.57199	1.62785	1.52654
	1.36399	1.59228	1.63718	1.53536
	1.37035	1.59343	1.64916	1.55985
	1.37377	1.60114	1.71663	1.57743
	1.37575	1.60745	1.72511	1.61536
	1.37616	1.65112	1.73776	1.62472
	1.3874	1.68638	1.74704	1.63625
	1.40113	1.68719	1.75215	1.64481
	1.40256	1.72721	1.76704	1.64497
	1.41949	1.72806	1.82719	1.64763
	1.43589	1.73012	1.87329	1.66207
	1.4537	1.73233	1.8927	1.68234
	1.46457	1.75065	1.89697	1.68495
	1.46567	1.75705	1.91015	1.69019
	1.47563	1.76692	1.9169	1.69174
	1.52521	1.7756	1.93927	1.69958
	1.53468	1.79154	1.94822	1.70821
	1.56221	1.79384	1.95642	1.71112
	1.56911	1.79781	1.971	1.72649
	1.59942	1.80818	2.01575	1.74202
	1.61567	1.81577	2.09223	1.74425
	1.62371	1.8211	2.09912	1.75133
	1.63046	1.82722	2.22938	1.77032
	1.64371	1.84213	2.28488	1.77884
	1.69256	1.85204	2.58341	1.78152
	1.83153	1.85284	2.95322	1.78229
	1.89986	1.85694	3.78051	1.82915
	1.90265	1.87597	4.08054	1.92902
	1.90982	1.90489		1.95994
	1.92955	1.91129		1.9834
	1.97881	1.93333		2.01642
	2.01445	1.96063		2.03194
	2.08077	1.97254		2.04482
	2.22126	2.03036		2.0589
	2.3367	2.03416		2.06725
	2.62947	2.06838		2.06928
	2.65405	2.08516		2.18301
	2.73545	2.09099		2.18333
	2.8036	2.09964		2.20147
	2.83143	2.14571		2.21498
	2.85704	2.19477		2.22098
	3.48508	2.21057		2.22227
	4.32672	2.28235		2.26486
		2.30095		2.284
		2.30569		2.29207
		2.33624		2.29772
		2.37651		2.31427
		2.38384		2.36947
		2.47204		2.44468
		2.59905		2.46422
		2.68667		2.50611
		2.70187		2.50696
		2.7444		2.51917
		2.79188		2.52433
		2.83132		2.5274
		2.83346		2.58706
		2.85177		3.23456
		2.98463		3.2362
		3.00276		3.48268
		3.03648
		3.1017
		3.25685
		3.29019
		3.31889
		3.37262
		3.60491
		3.61695
		4.41572
		4.42171
		4.90835
		4.99145
