# Supplementary material for: NPAS4 in the medial prefrontal cortex mediates chronic social defeat stress-induced anhedonia-like behavior and reductions in excitatory synapses
Source: eLife. 2023 Feb 13;12:e75631. doi: 10.7554/eLife.75631 (PMC9925055; doi:10.7554/eLife.75631)
Supplement: Figure 5—figure supplement 1—source data 1. — Differentially expression mRNA. [file elife-75631-fig5-figsupp1-data1.xlsx]

## Sheet: Sheet1
Source Data
Figure 5-figure supplement 1
gene expression
Gene expression	Npas4					Ache					Arpp21					Dhcr7					Hps4					Nflix					Sst
Geno type	SC shRNA		Npas4 shRNA			SC shRNA		Npas4 shRNA			SC shRNA		Npas4 shRNA			SC shRNA		Npas4 shRNA			SC shRNA		Npas4 shRNA			SC shRNA		Npas4 shRNA			SC shRNA		Npas4 shRNA
Experiment	Control	Acute SDS	Control	Acute SDS		Control	Acute SDS	Control	Acute SDS		Control	Acute SDS	Control	Acute SDS		Control	Acute SDS	Control	Acute SDS		Control	Acute SDS	Control	Acute SDS		Control	Acute SDS	Control	Acute SDS		Control	Acute SDS	Control	Acute SDS
Data	0.695693	1.13262	0.648277	0.393334		1.06182	1.11206	0.821604	0.64771		1.00663	0.886772	1.05166	0.83876		1.15114	1.07779	0.720453	0.56102		1.12105	1.13032	0.755334	0.772511		1.20193	0.770956	0.633661	0.522371		0.961864	1.01445	0.777945	0.761472
	0.705221	1.57124	0.903086	0.710802		0.930649	0.874585	0.605157	0.884338		0.999475	0.933721	0.928122	1.07208		0.79411	0.979878	0.645674	0.927383		0.892287	1.1962	0.435748	0.935279		0.991802	0.652914	0.632301	1.02903		0.86879	0.713004	0.80598	0.971877
	1.59909	1.3639	0.893589	0.561737		1.00753	0.793742	0.761676	0.709307		0.9939	0.796991	1.04276	1.0769		1.05475	0.768791	0.822701	0.654942		0.98666	0.935639	0.805524	0.638927		0.806264	0.640968	0.177983	0.631965		1.16935	1.25331	0.698231	0.796093
	0.908953	1.13328	0.973884	0.730468		0.788987	1.10619	0.572937	0.670446		1.08371	0.964893	1.19095	1.20842		0.831551	1.02046	0.836285	0.683839		1.03349	1.02737	1.03349	0.874605		0.93493	1.16925	0.903346	0.624537		0.860325	1.01393	0.794478	0.77805
	1.09641	1.45822	0.644394	1.08429		0.912275	0.752935	0.811282	0.821397		0.941133	1.01986	0.970535	1.06409		0.964029	0.779354	0.744617	0.805228		0.934983	0.905399	0.934983	0.812198		1.02818	0.763097	0.72855	0.833093		0.809346	0.561752	0.834905	0.914573
	0.637517	1.83444	0.782275	0.869862		1.02289	1.08426	0.936772	0.615433		1.0061	0.997028	1.04901	1.50739		1.03183	1.20972	1.01866	0.798097		1.02484	1.40116	1.02484	0.984924		0.967651	1.42898	1.03855	0.792047		0.952566	1.02875	0.777075	0.695824
	1.35712	1.14043	1.09345	0.537803		1.27585	0.833452	0.602437	0.805477		0.969056	1.02486	1.19937	1.19686		1.17259	0.937516	0.854629	1.11701		1.00668	1.07721	1.00668	1.22577		1.06924	1.1008	0.718815	1.06378		1.37776	0.813727		0.898682
