# Supplementary material for: NPAS4 in the medial prefrontal cortex mediates chronic social defeat stress-induced anhedonia-like behavior and reductions in excitatory synapses
Source: eLife. 2023 Feb 13;12:e75631. doi: 10.7554/eLife.75631 (PMC9925055; doi:10.7554/eLife.75631)
Supplement: Figure 5—source data 1. — Table for NPAS4-mediated genes. [file elife-75631-fig5-data1.xlsx]

## Sheet: Sheet1
	Statistics
MouseID	Gene	EffSize	Pval	FDR	Threshold	Direction
Spata3	SPATA3	-0.849768	1.39485e-05	0.000914562	DGE	DownReg
Defb1		-0.715987	6.08101e-06	0.000564602	DGE	DownReg
Cidea	CIDEA	-0.651276	1.47149e-05	0.00093322	DGE	DownReg
Psmb10	PSMB10	-0.602068	0.00576328	0.0381609	DGE	DownReg
Rspo3	RSPO3	-0.588884	0.00520999	0.0358415	DGE	DownReg
Arc	ARC	0.865596	0.00216386	0.0208714	DGE	UpReg
Igfn1	IGFN1	0.837555	0.000568976	0.00902872	DGE	UpReg
Schip1	IQCJ-SCHIP1	0.742388	0.00390823	0.0298574	DGE	UpReg
Apcdd1	APCDD1	0.731691	0.00503341	0.0352568	DGE	UpReg
Dapk2	DAPK2	0.706949	4.36188e-08	2.85966e-05	DGE	UpReg
