# Supplementary material for: NPAS4 in the medial prefrontal cortex mediates chronic social defeat stress-induced anhedonia-like behavior and reductions in excitatory synapses
Source: eLife. 2023 Feb 13;12:e75631. doi: 10.7554/eLife.75631 (PMC9925055; doi:10.7554/eLife.75631)
Supplement: Source data 1. [file elife-75631-data1.xlsx]

## Sheet: Sheet1
Figure	Statistical Analysis	Dependent Variable	Factor(s)	DF	F/t value	P value	n
1F	Two-way ANOVA	Npas4 mRNA level	Time course	(3, 77)	57.77	<0.0001	n=5-10/condition
			Social defeat stress condition	(2, 77)	41.13	<0.0001
			Time course x Social defeat stress condition	(6, 77)	16.6	<0.0001
		Tukey's post hoc analysis	5 min, Control versus Acute			<0.0001
			5 min, Control versus Chronic			<0.0001
			5 min, Acute versus Chronic			<0.0001
			15 min, Control versus Acute			<0.0001
			15 min, Control versus Chronic			<0.0001
			15 min, Acute versus Chronic			<0.0001
1G	Two-way ANOVA	Number of NPAS4(+) cells	Brain region	(2, 27)	1.278	0.2948	n=3-5/condition
			Social defeat stress condition	(2, 27)	9.695	0.0007
			Brain region x Social defeat stress condition	(4, 27)	0.3128	0.8669
		Tukey's post hoc analysis	Cingulate Cortex, Control versus Acute			0.0267
			Cingulate Cortex, Control versus Chronic			0.0462
			Cingulate Cortex, Acute versus Chronic			0.9136
			Prelimbic Cortex, Control versus Acute			0.0281
			Prelimbic Cortex, Control versus Chronic			0.0474
			Prelimbic Cortex, Acute versus Chronic			0.9183
			Infralimbic Cortex, Control versus Acute			0.1963
			Infralimbic Cortex, Control versus Chronic			0.4892
			Infralimbic Cortex, Acute versus Chronic			0.7273
1H	Two-way ANOVA	Number of NPAS4(+) cells	Social defeat stress condition	(2, 24)	7.3	0.0033
			CaMKIIapha(+) or (-)	(1, 24)	42.41	<0.0001
			Social defeat stress condition x CaMKIIapha(+) or (-)	(2, 24)	5.645	0.0098
		Tukey's post hoc analysis	Control versus Acute in CaMKIIapha(+) cells			0.0131
			Control versus Chronic in CaMKIIapha(+) cells			<0.0001
1I	One-way ANOVA	% of CaMKIIapha(+) cells in NPAS4 (+) cells	Social defeat stress condition	(2, 21)	0.05358	0.948	n=7-9/condition
		% of SST(+) cells in NPAS4 (+) cells	Social defeat stress condition	NA	NA	NA	n=3/condition
		% of PV(+) cells in NPAS4 (+) cells	Social defeat stress condition	(2, 8)	2.516	0.142	n=3-4/condition
2B	Paired t-test	NPAS4 (+) cells/100 mm^2	shRNA expression	(3)	3.7	0.0343	n=4/condition
2C	Two-way ANOVA	Interaction zone (sec) SC shRNA	Interaction partner	(1, 41)	46.7	<0.0001	n=18-25/condition
			Social defeat stress condition	(1, 41)	6.69	0.0133
			Interaction partner x Social defeat stress condition	(1, 41)	8.96	0.0046
		Bonferroni post hoc analysis	Interaction partner (-) versus (+) in Control no stress animals			<0.0001
			Interaction partner (-) versus (+) in CSDS animals			0.0099
			Control no stress SC shRNA animals versus CSDS SC shRNA animals in interaction partner (+)			0.0005
	Two-way ANOVA	Interaction zone (sec) Npas4 shRNA	Interaction partner	(1, 39)	42.99	<0.0001	n=19-22/condition
			Social defeat stress condition	(1, 39)	7.553	0.009
			Interaction partner x Social defeat stress condition	(1, 39)	2.988	0.0918
		Bonferroni post hoc analysis	Interaction partner (-) versus (+) in Control no stress animals			<0.0001
			Interaction partner (-) versus (+) in CSDS animals			0.0021
			Control no stress Npas4 shRNA animals versus CSDS Npas4 shRNA animals in interaction partner (+)			0.0034
2D	Two-way ANOVA	Social interaction Ratio	shRNA expression	(1, 78)	0.6587	0.4195	n=18-25/condition
			Social defeat stress condition	(1, 78)	10.01	0.0022
			shRNA expression x Social defeat stress condition	(1, 78)	0.1309	0.7185
2E	Two-way ANOVA	Avoidance corner zone (sec) SC shRNA	Interaction partner	(1, 38)	1.041	0.31	n=16-24/condition
			Social defeat stress condition	(1, 38)	17.25	0.0002
			Interaction partner x Social defeat stress condition	(1, 38)	5.541	0.0238
		Bonferroni post hoc analysis	Control no stress SC shRNA animals versus CSDS SC shRNA animals in interaction partner (+)			<0.0001
	Two-way ANOVA	Avoidance corner zone (sec) Npas4 shRNA	Interaction partner	(1, 38)	0.915	0.3448	n=19-21/condition
			Social defeat stress condition	(1, 38)	7.808	0.0081
			Interaction partner x Social defeat stress condition	(1, 38)	4.666	0.0371
		Bonferroni post hoc analysis	Control no stress Npas4 shRNA animals versus CSDS Npas4 shRNA animals in interaction partner (+)			0.0015
2F	Two-way ANOVA	Social avoidance Ratio	shRNA expression	(1, 76)	0.1132	0.7375	n=16-24/condition
			Social defeat stress condition	(1, 76)	15.64	0.0002
			shRNA expression x Social defeat stress condition	(1, 76)	0.7454	0.3906
2G	Two-way ANOVA	Sucrose Preference (%)	shRNA expression	(1, 65)	0.6727	0.4151	n=11-24/condition
			Social defeat stress condition	(1, 65)	3.11	0.0825
			shRNA expression x Social defeat stress condition	(1, 65)	5.548	0.0215
		Tukey's post hoc analysis	Control no stress animals versus CSDS animals in SC shRNA animals			0.0291
			SC shRNA versus Npas4 shRNA aniamls with CSDS			0.0492
2H	Two-way ANOVA	Open Arm (Sec)	shRNA expression	(1, 59)	0.1865	0.6674	n=14-18/condition
			Social defeat stress condition	(1, 59)	8.087	0.0061
			shRNA expression x Social defeat stress condition	(1, 59)	1.343	0.2512
3A	Three-way ANOVA	Sucrose delivery	Days for Self-administration	(4.961, 292.7)	17.35	<0.0001	n=14-18/condition
			Social defeat stress condition	(1, 59)	2.91	0.0933
			shRNA expression	(1, 59)	0.1923	0.6626
			Days x Social defeat stress condition	(8, 472)	1.194	0.3007
			Days x shRNA expression	(8, 472)	1.635	0.1124
			Social defeat stress condition x shRNA expression	(1, 59)	0.8043	0.3734
			Days x Social defeat stress condition x shRNA expression	(8, 472)	0.8151	0.5895
3B	Three-way ANOVA	Discrimination index	Days for Self-administration	(4.837, 285.4)	35.64	<0.0001	n=14-18/condition
			Social defeat stress condition	(1, 59)	0.5977	0.4426
			shRNA expression	(1, 59)	0.02777	0.8682
			Days x Social defeat stress condition	(8, 472)	1.171	0.3151
			Days x shRNA expression	(8, 472)	0.3716	0.9355
			Social defeat stress condition x shRNA expression	(1, 59)	0.2724	0.6037
			Days x Social defeat stress condition x shRNA expression	(8, 472)	1.903	0.0577
3C	Two-way ANOVA	Breakpoint	shRNA expression	(1, 58)	5.92	0.0181	n=13-19/condition
			Social defeat stress condition	(1, 58)	0.6534	0.4222
			shRNA expression x Social defeat stress condition	(1, 58)	0.1988	0.6573
3D	Two-way ANOVA	Breakpoint	shRNA expression	(1, 31)	5.685	0.0234	n=3-14/condition
			CSDS phenotype	(1, 31)	<0.0001	0.9998
			shRNA expression x CSDS phenotype	(1, 31)	4.202	0.0489
		Bonferroni post hoc analysis	SC shRNA versus Npas4 shRNA in susceptible aniamls			0.0353
			SC shRNA versus Npas4 shRNA in resilience animals			>0.9999
4B	Two-way ANOVA	Spines/mm	shRNA expression	(1, 162)	8.715	0.0036	n=34(8)-55(8)/condition
			Social defeat stress condition	(1, 162)	2.194	0.1405
			shRNA expression x Social defeat stress condition	(1, 162)	9.864	0.002
		Tukey's post hoc analysis	Control no stress versus CSDS in SC shRNA animals			0.0056
			Control no stress versus CSDS in Npas4 shRNA animals			0.6603
			SC shRNA versus Npas4 shRNA in CSDS animals			<0.0001
4C	Two-way ANOVA	Inter-event Intervals	shRNA expression	(1, 4251)	25.25	<0.0001	n=648events/6 neurons/2 animals-1240/12/4/condition
			Social defeat stress condition	(1, 4251)	38.8	<0.0001
			shRNA expression x Social defeat stress condition	(1, 4251)	14.57	<0.0001
		Tukey's post hoc analysis	No stress control versus CSDS in SC shRNA animals			<0.0001
			SC shRNA versus Npas4 shRNA aniamls with CSDS			<0.0001
4E	Two-way ANOVA	mAMPA Amplitude	shRNA expression	(1, 4301)	90.91	<0.0001	n=654events/6 neurons/2 animals-1253/12/4/condition
			Social defeat stress condition	(1, 4301)	0.1167	0.7327
			shRNA expression x Social defeat stress condition	(1, 4301)	6.992	0.0082
		Tukey's post hoc analysis	SC shRNA versus Npas4 shRNA aniamls with no stress condistion			<0.0001
			SC shRNA versus Npas4 shRNA aniamls with CSDS			<0.0001
4G	Two-way ANOVA	Paird-Pulse Ratio	shRNA expression	(1, 561)	3.91	0.0485	n=133events/10 neurons/3 animals-191/17/5/condition
			Social defeat stress condition	(1, 561)	11.33	0.0008
			shRNA expression x Social defeat stress condition	(1, 561)	5.883	0.0156
		Tukey's post hoc analysis	Control no stress animals versus CSDS animals in SC shRNA animals			0.0002
			SC shRNA versus Npas4 shRNA animals with CSDS			0.0056
Figure	Statistical Analysis	Dependent Variable	Factor(s)	DF	F/t value	P value	n
Figure 1 supplement 1A	Two-way ANOVA	Npas4 mRNA level	Time course	(2, 52)	53.12	<0.0001	n=5-10/condition
			Social defeat stress condition	(2, 52)	8.371	<0.0001
			Time course x Social defeat stress condition	(4, 52)	13.77	0.0007
		Tukey's post hoc analysis	15 min, Control versus Acute			<0.0001
			15 min, Control versus Chronic			<0.0001
			15 min, Acute versus Chronic			0.5356
Figure 1 supplement 1B	Two-way ANOVA	cFos mRNA level	Time course	(2, 58)	44.41	<0.0001	n=5-10/condition
			Social defeat stress condition	(2, 58)	45.37	<0.0001
			Time course x Social defeat stress condition	(4, 58)	10.38	<0.0001
		Tukey's post hoc analysis	15 min, Control versus Acute			<0.0001
			15 min, Control versus Chronic			<0.0001
			15 min, Acute versus Chronic			0.0021
			1 h, Control versus Acute			<0.0001
			1 h, Control versus Chronic			<0.0001
			1 h, Acute versus Chronic			0.0055
Figure 1 supplement 1C	One-way ANOVA	NPAS4 signal intensity	Social defeat stress condition	(2, 214)	12.1	<0.0001	n=45(3)-87(5)/condition
		Tukey's post hoc analysis	Control versus Acute			0.0002
			Control versus Chronic			0.8222
			Acute versus Chronic			0.0001
Figure 2 supplement 1	Two-way ANOVA	Water consumption (mL)	Genotype	(1, 65)	0.4115	0.5234	n=11-24/condition
			Social defeat stress condition	(1, 65)	2.974	0.0894
			Genotyper x Social defeat stress condition	(1, 65)	0.1547	0.6954
	Two-way ANOVA	Sucrose consumption (mL)	Genotype	(1, 65)	0.1523	0.6976
			Social defeat stress condition	(1, 65)	0.01496	0.903
			Genotyper x Social defeat stress condition	(1, 65)	12.63	0.0007
		Tukey's post hoc analysis	Control no stress animals versus CSDS animals in SC shRNA animals			0.0624
			SC shRNA versus Npas4 shRNA animals with CSDS			0.0504
Figure 4 supplement 1	Two-way ANOVA	Spine Head Diameter	shRNA expression	(1, 162)	0.07993	0.7778	n=34(8)-55(8)/condition
			Social defeat stress condition	(1, 162)	0.6409	0.4246
			shRNA expression x Social defeat stress condition	(1, 162)	0.06676	0.7687
Figure 5 supplement 1	Two-way ANOVA	Npas4 mRNA level	Genotype	(1, 24)	16.73	0.0004	n = 7/condition
			Acute Social defeat stress	(1, 24)	1.244	0.2757
			Time course x Social defeat stress condition	(1, 24)	6.736	0.0159
		Tukey's post hoc analysis	SC shRNA versus Npas4 shRNA aniamls with acute social defeat			0.0005
		Ache mRNA level	Genotype	(1, 24)	20	0.0002
			Acute Social defeat stress	(1, 24)	0.2962	0.5913
			Time course x Social defeat stress condition	(1, 24)	0.4343	0.5162
		Arpp21 mRNA level	Genotype	(1, 24)	7.433	0.0118
			Acute Social defeat stress	(1, 24)	0.05771	0.8122
			Time course x Social defeat stress condition	(1, 24)	1.95	0.1754
		Dhcr7 mRNA level	Genotype	(1, 24)	10	0.0042
			Acute Social defeat stress	(1, 24)	0.1554	0.6969
			Time course x Social defeat stress condition	(1, 24)	0.02572	0.8739
		Hps4 mRNA level	Genotype	(1, 24)	7.36	0.0121
			Acute Social defeat stress	(1, 24)	1.055	0.3146
			Time course x Social defeat stress condition	(1, 24)	0.2254	0.6392
		Nfix mRNA level	Genotype	(1, 24)	6.568	0.0171
			Acute Social defeat stress	(1, 24)	0.02334	0.8799
			Time course x Social defeat stress condition	(1, 24)	0.8302	0.3713
		Sst mRNA level	Genotype	(1, 23)	5.496	0.0281
			Acute Social defeat stress	(1, 23)	0.07982	0.7801
			Time course x Social defeat stress condition	(1, 23)	1.106	0.3039
