# Supplementary material for: NPAS4 in the medial prefrontal cortex mediates chronic social defeat stress-induced anhedonia-like behavior and reductions in excitatory synapses
Source: eLife. 2023 Feb 13;12:e75631. doi: 10.7554/eLife.75631 (PMC9925055; doi:10.7554/eLife.75631)
Supplement: Supplementary file 1. [file elife-75631-supp1.xlsx]

## Sheet: Sheet 1
	Statistics						SFARI database		Gandal et al. 2018 - DGE						Gandal et al. 2018 - Modules
MouseID	Gene	EffSize	Pval	FDR	Threshold	Direction	ASD_SC	ASD	ASD.DGE_down	ASD.DGE_up	BD.DGE_down	BD.DGE_up	SCZ.DGE_down	SCZ.DGE_up	geneM0	geneM1	geneM10	geneM11	geneM12	geneM13	geneM14	geneM15	geneM16	geneM17	geneM18	geneM19	geneM2	geneM20	geneM21	geneM22	geneM23	geneM24	geneM25	geneM26	geneM27	geneM28	geneM29	geneM3	geneM30	geneM31	geneM32	geneM33	geneM34	geneM4	geneM5	geneM6	geneM7	geneM8	geneM9
2410015M20Rik		-0.414099	0.0019761	0.0197256	DGE	DownReg
A730015C16Rik		0.768171	0.00431588	0.031788	DGE	UpReg
Abca9	ABCA9	0.407004	0.0015555	0.0169545	DGE	UpReg																																										geneM8
Abhd13	ABHD13	0.368035	0.000248137	0.00533159	DGE	UpReg																		geneM17
Abhd2	ABHD2	0.477749	0.00739835	0.0446216	DGE	UpReg				ASD.DGE_up																												geneM3
AC124992.1		-0.4389	0.000158454	0.00416433	DGE	DownReg
AC129188.1		0.304345	0.00221445	0.0211805	DGE	UpReg
AC163993.2		0.359497	0.00101379	0.0130388	DGE	UpReg
AC164564.3		-0.51019	6.71826e-05	0.00245529	DGE	DownReg
Acap2	ACAP2	0.451384	0.00371162	0.0290798	DGE	UpReg																																geneM3
Actr3	ACTR3	0.322995	0.00575827	0.0381488	DGE	UpReg																			geneM18
Acvr1c	ACVR1C	0.323104	0.0037441	0.0291998	DGE	UpReg										geneM1
Acyp2	ACYP2	0.442811	0.00509629	0.0354041	DGE	UpReg			ASD.DGE_down				SCZ.DGE_down		geneM0
Adam22	ADAM22	0.323606	0.00612955	0.0395324	DGE	UpReg			ASD.DGE_down							geneM1
Adgrb3	ADGRB3	0.381797	0.00675658	0.0422299	DGE	UpReg								SCZ.DGE_up
Adra1d	ADRA1D	0.515557	0.00026212	0.00554769	DGE	UpReg			ASD.DGE_down				SCZ.DGE_down			geneM1
Adrb1	ADRB1	0.396254	7.62875e-06	0.000646918	DGE	UpReg									geneM0
Aggf1	AGGF1	0.335937	0.000651071	0.009704	DGE	UpReg												geneM11
Agps	AGPS	0.311368	0.00378872	0.0294755	DGE	UpReg																			geneM18
Ahctf1	AHCTF1	0.384277	0.000198849	0.00470141	DGE	UpReg																																							geneM5
Akap10	AKAP10	0.332386	0.00444588	0.0324264	DGE	UpReg										geneM1
Akap6	AKAP6	0.377362	0.00038557	0.00703243	DGE	UpReg			ASD.DGE_down							geneM1
Akirin1	AKIRIN1	0.354698	0.000565535	0.0090217	DGE	UpReg									geneM0
Alad	ALAD	-0.300134	0.00486072	0.0344485	DGE	DownReg																					geneM2
Ankmy1	ANKMY1	-0.448095	0.00507567	0.0354041	DGE	DownReg							SCZ.DGE_down																															geneM4
Ankrd33b	ANKRD33B	0.463174	1.48181e-06	0.000237505	DGE	UpReg										geneM1
Ankrd34a	ANKRD34A	0.317672	0.00127969	0.015044	DGE	UpReg										geneM1
Ankrd63	ANKRD63	0.339905	0.000530679	0.00858809	DGE	UpReg									geneM0
Ano3	ANO3	0.457628	8.17844e-05	0.00271618	DGE	UpReg										geneM1
Anxa11	ANXA11	0.330308	0.000768859	0.0107942	DGE	UpReg										geneM1
Ap4b1	AP4B1	-0.311685	0.00423701	0.0314438	DGE	DownReg									geneM0
Apcdd1	APCDD1	0.731691	0.00503341	0.0352568	DGE	UpReg																																geneM3
Arc	ARC	0.865596	0.00216386	0.0208714	DGE	UpReg							SCZ.DGE_down																geneM21
Arf2	ARL17A	0.311806	0.00292083	0.0250635	DGE	UpReg									geneM0
Arf2	ARL17B	0.311806	0.00292083	0.0250635	DGE	UpReg									geneM0
Arhgap32	ARHGAP32	0.390423	1.20643e-09	5.11528e-06	DGE	UpReg	ASD_SC	ASD						SCZ.DGE_up		geneM1
Arhgef3	ARHGEF3	0.348037	4.93033e-05	0.00199091	DGE	UpReg								SCZ.DGE_up		geneM1
Arl4d	ARL4D	0.444172	0.000179338	0.00442613	DGE	UpReg					BD.DGE_down		SCZ.DGE_down																geneM21
Arnt2	ARNT2	0.384076	0.005969	0.0389534	DGE	UpReg	ASD_SC	ASD							geneM0
Arpp21	ARPP21	0.432236	0.0001288	0.00373198	DGE	UpReg																																										geneM8
Asap2	ASAP2	0.315675	0.000580665	0.00913683	DGE	UpReg							SCZ.DGE_down																									geneM3
Asic2	ASIC2	0.360579	0.00847692	0.0485566	DGE	UpReg																	geneM16
Atoh8	ATOH8	0.576786	0.00292407	0.0250635	DGE	UpReg																																							geneM5
Atp1a1	ATP1A1	0.419398	0.00115127	0.0140739	DGE	UpReg			ASD.DGE_down																																						geneM7
Atp5e	ATP5F1E	-0.424284	0.000687038	0.0100756	DGE	DownReg
Atp5g2		-0.307757	0.000241747	0.00522963	DGE	DownReg
Atp5j2	ATP5MF	-0.339507	0.000438076	0.00753017	DGE	DownReg
Atp6v0c	ATP6V0C	0.348998	0.00180797	0.0185463	DGE	UpReg																																									geneM7
Atxn1	ATXN1	0.379041	0.000449942	0.00768223	DGE	UpReg									geneM0
Aurkaip1	AURKAIP1	-0.359755	0.000425026	0.00747763	DGE	DownReg									geneM0
B3gnt9	B3GNT9	-0.3347	0.000516454	0.00843169	DGE	DownReg								SCZ.DGE_up													geneM2
Baz1a	BAZ1A	-0.367509	0.00289507	0.0249752	DGE	DownReg				ASD.DGE_up																																			geneM5
Bhlhe40	BHLHE40	0.526471	0.000267474	0.00561431	DGE	UpReg								SCZ.DGE_up		geneM1
Bivm	BIVM	0.355991	0.00786555	0.0462041	DGE	UpReg																																										geneM8
Bivm	BIVM-ERCC5	0.355991	0.00786555	0.0462041	DGE	UpReg									geneM0
Bivm	ERCC5	0.355991	0.00786555	0.0462041	DGE	UpReg								SCZ.DGE_up				geneM11
Bloc1s1	BLOC1S1	-0.478054	0.000234504	0.0051641	DGE	DownReg							SCZ.DGE_down																													geneM33
Bmi1	BMI1	0.338318	0.00402192	0.0304336	DGE	UpReg									geneM0
Bmi1	COMMD3-BMI1	0.338318	0.00402192	0.0304336	DGE	UpReg																					geneM2
Bola1	BOLA1	-0.425992	0.000240441	0.00522439	DGE	DownReg									geneM0
Bola2	BOLA2	-0.31146	0.00258894	0.0234889	DGE	DownReg									geneM0
Bola2	BOLA2B	-0.31146	0.00258894	0.0234889	DGE	DownReg																geneM15
Brinp2	BRINP2	0.368099	7.45789e-05	0.00259325	DGE	UpReg																																geneM3
Btbd10	BTBD10	0.358302	1.4555e-05	0.000931914	DGE	UpReg										geneM1
Btbd3	BTBD3	0.404266	2.98033e-07	8.61587e-05	DGE	UpReg										geneM1
Bzrap1		0.410759	0.000193184	0.00465398	DGE	UpReg
Cacna2d1	CACNA2D1	0.308878	5.5017e-06	0.000559497	DGE	UpReg										geneM1
Capns1	CAPNS1	-0.345706	0.000102715	0.00321017	DGE	DownReg									geneM0
Card10	CARD10	-0.302925	0.00020579	0.00479837	DGE	DownReg																												geneM26
Carnmt1	CARNMT1	0.407056	0.00650132	0.0411222	DGE	UpReg
Cav1	CAV1	0.554475	0.00281201	0.0245665	DGE	UpReg																													geneM27
Cbl	CBL	0.314483	0.00710968	0.0434367	DGE	UpReg				ASD.DGE_up							geneM10
Ccbl1		-0.326677	1.87662e-05	0.00107043	DGE	DownReg
Ccdc107	CCDC107	-0.337359	0.000965538	0.012605	DGE	DownReg									geneM0
Ccdc12	CCDC12	-0.474158	0.000384848	0.00703243	DGE	DownReg									geneM0
Ccdc141	CCDC141	0.39945	0.00851573	0.048727	DGE	UpReg																					geneM2
Ccdc152	CCDC152	-0.305695	0.000165945	0.00429029	DGE	DownReg									geneM0
Ccdc183		-0.428009	0.000199729	0.00470472	DGE	DownReg
Ccdc191	CCDC191	-0.333567	0.00679012	0.0422509	DGE	DownReg
Ccdc85a	CCDC85A	0.388495	0.000118008	0.00354023	DGE	UpReg									geneM0
Ccng2	CCNG2	0.508925	0.000543991	0.00873683	DGE	UpReg									geneM0
Ccni	CCNI	0.382385	0.00195553	0.0196143	DGE	UpReg																																									geneM7
Ccny	CCNY	0.309457	0.000512337	0.00843069	DGE	UpReg									geneM0
Ccp110	CCP110	0.571296	0.00325023	0.0266729	DGE	UpReg																					geneM2
Cd300d		0.505983	0.00805933	0.0470168	DGE	UpReg
Cdh11	CDH11	0.46773	0.000326588	0.00640092	DGE	UpReg		ASD																														geneM3
Cdh20	CDH20	0.332184	0.00753575	0.0452199	DGE	UpReg								SCZ.DGE_up																								geneM3
Cdh8	CDH8	0.341808	0.00110804	0.0137264	DGE	UpReg	ASD_SC	ASD								geneM1
Cdk19	CDK19	0.317498	0.000406677	0.00723978	DGE	UpReg																					geneM2
Cebpa	CEBPA	0.541964	1.45795e-05	0.000931914	DGE	UpReg									geneM0
Cemip	CEMIP	0.323331	0.0051535	0.0355877	DGE	UpReg
Cenpc1	CENPC	0.544169	0.000842105	0.0114685	DGE	UpReg									geneM0
Cenpm	CENPM	-0.308729	0.00502265	0.035235	DGE	DownReg									geneM0
Cenpp	CENPP	-0.396355	0.00629107	0.0401714	DGE	DownReg									geneM0
Chchd1	CHCHD1	-0.325657	3.1648e-05	0.00148168	DGE	DownReg									geneM0
Chd3os		0.391752	0.000142231	0.0039258	DGE	UpReg
Chrdl1	CHRDL1	0.438978	0.00604019	0.039246	DGE	UpReg						BD.DGE_up		SCZ.DGE_up																								geneM3
Churc1	CHURC1	-0.303572	3.29022e-06	0.00041031	DGE	DownReg									geneM0
Cidea	CIDEA	-0.651276	1.47149e-05	0.00093322	DGE	DownReg			ASD.DGE_down																		geneM2
Clec4a2	CLEC4C	-0.360119	0.00028292	0.00583498	DGE	DownReg
Cmtm5	CMTM5	-0.320063	0.00161269	0.0173401	DGE	DownReg							SCZ.DGE_down														geneM2
Cnksr2	CNKSR2	0.382519	3.85308e-07	9.80223e-05	DGE	UpReg								SCZ.DGE_up		geneM1
Cntn4	CNTN4	0.377925	0.00556964	0.0373659	DGE	UpReg	ASD_SC	ASD								geneM1
Cntnap5a		-0.302368	0.00373459	0.0291614	DGE	DownReg
Col4a3bp	CERT1	0.350504	0.00500368	0.0351252	DGE	UpReg
Copz2	COPZ2	-0.385798	0.00553363	0.037243	DGE	DownReg																																geneM3
Coq10b	COQ10B	0.37847	0.000251528	0.00536833	DGE	UpReg										geneM1
Cort	CORT	-0.47263	0.000342636	0.00655389	DGE	DownReg							SCZ.DGE_down																		geneM23
Cox11	COX11	0.326594	0.00408086	0.0306788	DGE	UpReg										geneM1
Cox6a2	COX6A2	-0.387842	0.00324345	0.0266344	DGE	DownReg									geneM0
Cpne4	CPNE4	0.487138	1.94238e-08	2.64076e-05	DGE	UpReg										geneM1
Crlf2	CRLF2	-0.347793	0.00102386	0.0130814	DGE	DownReg
Crybb1	CRYBB1	-0.37505	0.00382756	0.0296147	DGE	DownReg							SCZ.DGE_down																															geneM4
Csrp2	CSRP2	-0.318255	8.85071e-06	0.000699261	DGE	DownReg																																geneM3
Cuta	CUTA	-0.336223	0.00491027	0.0347185	DGE	DownReg																					geneM2
Cwf19l2	CWF19L2	-0.343642	0.0022762	0.0215668	DGE	DownReg								SCZ.DGE_up				geneM11
Daglb	DAGLB	-0.314061	0.00163514	0.0174261	DGE	DownReg														geneM13
Dapk2	DAPK2	0.706949	4.36188e-08	2.85966e-05	DGE	UpReg																					geneM2
Dbh	DBH	0.507759	0.00176156	0.018315	DGE	UpReg										geneM1
Dcaf6	DCAF6	0.330088	8.97122e-05	0.00289629	DGE	UpReg										geneM1
Dcdc2a	DCDC2	-0.302721	0.00037786	0.00696577	DGE	DownReg						BD.DGE_up		SCZ.DGE_up	geneM0
Dcps	DCPS	-0.340759	0.00115291	0.0140739	DGE	DownReg									geneM0
Dcxr	DCXR	-0.343132	0.00669034	0.0419171	DGE	DownReg								SCZ.DGE_up																								geneM3
Ddx3x	DDX3X	0.366929	0.00111041	0.0137264	DGE	UpReg	ASD_SC	ASD							geneM0
Ddx5	DDX5	0.353131	0.00611026	0.0394931	DGE	UpReg																						geneM20
Defb1		-0.715987	6.08101e-06	0.000564602	DGE	DownReg
Dgkb	DGKB	0.511214	0.00807376	0.0470445	DGE	UpReg										geneM1
Dgkz	DGKZ	0.330792	9.08306e-07	0.000183391	DGE	UpReg		ASD					SCZ.DGE_down						geneM12
Dlgap2	DLGAP2	0.309686	2.33127e-08	2.64076e-05	DGE	UpReg	ASD_SC	ASD								geneM1
Dlx6	DLX6	-0.316159	0.00876528	0.0496411	DGE	DownReg	ASD_SC	ASD																							geneM23
Dnajb9	DNAJB9	0.388913	0.00226226	0.0214907	DGE	UpReg									geneM0
Dnajc4	DNAJC4	-0.304604	3.60381e-05	0.00163133	DGE	DownReg							SCZ.DGE_down		geneM0
Dohh	DOHH	-0.320329	0.00590946	0.0387907	DGE	DownReg																					geneM2
Dpm3	DPM3	-0.475708	0.00290425	0.0250285	DGE	DownReg																geneM15
Dpp8	DPP8	0.39224	0.00309211	0.0259615	DGE	UpReg			ASD.DGE_down																																			geneM4
Dram1	DRAM1	0.466196	0.00306364	0.0258299	DGE	UpReg								SCZ.DGE_up																															geneM5
Drd2	DRD2	-0.405409	0.00420378	0.0312702	DGE	DownReg		ASD							geneM0
Dus2	DUS2	-0.384151	0.000362018	0.00683214	DGE	DownReg																																						geneM4
Dusp1	DUSP1	0.358313	0.00147214	0.0163664	DGE	UpReg							SCZ.DGE_down		geneM0
Dusp23	DUSP23	-0.319537	0.000728637	0.0104467	DGE	DownReg									geneM0
Dusp5	DUSP5	0.368743	0.000177428	0.00440797	DGE	UpReg																																							geneM5
Dzank1	DZANK1	0.398119	0.00490951	0.0347185	DGE	UpReg									geneM0
Ebp		-0.300728	5.80001e-06	0.000559497	DGE	DownReg
Edil3	EDIL3	0.615971	0.00102782	0.0130946	DGE	UpReg							SCZ.DGE_down														geneM2
Eef2kmt	EEF2KMT	-0.354529	0.000310038	0.006162	DGE	DownReg
Eef2kmt	FAM86B1	-0.354529	0.000310038	0.006162	DGE	DownReg									geneM0
Eef2kmt	FAM86B2	-0.354529	0.000310038	0.006162	DGE	DownReg									geneM0
Egln1	EGLN1	0.315715	7.8038e-06	0.00065738	DGE	UpReg																					geneM2
Egr1	EGR1	0.422129	0.00543648	0.0369014	DGE	UpReg							SCZ.DGE_down																geneM21
Eif2s3x	EIF2S3	0.440652	0.00882751	0.0498384	DGE	UpReg									geneM0
Eif2s3x	EIF2S3B	0.440652	0.00882751	0.0498384	DGE	UpReg
Eif4g2	EIF4G2	0.32411	0.00712753	0.043489	DGE	UpReg					BD.DGE_down		SCZ.DGE_down		geneM0
Elovl2	ELOVL2	0.403579	0.000208686	0.00483512	DGE	UpReg																																geneM3
Emc9	EMC9	-0.397345	1.28646e-07	5.11367e-05	DGE	DownReg									geneM0
Eme1	EME1	-0.301008	0.000632358	0.00961951	DGE	DownReg									geneM0
Enc1	ENC1	0.320657	1.35047e-05	0.000894689	DGE	UpReg										geneM1
Endog	ENDOG	-0.341777	0.000190899	0.00462521	DGE	DownReg									geneM0
Eno3	ENO3	-0.39337	0.00580764	0.0383359	DGE	DownReg									geneM0
Epc2	EPC2	0.34964	0.00468456	0.0337224	DGE	UpReg	ASD_SC	ASD					SCZ.DGE_down		geneM0
Epg5	EPG5	0.369423	0.00337854	0.0273205	DGE	UpReg										geneM1
Epha4	EPHA4	0.441855	0.0049235	0.0347734	DGE	UpReg										geneM1
Erc2	ERC2	0.363432	0.000516484	0.00843169	DGE	UpReg							SCZ.DGE_down										geneM16
Esyt2	ESYT2	0.305924	0.00597469	0.0389534	DGE	UpReg									geneM0
Etfb	ETFB	-0.449445	0.000517026	0.00843169	DGE	DownReg	ASD_SC	ASD																			geneM2
Fam162a	FAM162A	-0.319045	0.000283033	0.00583498	DGE	DownReg									geneM0
Fam179b		0.361754	0.00553374	0.037243	DGE	UpReg
Fam46a		-0.338944	0.000617485	0.00948599	DGE	DownReg
Fam73a		0.373732	0.00103329	0.0131303	DGE	UpReg
Fam84a		0.382317	0.00682008	0.0423082	DGE	UpReg
Fam91a1	FAM91A1	0.348206	0.00413283	0.0308963	DGE	UpReg																																									geneM7
Fancc	FANCC	-0.303261	8.62982e-08	4.56091e-05	DGE	DownReg			ASD.DGE_down						geneM0
Fat3	FAT3	0.487565	0.00105701	0.0132989	DGE	UpReg																																										geneM8
Fau	FAU	-0.308014	0.00086922	0.0117372	DGE	DownReg																geneM15
Fbln1	FBLN1	-0.330362	0.000405218	0.00722913	DGE	DownReg								SCZ.DGE_up																								geneM3
Fbn1	FBN1	-0.530335	0.00396426	0.0301768	DGE	DownReg	ASD_SC	ASD																																				geneM4
Fbxl5	FBXL5	0.312582	0.00205976	0.0202162	DGE	UpReg																					geneM2
Fdps	FDPS	-0.479602	0.00189042	0.019145	DGE	DownReg									geneM0
Fgf13		0.521939	0.00540885	0.0367787	DGE	UpReg
Fgf14	FGF14	0.378325	0.000363054	0.00684154	DGE	UpReg			ASD.DGE_down							geneM1
Fgf18	FGF18	-0.414459	0.000772712	0.0108166	DGE	DownReg										geneM1
Fhod3	FHOD3	0.400026	0.00601359	0.0391483	DGE	UpReg																																										geneM8
Flrt2	FLRT2	0.361745	2.90464e-07	8.59232e-05	DGE	UpReg									geneM0
Flrt3	FLRT3	0.346401	0.000663408	0.00981226	DGE	UpReg										geneM1
Fos	FOS	0.306026	0.0027552	0.0242702	DGE	UpReg																																							geneM5
Foxk2	FOXK2	0.365779	1.77793e-05	0.0010374	DGE	UpReg										geneM1
Foxo3	FOXO3	0.304132	0.00219727	0.0210938	DGE	UpReg						BD.DGE_up		SCZ.DGE_up		geneM1
Frmpd4	FRMPD4	0.328018	0.00031514	0.00622451	DGE	UpReg		ASD								geneM1
Fry	FRY	0.336173	0.00163191	0.0174261	DGE	UpReg										geneM1
Fstl1	FSTL1	-0.425691	9.80027e-05	0.00309329	DGE	DownReg								SCZ.DGE_up																								geneM3
Fxyd1	FXYD1	-0.462409	0.00135357	0.0156284	DGE	DownReg								SCZ.DGE_up																								geneM3
Fzd9	FZD9	-0.503342	0.00141755	0.0160563	DGE	DownReg								SCZ.DGE_up																								geneM3
Gabra1	GABRA1	0.408989	0.00129198	0.0151605	DGE	UpReg		ASD	ASD.DGE_down							geneM1
Gadd45gip1	GADD45GIP1	-0.344168	0.00702942	0.0431331	DGE	DownReg								SCZ.DGE_up	geneM0
Galnt13	GALNT13	0.417329	0.00083942	0.0114442	DGE	UpReg	ASD_SC	ASD																			geneM2
Ganc	GANC	-0.336216	0.00635608	0.0404651	DGE	DownReg									geneM0
Gdpgp1	GDPGP1	0.300458	0.00330643	0.0269387	DGE	UpReg									geneM0
Gins2	GINS2	0.337975	0.000289688	0.00592416	DGE	UpReg						BD.DGE_up		SCZ.DGE_up																								geneM3
Glrb	GLRB	0.316045	0.000258226	0.00549269	DGE	UpReg										geneM1
Gls	GLS	0.542178	0.00220926	0.021161	DGE	UpReg										geneM1
Gm11110		-1.3579	0.00276731	0.0243234	DGE	DownReg
Gm16485		0.595745	4.14164e-05	0.00179801	DGE	UpReg
Gm20939		1.22011	0.000125897	0.00366455	DGE	UpReg
Gm47283		-0.514946	0.000294203	0.0059519	DGE	DownReg
Gm9843		-0.840496	8.10048e-05	0.00270441	DGE	DownReg
Gna15	GNA15	-0.448688	0.000130744	0.00376257	DGE	DownReg										geneM1
Gnai3	GNAI3	0.382061	0.00707974	0.043337	DGE	UpReg				ASD.DGE_up				SCZ.DGE_up																															geneM5
Golph3	GOLPH3	0.427046	0.0011875	0.0143311	DGE	UpReg																																					geneM34
Gpaa1	GPAA1	-0.336053	0.00059838	0.00931626	DGE	DownReg																					geneM2
Gpm6a	GPM6A	0.312884	0.0057431	0.0381275	DGE	UpReg																																geneM3
Gpr155	GPR155	0.350706	0.00116074	0.0141154	DGE	UpReg										geneM1
Gpr158	GPR158	0.352618	4.28263e-05	0.00181797	DGE	UpReg			ASD.DGE_down							geneM1
Gpr26	GPR26	0.452553	9.879e-07	0.000193324	DGE	UpReg									geneM0
Gpr88	GPR88	0.482155	0.00228104	0.0215668	DGE	UpReg								SCZ.DGE_up																										geneM31
Gpsm2	GPSM2	0.336134	0.00138078	0.0157902	DGE	UpReg							SCZ.DGE_down														geneM2
Gpx7	GPX7	-0.355072	8.59783e-06	0.000688015	DGE	DownReg																																geneM3
Grcc10	C12orf57	-0.358518	2.24754e-07	7.36281e-05	DGE	DownReg	ASD_SC	ASD														geneM15
Grin2a	GRIN2A	0.325442	5.88181e-07	0.00013603	DGE	UpReg	ASD_SC	ASD	ASD.DGE_down							geneM1
Grtp1	GRTP1	-0.372218	2.63925e-05	0.00134285	DGE	DownReg																																geneM3
Gse1	GSE1	0.348362	2.29025e-05	0.00122476	DGE	UpReg							SCZ.DGE_down			geneM1
Gsto1	GSTO1	-0.328383	2.16046e-05	0.00116941	DGE	DownReg																					geneM2
Gucy1a3		0.397594	1.0064e-05	0.000745638	DGE	UpReg
Gucy1b3		0.390174	0.00608049	0.0393808	DGE	UpReg
H2-Ke6	HSD17B8	-0.308262	1.34437e-05	0.000894689	DGE	DownReg																																						geneM4
Hecw2	HECW2	0.305607	0.000321479	0.00633986	DGE	UpReg	ASD_SC	ASD					SCZ.DGE_down														geneM2
Hint2	HINT2	-0.321638	0.00427378	0.0316429	DGE	DownReg																																						geneM4
Hist1h4i		0.62525	0.00272221	0.0241591	DGE	UpReg
Hivep1	HIVEP1	0.412327	0.00117967	0.0142908	DGE	UpReg									geneM0
Hkdc1	HKDC1	0.41816	0.00876914	0.0496411	DGE	UpReg																																geneM3
Hscb	HSCB	-0.309616	0.00123947	0.0147761	DGE	DownReg									geneM0
Hsf4	HSF4	-0.391199	0.000759459	0.0107273	DGE	DownReg														geneM13
Hspa12a	HSPA12A	0.390337	0.000698371	0.0101872	DGE	UpReg										geneM1
Htr1b	HTR1B	0.419075	3.08273e-05	0.00147971	DGE	UpReg	ASD_SC	ASD								geneM1
Htr7	HTR7	0.334792	4.29614e-05	0.00181797	DGE	UpReg		ASD			BD.DGE_down				geneM0
Idnk	IDNK	-0.348422	0.00216916	0.020887	DGE	DownReg																																						geneM4
Ift20	IFT20	-0.310779	0.00720395	0.0437919	DGE	DownReg																																										geneM8
Igfn1	IGFN1	0.837555	0.000568976	0.00902872	DGE	UpReg									geneM0
Ing1	ING1	0.330789	0.00147581	0.0163664	DGE	UpReg				ASD.DGE_up		BD.DGE_up		SCZ.DGE_up						geneM13
Ino80b	INO80B	-0.321149	0.000688338	0.0100756	DGE	DownReg						BD.DGE_up			geneM0
Ino80b	INO80B-WBP1	-0.321149	0.000688338	0.0100756	DGE	DownReg
Insc	INSC	-0.402294	4.44367e-06	0.000489037	DGE	DownReg									geneM0
Insm1	INSM1	0.305377	0.00763828	0.0454015	DGE	UpReg									geneM0
Ipcef1	IPCEF1	0.36185	0.000966187	0.012605	DGE	UpReg										geneM1
Iqcd	IQCD	-0.357944	0.00302277	0.0255989	DGE	DownReg									geneM0
Iqgap2	IQGAP2	0.390293	0.00236038	0.0220765	DGE	UpReg									geneM0
Itgav	ITGAV	0.573397	0.00778916	0.0460614	DGE	UpReg				ASD.DGE_up																												geneM3
Kalrn	KALRN	0.359698	0.00206491	0.0202354	DGE	UpReg			ASD.DGE_down							geneM1
Kcnj12	KCNJ12	0.314934	0.00494453	0.0348253	DGE	UpReg		ASD							geneM0
Kcnj12	KCNJ18	0.314934	0.00494453	0.0348253	DGE	UpReg
Kcnj2	KCNJ2	0.323922	0.00249722	0.0229017	DGE	UpReg		ASD																			geneM2
Kcnj3	KCNJ3	0.307353	1.81911e-05	0.00105658	DGE	UpReg										geneM1
Kcnk9	KCNK9	0.347111	0.00471908	0.0339518	DGE	UpReg										geneM1
Kcnq5	KCNQ5	0.342982	5.93806e-06	0.000559497	DGE	UpReg			ASD.DGE_down							geneM1
Kcnv1	KCNV1	0.440938	0.00344831	0.0275865	DGE	UpReg										geneM1
Kctd1	KCTD1	0.343173	0.000110503	0.00337885	DGE	UpReg										geneM1
Kctd16	KCTD16	0.330224	0.00168269	0.0178102	DGE	UpReg								SCZ.DGE_up		geneM1
Kctd3	KCTD3	0.338717	0.00191062	0.0192729	DGE	UpReg																																							geneM5
Kdelc2		0.420747	0.00135389	0.0156284	DGE	UpReg
Kitl	KITLG	0.364151	0.00531411	0.0362966	DGE	UpReg																																		geneM31
Klf2	KLF2	0.338011	0.000401115	0.0071933	DGE	UpReg									geneM0
Klhl2	KLHL2	0.366157	0.0020928	0.0203987	DGE	UpReg										geneM1
Klhl23	KLHL23	0.311796	8.62959e-05	0.00281457	DGE	UpReg																																geneM3
Klhl24	KLHL24	0.568574	0.000292435	0.00594378	DGE	UpReg									geneM0
Klhl29	KLHL29	0.316992	0.000247349	0.00533159	DGE	UpReg																		geneM17
Klhl34	KLHL34	0.52574	0.00836808	0.0481856	DGE	UpReg									geneM0
Kpna2	KPNA2	0.301475	0.00290976	0.025059	DGE	UpReg																						geneM20
Krt1	KRT1	-0.526721	8.07425e-06	0.000670773	DGE	DownReg
L3mbtl1	L3MBTL1	0.314394	0.00307553	0.0258735	DGE	UpReg																	geneM16
Lamc1	LAMC1	0.304028	0.00582596	0.0384169	DGE	UpReg								SCZ.DGE_up																															geneM5
Lancl3	LANCL3	-0.43235	1.52106e-06	0.000238863	DGE	DownReg						BD.DGE_up		SCZ.DGE_up						geneM13
Ldlrad3	LDLRAD3	0.494762	7.52286e-05	0.00259325	DGE	UpReg					BD.DGE_down		SCZ.DGE_down		geneM0
Ldoc1	LDOC1	-0.461162	0.00477102	0.0341516	DGE	DownReg																																									geneM7
Lgals1	LGALS1	-0.494555	5.26433e-06	0.000544409	DGE	DownReg									geneM0
Lhfp	LHFPL6	0.339529	0.00132176	0.0153613	DGE	UpReg
Lig1	LIG1	-0.459847	0.000336871	0.00650228	DGE	DownReg									geneM0
Lipt2	LIPT2	-0.309361	0.00726016	0.0440597	DGE	DownReg																																						geneM4
Lpgat1	LPGAT1	0.400771	8.39543e-06	0.000684551	DGE	UpReg																					geneM2
Lrch2	LRCH2	0.36404	0.00163407	0.0174261	DGE	UpReg				ASD.DGE_up				SCZ.DGE_up																								geneM3
Lrfn5	LRFN5	0.353743	0.000124546	0.00364428	DGE	UpReg	ASD_SC	ASD								geneM1
Lrp1b	LRP1B	0.333128	0.00504814	0.0353203	DGE	UpReg									geneM0
Lrrc56	LRRC56	-0.402176	0.000143772	0.00394133	DGE	DownReg									geneM0
Lrrc8b	LRRC8B	0.42766	0.00148299	0.0164317	DGE	UpReg			ASD.DGE_down				SCZ.DGE_down			geneM1
Lrrk2	LRRK2	0.547797	4.44379e-07	0.000108702	DGE	UpReg										geneM1
Lrrtm1	LRRTM1	0.322616	0.00228214	0.0215668	DGE	UpReg									geneM0
Lrtm2	LRTM2	0.470624	0.000411741	0.00728637	DGE	UpReg																																										geneM8
Lsm4	LSM4	-0.403331	0.000427758	0.00750692	DGE	DownReg									geneM0
Ly6g6e	LY6G6E	-0.358299	0.00222229	0.0212378	DGE	DownReg
Lyar	LYAR	-0.340071	0.00717004	0.0436766	DGE	DownReg												geneM11
Macrod1	MACROD1	-0.478952	2.03731e-06	0.000297458	DGE	DownReg						BD.DGE_up		SCZ.DGE_up						geneM13
Mal2	MAL2	0.412748	0.00204834	0.0201352	DGE	UpReg										geneM1
Map4k3	MAP4K3	0.382227	0.00101881	0.0130814	DGE	UpReg									geneM0
Map4k5	MAP4K5	0.313735	0.000815301	0.0111994	DGE	UpReg																					geneM2
Map7	MAP7	0.380426	0.00285989	0.0248313	DGE	UpReg																					geneM2
Mapk1	MAPK1	0.404742	0.00292326	0.0250635	DGE	UpReg		ASD		ASD.DGE_up					geneM0
Mapk4	MAPK4	0.49595	0.0005252	0.00853753	DGE	UpReg																																geneM3
Mctp2	MCTP2	-0.486841	3.60111e-06	0.000428832	DGE	DownReg							SCZ.DGE_down														geneM2
Megf9	MEGF9	0.51183	0.00343007	0.0275445	DGE	UpReg																															geneM29
Mex3c	MEX3C	0.393506	0.00715178	0.0435892	DGE	UpReg																					geneM2
Mfsd2a	MFSD2A	0.517355	0.00240816	0.0223753	DGE	UpReg									geneM0
Mical2	MICAL2	0.31508	0.000714274	0.0103322	DGE	UpReg							SCZ.DGE_down			geneM1
Mn1	MN1	0.385558	1.93783e-05	0.00109552	DGE	UpReg																																geneM3
Morn2	MORN2	-0.522034	0.000343155	0.00655395	DGE	DownReg									geneM0
Mpnd	MPND	-0.314908	2.67486e-05	0.00135017	DGE	DownReg									geneM0
Mrpl14	MRPL14	-0.393846	0.00559404	0.0374506	DGE	DownReg									geneM0
Mrpl33	MRPL33	-0.372603	0.000437537	0.00753017	DGE	DownReg																																				geneM33
Mrpl34	MRPL34	-0.313359	0.00616173	0.0396127	DGE	DownReg									geneM0
Mrpl52	MRPL52	-0.412314	1.00719e-05	0.000745638	DGE	DownReg									geneM0
Mrpl57	MRPL57	-0.326455	0.00219914	0.0210958	DGE	DownReg
Mrps16	MRPS16	-0.441813	0.00165643	0.0175875	DGE	DownReg																																						geneM4
Mrps18c	MRPS18C	-0.453314	0.000197631	0.00469844	DGE	DownReg									geneM0
Mrps6	MRPS6	-0.306873	4.06099e-05	0.00177512	DGE	DownReg											geneM10
Mt3	MT3	-0.405323	0.000118856	0.00355728	DGE	DownReg								SCZ.DGE_up																								geneM3
Mtpn	MTPN	0.304686	2.43501e-05	0.00127462	DGE	UpReg									geneM0
Myadml2	MYADML2	-0.447211	0.0029623	0.0252212	DGE	DownReg							SCZ.DGE_down			geneM1
Myh2		0.643865	0.00743614	0.0447859	DGE	UpReg
Myo1b	MYO1B	0.445971	6.4016e-05	0.00238793	DGE	UpReg									geneM0
Naa40	NAA40	0.322727	0.0070706	0.0433019	DGE	UpReg																																										geneM8
Nagk	NAGK	-0.340464	0.000197008	0.00469844	DGE	DownReg									geneM0
Nap1l2	NAP1L2	0.35189	0.00398868	0.030254	DGE	UpReg			ASD.DGE_down							geneM1
Nckap5	NCKAP5	-0.33372	0.000137583	0.00386346	DGE	DownReg	ASD_SC	ASD																	geneM18
Ncoa2	NCOA2	0.319464	0.00110005	0.013678	DGE	UpReg																																									geneM7
Ndfip1	NDFIP1	0.679042	0.00829721	0.048	DGE	UpReg																																									geneM7
Ndst1	NDST1	0.512929	0.00293832	0.0251179	DGE	UpReg							SCZ.DGE_down														geneM2
Ndufa2	NDUFA2	-0.345253	4.27613e-06	0.000477126	DGE	DownReg																																				geneM33
Ndufa5	NDUFA5	-0.332416	0.0047673	0.0341516	DGE	DownReg	ASD_SC	ASD																																								geneM8
Ndufb4	NDUFB4	-0.36902	0.00604117	0.039246	DGE	DownReg																																				geneM33
Ndufb7	NDUFB7	-0.413939	0.00103026	0.0131049	DGE	DownReg																geneM15
Ndufs6	NDUFS6	-0.346534	0.00410659	0.0307813	DGE	DownReg									geneM0
Ndufs7	NDUFS7	-0.399172	0.00388425	0.029782	DGE	DownReg																					geneM2
Ndufv3	NDUFV3	-0.321248	0.0018073	0.0185463	DGE	DownReg										geneM1
Nefl	NEFL	0.311815	1.5518e-05	0.000944443	DGE	UpReg		ASD
Nelfe	NELFE	-0.311301	0.000323256	0.00635521	DGE	DownReg																																						geneM4
Nenf	NENF	-0.365705	7.02136e-05	0.00254449	DGE	DownReg																					geneM2
Net1	NET1	0.356883	0.000174124	0.00438954	DGE	UpReg			ASD.DGE_down																		geneM2
Neto1	NETO1	0.360152	9.68738e-05	0.00307433	DGE	UpReg							SCZ.DGE_down			geneM1
Neurod6	NEUROD6	0.308699	0.000207414	0.00481443	DGE	UpReg			ASD.DGE_down				SCZ.DGE_down																																			geneM8
Nfia	NFIA	-0.423421	8.52844e-05	0.00278873	DGE	DownReg	ASD_SC	ASD																														geneM3
Nfib	NFIB	-0.343062	4.55312e-05	0.00189888	DGE	DownReg																																geneM3
Nfix	NFIX	-0.323806	0.00148886	0.0164538	DGE	DownReg	ASD_SC	ASD																			geneM2
Nhlh1	NHLH1	0.684887	0.00410087	0.0307674	DGE	UpReg									geneM0
Nhsl2	NHSL2	0.355864	0.00772806	0.0457822	DGE	UpReg									geneM0
Ninj1	NINJ1	-0.37327	0.00113302	0.0139247	DGE	DownReg																																								geneM6
Nme6	NME6	-0.455127	0.000587612	0.00919363	DGE	DownReg																																geneM3
Noct	NOCT	0.311038	0.00760849	0.0453727	DGE	UpReg
Nod1	NOD1	-0.426062	0.00131106	0.0153419	DGE	DownReg																																							geneM5
Nod2	NOD2	-0.468142	1.22006e-05	0.000838874	DGE	DownReg																																							geneM5
Npas2	NPAS2	0.323606	0.000181476	0.00445631	DGE	UpReg	ASD_SC	ASD																																							geneM7
Npnt	NPNT	0.476307	0.000163326	0.00425001	DGE	UpReg																			geneM18
Nptxr	NPTXR	0.319718	0.000124568	0.00364428	DGE	UpReg									geneM0
Nr4a1	NR4A1	0.456309	0.0051218	0.0354689	DGE	UpReg							SCZ.DGE_down																geneM21
Nr4a3	NR4A3	0.398374	0.00832828	0.048067	DGE	UpReg							SCZ.DGE_down																geneM21
Nsg1	NSG1	0.347774	0.000163334	0.00425001	DGE	UpReg			ASD.DGE_down							geneM1
Nudt12	NUDT12	0.426215	0.00528322	0.0361693	DGE	UpReg									geneM0
Nxph3	NXPH3	-0.583666	0.000211224	0.00487617	DGE	DownReg			ASD.DGE_down				SCZ.DGE_down														geneM2
Opa1	OPA1	0.311734	0.00182004	0.0186101	DGE	UpReg			ASD.DGE_down							geneM1
Opcml	OPCML	0.353491	0.00612261	0.0395324	DGE	UpReg										geneM1
Osbpl1a	OSBPL1A	0.469568	0.000640068	0.00966071	DGE	UpReg							SCZ.DGE_down														geneM2
Ost4	OST4	-0.323923	5.48922e-05	0.00215503	DGE	DownReg																geneM15
Otud4	OTUD4	0.457685	0.000240715	0.00522439	DGE	UpReg											geneM10
Oxld1	OXLD1	-0.485397	0.000917273	0.0121665	DGE	DownReg																																						geneM4
Pabpc4	PABPC4	-0.300699	0.00255667	0.0233125	DGE	DownReg																																								geneM6
Pafah1b3	PAFAH1B3	-0.335572	3.73293e-06	0.000439656	DGE	DownReg						BD.DGE_up													geneM18
Pam	PAM	0.516057	0.0012194	0.0146052	DGE	UpReg																																											geneM9
Parp4	PARP4	-0.396976	0.000401513	0.0071933	DGE	DownReg																					geneM2
Pcdh10	PCDH10	0.343203	0.00852475	0.0487567	DGE	UpReg	ASD_SC	ASD																			geneM2
Pcdhb13	PCDHB6	0.530436	0.00472924	0.0339864	DGE	UpReg									geneM0
Pcdhga12	PCDHGA12	0.347487	0.000151999	0.00404482	DGE	UpReg								SCZ.DGE_up																								geneM3
Pcdhga4	PCDHGA4	0.301849	1.7284e-05	0.00101315	DGE	UpReg								SCZ.DGE_up																								geneM3
Pcdhga7	PCDHGA7	0.386816	0.00503352	0.0352568	DGE	UpReg									geneM0
Pcdhgc5	PCDHGC5	0.702437	0.00329682	0.0269316	DGE	UpReg										geneM1
Pcm1	PCM1	0.39089	0.00237322	0.0221479	DGE	UpReg												geneM11
Pcmtd2	PCMTD2	0.359361	0.00519808	0.0357858	DGE	UpReg									geneM0
Pcsk1n	PCSK1N	-0.359749	0.00718368	0.0437208	DGE	DownReg									geneM0
Pde7b	PDE7B	0.549701	0.00285608	0.0248152	DGE	UpReg									geneM0
Pdp2	PDP2	-0.331524	1.08293e-05	0.000791657	DGE	DownReg								SCZ.DGE_up	geneM0
Pdzrn3	PDZRN3	0.495941	2.51756e-06	0.000337088	DGE	UpReg								SCZ.DGE_up																								geneM3
Per2	PER2	0.364393	0.000498418	0.00825263	DGE	UpReg																							geneM21
Perp	PERP	0.304626	0.00116032	0.0141154	DGE	UpReg									geneM0
Pfdn1	PFDN1	-0.336448	0.00864225	0.0492021	DGE	DownReg			ASD.DGE_down				SCZ.DGE_down		geneM0
Pgam1	PGAM1	0.352706	0.00436663	0.0320875	DGE	UpReg																																											geneM9
Phactr2	PHACTR2	0.348739	0.00143494	0.0161471	DGE	UpReg									geneM0
Phf10	PHF10	0.336718	5.09163e-06	0.000530865	DGE	UpReg									geneM0
Phlpp2	PHLPP2	0.405563	0.00872869	0.0495241	DGE	UpReg										geneM1
Pik3r1	PIK3R1	0.306353	7.12135e-06	0.000620435	DGE	UpReg			ASD.DGE_down							geneM1
Pim1	PIM1	-0.301577	0.008729	0.0495241	DGE	DownReg						BD.DGE_up		SCZ.DGE_up																															geneM5
Pinx1	PINX1	-0.342834	2.39718e-06	0.000324738	DGE	DownReg		ASD							geneM0
Pkmyt1	PKMYT1	-0.393436	0.00160791	0.017314	DGE	DownReg									geneM0
Pkp2	PKP2	0.369237	0.000660103	0.00977801	DGE	UpReg																									geneM23
Plcb4	PLCB4	0.315175	0.00171495	0.0180581	DGE	UpReg										geneM1
Plk2	PLK2	0.386103	0.000433207	0.00751584	DGE	UpReg										geneM1
Plppr5	PLPPR5	0.366025	0.000134311	0.00380499	DGE	UpReg
Pmf1	PMF1	-0.329044	0.00540982	0.0367787	DGE	DownReg							SCZ.DGE_down																															geneM4
Pmvk	PMVK	-0.338913	6.03611e-05	0.00229878	DGE	DownReg									geneM0
Pnmal1	PNMA8A	0.319454	0.000235256	0.00516833	DGE	UpReg
Pnp	PNP	-0.543662	0.00429056	0.0317282	DGE	DownReg				ASD.DGE_up				SCZ.DGE_up																															geneM5
Polr2i	POLR2I	-0.365194	0.00201633	0.0199749	DGE	DownReg																geneM15
Pou3f3	POU3F3	0.345892	0.00365678	0.0288729	DGE	UpReg																																geneM3
Ppdpf	PPDPF	-0.365212	0.000113316	0.0034337	DGE	DownReg																																									geneM7
Ppp1r14b	PPP1R14B	-0.317243	0.00525774	0.0360234	DGE	DownReg				ASD.DGE_up																												geneM3
Ppp1r35	PPP1R35	-0.368173	4.54729e-06	0.000494372	DGE	DownReg									geneM0
Ppp3cb	PPP3CB	0.345282	0.00300195	0.0254735	DGE	UpReg			ASD.DGE_down																																						geneM7
Ppp3r1	PPP3R1	0.490716	0.000202309	0.00473046	DGE	UpReg																																									geneM7
Ppp4r1	PPP4R1	0.344228	0.00130055	0.015247	DGE	UpReg									geneM0
Ppp4r4	PPP4R4	0.460673	0.000302369	0.00604737	DGE	UpReg										geneM1
Pqlc3	SLC66A3	0.348096	0.00712423	0.043489	DGE	UpReg
Prkaa2	PRKAA2	0.404025	1.90027e-08	2.64076e-05	DGE	UpReg								SCZ.DGE_up		geneM1
Prkcdbp		-0.375285	0.00049369	0.00823723	DGE	DownReg
Prox2	PROX2	0.388465	0.00334392	0.027144	DGE	UpReg							SCZ.DGE_down			geneM1
Prrg2	PRRG2	-0.385202	0.0052949	0.0362149	DGE	DownReg									geneM0
Prrt4	PRRT4	-0.560535	0.000414112	0.00730584	DGE	DownReg									geneM0
Prss35	PRSS35	-0.300422	0.00343499	0.0275646	DGE	DownReg								SCZ.DGE_up																								geneM3
Psmb10	PSMB10	-0.602068	0.00576328	0.0381609	DGE	DownReg																					geneM2
Psme1	PSME1	-0.437717	0.00666205	0.0418476	DGE	DownReg																																							geneM5
Ptgfrn	PTGFRN	0.492919	0.00825407	0.0477887	DGE	UpReg									geneM0
Ptprk	PTPRK	0.327311	6.15559e-06	0.000567385	DGE	UpReg										geneM1
Pttg1	PTTG2	-0.458158	0.00144436	0.0162013	DGE	DownReg										geneM1
Pttg1	PTTG1	-0.458158	0.00144436	0.0162013	DGE	DownReg				ASD.DGE_up				SCZ.DGE_up	geneM0
Rab12	RAB12	0.329277	0.0021659	0.0208714	DGE	UpReg									geneM0
Rab13	RAB13	-0.43007	0.00365444	0.0288724	DGE	DownReg				ASD.DGE_up				SCZ.DGE_up																															geneM5
Rab37	RAB37	-0.386556	0.00726386	0.0440612	DGE	DownReg			ASD.DGE_down							geneM1
Rab3b	RAB3B	-0.415879	0.00281109	0.0245665	DGE	DownReg																	geneM16
Rad51ap1	RAD51AP1	-0.35313	0.00627302	0.0401185	DGE	DownReg																																						geneM4
Rad9a	RAD9A	-0.463087	0.00246452	0.0227429	DGE	DownReg																														geneM28
Rapgef4	RAPGEF4	0.478159	0.000215569	0.00489827	DGE	UpReg	ASD_SC	ASD								geneM1
Rarg	RARG	-0.393623	2.15394e-05	0.00116941	DGE	DownReg																																geneM3
Rarres2	RARRES2	-0.359941	0.000393774	0.00711273	DGE	DownReg																																geneM3
Rasa1	RASA1	0.329806	0.00781903	0.0461216	DGE	UpReg										geneM1
Rasal2	RASAL2	0.317441	2.27027e-07	7.36281e-05	DGE	UpReg										geneM1
Rasl11a	RASL11A	0.310887	0.0088454	0.0498951	DGE	UpReg					BD.DGE_down		SCZ.DGE_down														geneM2
Rassf7	RASSF7	-0.510112	0.00347484	0.0277116	DGE	DownReg																											geneM25
Rbbp5	RBBP5	0.371581	0.000196198	0.00469104	DGE	UpReg								SCZ.DGE_up	geneM0
Rbms3	RBMS3	-0.317043	0.00835957	0.0481705	DGE	DownReg		ASD																														geneM3
Rbmx2	RBMX2	-0.400826	7.42389e-05	0.00259325	DGE	DownReg								SCZ.DGE_up				geneM11
Rerg	RERG	0.495677	0.00181519	0.0185903	DGE	UpReg								SCZ.DGE_up																								geneM3
Resp18	RESP18	-0.474385	0.000890805	0.01194	DGE	DownReg									geneM0
Rfesd	RFESD	-0.315113	0.000835778	0.0114068	DGE	DownReg										geneM1
Rfx7	RFX7	0.310725	0.00372138	0.0291232	DGE	UpReg																																									geneM7
Rgs20	RGS20	0.375122	0.00170792	0.0180139	DGE	UpReg																																geneM3
Rhoc	RHOC	-0.408583	0.00146462	0.0163277	DGE	DownReg				ASD.DGE_up				SCZ.DGE_up																															geneM5
Rhog	RHOG	-0.414232	3.14927e-05	0.00148168	DGE	DownReg																					geneM2
Rhoj	RHOJ	0.580497	0.00529557	0.0362149	DGE	UpReg																																geneM3
Riiad1	RIIAD1	-0.377796	0.00236782	0.0221298	DGE	DownReg									geneM0
Rmnd5a	RMND5A	0.3217	0.0020292	0.0200399	DGE	UpReg									geneM0
Rnase4	RNASE4	0.366954	0.00160885	0.017314	DGE	UpReg								SCZ.DGE_up																																geneM6
Rnd2	RND2	-0.311532	0.000291752	0.00594378	DGE	DownReg									geneM0
Rnf103	RNF103	0.398231	3.16059e-05	0.00148168	DGE	UpReg																																						geneM4
Rnf11	RNF11	0.313375	0.000141863	0.0039258	DGE	UpReg																		geneM17
Rnf141	RNF141	0.342261	0.00201364	0.0199749	DGE	UpReg							SCZ.DGE_down																															geneM4
Rnf144a	RNF144A	0.4317	0.00117712	0.0142735	DGE	UpReg																					geneM2
Rnf223	RNF223	-0.457631	0.00447902	0.0325933	DGE	DownReg
Rnf38	RNF38	0.356639	2.11879e-05	0.00116168	DGE	UpReg																																									geneM7
RP23-106P7.2		-0.338099	0.000121095	0.00358478	DGE	DownReg
RP23-124N11.3		-0.403458	0.000626502	0.00956676	DGE	DownReg
RP23-149L10.1		0.502033	0.00554215	0.0372695	DGE	UpReg
RP23-155A10.1		-0.506426	4.04407e-06	0.000458661	DGE	DownReg
RP23-168M5.3		-0.307669	0.0018622	0.0189497	DGE	DownReg
RP23-183D11.6		-0.35595	0.000149916	0.00400824	DGE	DownReg
RP23-198N22.1		0.388076	0.00244409	0.0225937	DGE	UpReg
RP23-282C23.1		0.317845	5.6432e-05	0.00218181	DGE	UpReg
RP23-303F24.3		-1.08834	0.0069684	0.0429567	DGE	DownReg
RP23-304I1.3		1.39562	0.002316	0.0217896	DGE	UpReg
RP23-32L15.2		-0.331574	0.00108539	0.0135488	DGE	DownReg
RP23-341C5.3		-0.40517	0.00104798	0.0132509	DGE	DownReg
RP23-353K7.9		-0.393957	0.00254591	0.023231	DGE	DownReg
RP23-356J2.10		-0.38219	6.57897e-05	0.00243978	DGE	DownReg
RP23-387F9.3		-0.447088	7.56954e-05	0.00259527	DGE	DownReg
RP23-47P18.9		-0.361013	1.20323e-05	0.000831798	DGE	DownReg
RP23-83N17.1		0.384065	0.00100495	0.0129382	DGE	UpReg
RP24-468O24.4		-0.360779	0.00566982	0.0377592	DGE	DownReg
Rpl18	RPL18	-0.364403	1.39418e-06	0.000233343	DGE	DownReg																geneM15
Rpl22l1	RPL22L1	-0.324857	1.95817e-05	0.00110212	DGE	DownReg																																							geneM5
Rpl23	RPL23	-0.33322	0.000166664	0.00430015	DGE	DownReg																geneM15
Rpl26	RPL26	-0.378477	1.60425e-06	0.000243779	DGE	DownReg																geneM15
Rpl27		-0.360899	2.15267e-06	0.0003009	DGE	DownReg
Rpl28	RPL28	-0.343706	9.33784e-05	0.00299943	DGE	DownReg				ASD.DGE_up												geneM15
Rpl32	RPL32	-0.346411	0.000707049	0.010255	DGE	DownReg																geneM15
Rpl34	RPL34	-0.383156	3.95571e-05	0.00175319	DGE	DownReg																geneM15
Rpl35	RPL35	-0.362126	1.55065e-05	0.000944443	DGE	DownReg						BD.DGE_up		SCZ.DGE_up								geneM15
Rpl35a	RPL35A	-0.400554	8.60381e-07	0.000179411	DGE	DownReg																geneM15
Rpl36	RPL36	-0.335168	0.00016802	0.00430742	DGE	DownReg				ASD.DGE_up												geneM15
Rpl37	RPL37	-0.414096	1.61864e-05	0.000975788	DGE	DownReg																geneM15
Rpl37a		-0.314477	5.79495e-05	0.00222023	DGE	DownReg
Rpl38	RPL38	-0.424667	0.00168301	0.0178102	DGE	DownReg																geneM15
Rpl41		-0.413003	0.000367741	0.00686352	DGE	DownReg
Rpl8	RPL8	-0.31784	2.07579e-06	0.000297458	DGE	DownReg																geneM15
Rps14	RPS14	-0.349022	0.000288061	0.00590991	DGE	DownReg																geneM15
Rps15	RPS15	-0.32952	0.000821838	0.0112527	DGE	DownReg																geneM15
Rps16	RPS16	-0.358308	1.056e-06	0.000202984	DGE	DownReg																																									geneM7
Rps18	RPS18	-0.302676	8.39389e-05	0.00277325	DGE	DownReg																geneM15
Rps20		-0.419675	5.12153e-05	0.00204861	DGE	DownReg
Rps21	RPS21	-0.357907	2.69616e-06	0.000357241	DGE	DownReg																geneM15
Rps27		-0.376819	7.50682e-05	0.00259325	DGE	DownReg
Rps5	RPS5	-0.407252	8.86441e-07	0.000181863	DGE	DownReg																geneM15
Rps6ka3	RPS6KA3	0.314223	0.00441255	0.0322944	DGE	UpReg	ASD_SC	ASD					SCZ.DGE_down			geneM1
Rpsa		-0.322827	0.000142588	0.0039258	DGE	DownReg
Rragc	RRAGC	0.33209	0.00597434	0.0389534	DGE	UpReg									geneM0
Rragd	RRAGD	0.325568	4.26682e-08	2.85966e-05	DGE	UpReg				ASD.DGE_up																												geneM3
Rrm2b	RRM2B	0.430257	0.00697086	0.0429567	DGE	UpReg									geneM0
Rsph9	RSPH9	-0.351816	1.47867e-05	0.00093322	DGE	DownReg								SCZ.DGE_up	geneM0
Rspo3	RSPO3	-0.588884	0.00520999	0.0358415	DGE	DownReg									geneM0
S100a11	S100A11	-0.332031	0.00860255	0.0490595	DGE	DownReg																																								geneM6
S100a13	S100A13	-0.365878	0.00111602	0.0137689	DGE	DownReg																																geneM3
S100a16	S100A16	-0.393378	1.6764e-05	0.00100112	DGE	DownReg				ASD.DGE_up																												geneM3
Sacs	SACS	0.306969	0.0022566	0.021485	DGE	UpReg										geneM1
Saxo2	SAXO2	-0.347342	0.00575311	0.0381488	DGE	DownReg
Saysd1	SAYSD1	-0.305577	1.00825e-05	0.000745638	DGE	DownReg									geneM0
Schip1	IQCJ-SCHIP1	0.742388	0.00390823	0.0298574	DGE	UpReg																					geneM2
Schip1	SCHIP1	0.742388	0.00390823	0.0298574	DGE	UpReg			ASD.DGE_down																		geneM2
Scn3b	SCN3B	0.458166	0.0013914	0.0158732	DGE	UpReg																	geneM16
Scnm1	SCNM1	-0.366837	0.000124769	0.00364428	DGE	DownReg									geneM0
Scrg1	SCRG1	-0.353197	0.000668483	0.00987584	DGE	DownReg																																geneM3
Scube1	SCUBE1	0.616411	0.00178359	0.0184239	DGE	UpReg							SCZ.DGE_down														geneM2
Selm		-0.383381	1.21294e-06	0.000214286	DGE	DownReg
Sema3e	SEMA3E	0.361868	0.00288539	0.0249675	DGE	UpReg																					geneM2
Senp7	SENP7	0.370363	0.000745969	0.0105783	DGE	UpReg									geneM0
Sepw1		-0.407458	0.00676276	0.0422299	DGE	DownReg
Setbp1	SETBP1	0.409164	9.60619e-08	4.69964e-05	DGE	UpReg	ASD_SC	ASD					SCZ.DGE_down		geneM0
Setx	SETX	0.343042	0.000336311	0.00650132	DGE	UpReg																					geneM2
Sgip1	SGIP1	0.378395	0.00652469	0.0412086	DGE	UpReg			ASD.DGE_down																																						geneM7
Shank2	SHANK2	0.4249	2.35024e-06	0.000324738	DGE	UpReg	ASD_SC	ASD																geneM17
Sla2	SLA2	-0.314058	0.00347409	0.0277116	DGE	DownReg									geneM0
Slc12a7	SLC12A7	-0.375006	0.00013759	0.00386346	DGE	DownReg																																geneM3
Slc17a6	SLC17A6	-0.347746	0.00436433	0.0320875	DGE	DownReg										geneM1
Slc25a28	SLC25A28	-0.361185	0.000782718	0.010893	DGE	DownReg								SCZ.DGE_up	geneM0
Slc2a1	SLC2A1	0.39374	0.00786483	0.0462041	DGE	UpReg								SCZ.DGE_up																															geneM5
Slc39a10	SLC39A10	0.490832	2.85408e-05	0.00140713	DGE	UpReg							SCZ.DGE_down			geneM1
Slk	SLK	0.302028	0.00572423	0.0380419	DGE	UpReg									geneM0
Slmap	SLMAP	0.404964	0.000387323	0.00704596	DGE	UpReg									geneM0
Smco3	SMCO3	0.64482	0.0047281	0.0339864	DGE	UpReg
Smcr8	SMCR8	0.356754	0.00161642	0.0173509	DGE	UpReg									geneM0
Smdt1	SMDT1	-0.370874	0.00112543	0.0138581	DGE	DownReg																																									geneM7
Smurf2	SMURF2	0.321639	0.00063986	0.00966071	DGE	UpReg																																geneM3
Snrnp27	SNRNP27	-0.343954	0.00178096	0.0184239	DGE	DownReg																																									geneM7
Snx13	SNX13	0.4425	0.00172998	0.0181562	DGE	UpReg																																					geneM34
Snx4	SNX4	0.314692	0.00483999	0.0344113	DGE	UpReg							SCZ.DGE_down																															geneM4
Sorbs2	SORBS2	0.4223	0.000239585	0.00522439	DGE	UpReg										geneM1
Sorcs1	SORCS1	0.307913	0.00558046	0.0373794	DGE	UpReg										geneM1
Spag6l	SPAG6	0.4024	0.00258501	0.0234699	DGE	UpReg			ASD.DGE_down							geneM1
Spata13	SPATA13	-0.327168	0.000371387	0.00689641	DGE	DownReg																																							geneM5
Spata3	SPATA3	-0.849768	1.39485e-05	0.000914562	DGE	DownReg
Spats2l	SPATS2L	0.354604	0.00232764	0.0218345	DGE	UpReg				ASD.DGE_up					geneM0
Spcs3		0.421305	0.00125846	0.0149166	DGE	UpReg
Spice1	SPICE1	0.333666	0.00330804	0.0269387	DGE	UpReg								SCZ.DGE_up	geneM0
Spock3	SPOCK3	0.348091	0.00126937	0.0150019	DGE	UpReg							SCZ.DGE_down														geneM2
Spsb4	SPSB4	-0.340585	0.000132064	0.00376552	DGE	DownReg							SCZ.DGE_down		geneM0
Sst	SST	-0.423431	0.000880049	0.0118604	DGE	DownReg							SCZ.DGE_down																		geneM23
St6gal2	ST6GAL2	0.530409	2.1096e-07	7.25246e-05	DGE	UpReg					BD.DGE_down		SCZ.DGE_down		geneM0
Stk26	STK26	0.462915	0.00140899	0.016002	DGE	UpReg
Stxbp6	STXBP6	0.398353	6.42489e-08	3.89165e-05	DGE	UpReg									geneM0
Svbp	SVBP	-0.317507	0.00387653	0.0297762	DGE	DownReg
Syce2	SYCE2	-0.328759	0.00370957	0.0290798	DGE	DownReg									geneM0
Syngap1	SYNGAP1	0.411012	0.00270203	0.0240348	DGE	UpReg	ASD_SC	ASD																geneM17
Sytl2	SYTL2	0.633249	0.00140407	0.0159748	DGE	UpReg										geneM1
Taf13	TAF13	0.323111	0.000634133	0.00961951	DGE	UpReg									geneM0
Taf9b	TAF9B	0.368076	0.00835424	0.0481705	DGE	UpReg																					geneM2
Tbca	TBCA	-0.375314	2.52733e-05	0.00130682	DGE	DownReg									geneM0
Tbr1	TBR1	0.351305	0.000340753	0.00654286	DGE	UpReg	ASD_SC	ASD								geneM1
Tcaf1	TCAF1	0.346569	0.00293791	0.0251179	DGE	UpReg
Tcap	TCAP	0.459446	0.00765413	0.0454319	DGE	UpReg									geneM0
Tec	TEC	0.385191	0.00031249	0.00620105	DGE	UpReg								SCZ.DGE_up	geneM0
Tfdp1	TFDP1	0.516968	0.00611762	0.0395207	DGE	UpReg																																geneM3
Tfdp2	TFDP2	0.436986	2.31535e-07	7.36281e-05	DGE	UpReg									geneM0
Tfr2	TFR2	0.305351	0.00594294	0.0388907	DGE	UpReg									geneM0
Thrb	THRB	0.563443	5.43472e-05	0.00214553	DGE	UpReg										geneM1
Tie1	TIE1	0.475189	0.0031168	0.0260323	DGE	UpReg			ASD.DGE_down				SCZ.DGE_down		geneM0
Tlk1	TLK1	0.519298	3.6893e-05	0.00165823	DGE	UpReg								SCZ.DGE_up																																	geneM7
Tln1	TLN1	-0.311021	2.25628e-08	2.64076e-05	DGE	DownReg				ASD.DGE_up																																				geneM6
Tm9sf3	TM9SF3	0.317273	0.00543658	0.0369014	DGE	UpReg									geneM0
Tmeff1	TMEFF1	0.598426	0.00581257	0.0383485	DGE	UpReg																					geneM2
Tmem106b	TMEM106B	0.392785	0.00384426	0.0296357	DGE	UpReg																					geneM2
Tmem141	TMEM141	-0.335756	4.03412e-05	0.00176945	DGE	DownReg									geneM0
Tmem167b	TMEM167B	0.342889	0.00210786	0.0204985	DGE	UpReg				ASD.DGE_up		BD.DGE_up		SCZ.DGE_up																															geneM5
Tmem176a	TMEM176A	-0.316861	0.000399639	0.00717995	DGE	DownReg				ASD.DGE_up				SCZ.DGE_up																								geneM3
Tmem178b	TMEM178B	0.327038	4.94069e-07	0.000116381	DGE	UpReg																																										geneM8
Tmem196		0.626585	0.00131492	0.0153447	DGE	UpReg
Tmem200b	TMEM200B	0.381646	7.9243e-05	0.00267366	DGE	UpReg							SCZ.DGE_down			geneM1
Tmem205	TMEM205	-0.349539	0.000535623	0.00863513	DGE	DownReg									geneM0
Tmem219	TMEM219	-0.341403	0.00119333	0.0143878	DGE	DownReg																																						geneM4
Tmem256	TMEM256-PLSCR3	-0.4277	0.00265939	0.0237856	DGE	DownReg									geneM0
Tmem256	TMEM256	-0.4277	0.00265939	0.0237856	DGE	DownReg																					geneM2
Tmem91	TMEM91	-0.339952	4.78738e-05	0.00197707	DGE	DownReg									geneM0
Tollip	TOLLIP	0.326557	0.000457404	0.00777831	DGE	UpReg										geneM1
Tomm20	TOMM20	0.352839	0.000131533	0.00376552	DGE	UpReg		ASD								geneM1
Tomm70a	TOMM70	0.366349	1.25534e-05	0.000856837	DGE	UpReg
Tpm3-rs7		-0.317847	0.000733339	0.0104692	DGE	DownReg
Tppp	TPPP	0.377467	0.00086667	0.0117372	DGE	UpReg							SCZ.DGE_down														geneM2
Trappc6a	TRAPPC6A	-0.346065	0.00482794	0.0344042	DGE	DownReg																																						geneM4
Trim33	TRIM33	0.365816	0.000696605	0.0101732	DGE	UpReg		ASD																																				geneM4
Trmt10c	TRMT10C	0.352461	0.00812629	0.0471947	DGE	UpReg									geneM0
Trmt112	TRMT112	-0.315607	1.41053e-05	0.000915406	DGE	DownReg								SCZ.DGE_up	geneM0
Trp53inp1	TP53INP1	0.544364	0.00190209	0.0192121	DGE	UpReg																																geneM3
Tsen54	TSEN54	-0.375239	0.000106368	0.00330211	DGE	DownReg									geneM0
Tshz2	TSHZ2	-0.302863	0.00416674	0.031031	DGE	DownReg										geneM1
Tspan2	TSPAN2	0.401741	0.0079232	0.0464224	DGE	UpReg								SCZ.DGE_up											geneM18
Tst	TST	-0.35846	4.49632e-08	2.85966e-05	DGE	DownReg																																geneM3
Twsg1	TWSG1	0.571566	0.00493166	0.0348046	DGE	UpReg																																geneM3
Txlng	TXLNG	0.310143	0.000986966	0.0127951	DGE	UpReg								SCZ.DGE_up	geneM0
Txndc17	TXNDC17	-0.340964	0.0015736	0.0170641	DGE	DownReg							SCZ.DGE_down		geneM0
Uba52	UBA52	-0.388693	1.10814e-05	0.000800886	DGE	DownReg																geneM15
Ubc	UBC	-0.439722	0.00305874	0.0258299	DGE	DownReg									geneM0
Ube2e2	UBE2E2	0.32206	1.47926e-06	0.000237505	DGE	UpReg																																									geneM7
Ube2g1	UBE2G1	0.315832	2.74065e-05	0.0013671	DGE	UpReg							SCZ.DGE_down		geneM0
Ubxn11	UBXN11	-0.503652	0.00788142	0.0462117	DGE	DownReg						BD.DGE_up		SCZ.DGE_up		geneM1
Ugcg	UGCG	0.360527	5.89767e-06	0.000559497	DGE	UpReg								SCZ.DGE_up														geneM20
Unc80	UNC80	0.326047	6.72708e-05	0.00245529	DGE	UpReg										geneM1
Uqcc2	UQCC2	-0.440204	0.000147135	0.00399489	DGE	DownReg																										geneM24
Uqcc3	UQCC3	-0.319253	0.00606013	0.039329	DGE	DownReg								SCZ.DGE_up
Usf3	USF3	0.374557	0.00027073	0.00565972	DGE	UpReg
Usp32	USP32	0.425857	2.86657e-10	3.64627e-06	DGE	UpReg			ASD.DGE_down				SCZ.DGE_down														geneM2
Usp32	USP6	0.425857	2.86657e-10	3.64627e-06	DGE	UpReg									geneM0
Usp33	USP33	0.376131	0.00300124	0.0254735	DGE	UpReg			ASD.DGE_down				SCZ.DGE_down			geneM1
Vamp8	VAMP8	-0.520104	1.11844e-06	0.000206181	DGE	DownReg																																								geneM6
Vip	VIP	0.326887	0.00167573	0.0177724	DGE	UpReg		ASD																							geneM23
Vipr1	VIPR1	0.447463	0.00198083	0.0197308	DGE	UpReg										geneM1
Vsig10l	VSIG10L	-0.485931	0.000271699	0.00566559	DGE	DownReg									geneM0
Vstm2a	VSTM2A	0.359232	0.00742864	0.0447619	DGE	UpReg										geneM1
Vwa5b1	VWA5B1	0.496486	0.00587778	0.0386984	DGE	UpReg
Wasf1	WASF1	0.329063	0.000902721	0.0120616	DGE	UpReg																																									geneM7
Yipf4	YIPF4	0.438067	0.00657526	0.0414411	DGE	UpReg					BD.DGE_down		SCZ.DGE_down		geneM0
Ypel2	YPEL2	0.463487	0.00764543	0.0454015	DGE	UpReg																					geneM2
Ythdc2	YTHDC2	0.499676	0.00799624	0.0467642	DGE	UpReg		ASD								geneM1
Ythdf3	YTHDF3	0.353537	0.00509195	0.0354041	DGE	UpReg									geneM0
Zbtb18	ZBTB18	0.35351	0.000910836	0.0121308	DGE	UpReg									geneM0
Zbtb20	ZBTB20	-0.381605	3.4112e-07	9.17745e-05	DGE	DownReg	ASD_SC	ASD																														geneM3
Zbtb41	ZBTB41	0.390433	0.00691371	0.0427528	DGE	UpReg																																					geneM34
Zdhhc14	ZDHHC14	0.361644	0.00283772	0.024733	DGE	UpReg																					geneM2
Zfand2a	ZFAND2A	0.342035	0.00134425	0.0155727	DGE	UpReg											geneM10
Zfhx3	ZFHX3	-0.449077	0.00247909	0.0228012	DGE	DownReg																																								geneM6
Zfp131	ZNF131	0.30344	0.002723	0.0241591	DGE	UpReg																						geneM20
Zfp251	ZNF251	0.382167	6.78025e-06	0.00060357	DGE	UpReg																																										geneM8
Zfp580	ZNF580	-0.346651	0.000749134	0.0105995	DGE	DownReg									geneM0
Zfp618	ZNF618	-0.414859	7.39438e-05	0.00259325	DGE	DownReg									geneM0
Zfp933		0.356013	0.00370051	0.029076	DGE	UpReg
Znhit1	ZNHIT1	-0.380367	0.00344125	0.0275646	DGE	DownReg									geneM0
Zswim3	ZSWIM3	0.306203	0.0049636	0.0348631	DGE	UpReg																										geneM24
March1		0.193238	0.115739	0.248522	NOT_DGE	UpReg
March2		-0.168225	4.43374e-07	0.000108702	NOT_DGE	DownReg
Marc2		0.0916846	0.0330103	0.112541	NOT_DGE	UpReg
March4		0.297141	0.0057838	0.038229	NOT_DGE	UpReg
March5		-0.0301823	0.584565	0.719186	NOT_DGE	DownReg
March6		0.442584	0.00893844	0.0501531	NOT_DGE	UpReg
March7		0.138659	0.286135	0.450728	NOT_DGE	UpReg
March8		0.11511	0.0694616	0.179401	NOT_DGE	UpReg
March9		0.0732736	0.293454	0.45847	NOT_DGE	UpReg
March11		-0.144585	0.0978931	0.222357	NOT_DGE	DownReg
Sept3		-0.0372973	0.194314	0.349847	NOT_DGE	DownReg
Sept4		-0.0774845	0.548396	0.691337	NOT_DGE	DownReg
Sept5		0.254012	4.87104e-05	0.00198589	NOT_DGE	UpReg
Sept6		0.227074	0.0224252	0.0874995	NOT_DGE	UpReg
Sept7		0.0898967	0.193083	0.34837	NOT_DGE	UpReg
Sept8		-0.0119056	0.744368	0.836536	NOT_DGE	DownReg
Sept9		0.19466	0.0218198	0.0861526	NOT_DGE	UpReg
Sept10		0.141637	0.322859	0.48806	NOT_DGE	UpReg
Sept11		0.143004	0.0129566	0.0629518	NOT_DGE	UpReg
Sep15		0.0358618	0.359842	0.524731	NOT_DGE	UpReg
0610009O20Rik		-0.121626	0.0287207	0.102533	NOT_DGE	DownReg
1810049J17Rik		0.854606	0.0213521	0.0849541	NOT_DGE	UpReg
1810055G02Rik	C11orf24	0.0884162	0.175403	0.326203	NOT_DGE	UpReg							SCZ.DGE_down														geneM2
2310039H08Rik	C6orf226	-0.130034	0.141162	0.282735	NOT_DGE	DownReg																																						geneM4
2510009E07Rik	C3orf70	0.125806	0.273787	0.43707	NOT_DGE	UpReg								SCZ.DGE_up																								geneM3
2610318N02Rik		0.0137098	0.911883	0.945789	NOT_DGE	UpReg
2700062C07Rik	C18orf21	0.0149121	0.843849	0.904128	NOT_DGE	UpReg									geneM0
2810403A07Rik		0.173738	0.215578	0.37456	NOT_DGE	UpReg
2900055J20Rik		-0.118151	0.674502	0.788463	NOT_DGE	DownReg
3110021N24Rik		0.0838826	0.0521451	0.149827	NOT_DGE	UpReg
3110070M22Rik		-0.217355	0.168616	0.318314	NOT_DGE	DownReg
3110082I17Rik	C7orf50	0.0619559	0.512481	0.660383	NOT_DGE	UpReg									geneM0
4930507D05Rik		0.0563727	0.479492	0.632494	NOT_DGE	UpReg
4930518I15Rik		0.147538	0.0005165	0.00843169	NOT_DGE	UpReg
4930535I16Rik		0.179406	0.0902397	0.211286	NOT_DGE	UpReg
5930422O12Rik		-0.259029	0.0195613	0.0804983	NOT_DGE	DownReg
8030462N17Rik	C18orf25	0.133559	0.209645	0.367438	NOT_DGE	UpReg											geneM10
9030612E09Rik		0.202415	0.0243758	0.0920879	NOT_DGE	UpReg
9130011E15Rik		0.429847	0.00921806	0.0510474	NOT_DGE	UpReg
9130213A22Rik		-0.164319	0.239219	0.401142	NOT_DGE	DownReg
9930104L06Rik	C1orf109	0.097513	0.366096	0.530478	NOT_DGE	UpReg									geneM0
A2m	A2M	0.211042	0.183948	0.336962	NOT_DGE	UpReg																												geneM26
A530084C06Rik		0.35193	0.0155142	0.0700286	NOT_DGE	UpReg
A730071L15Rik		-0.0452605	0.847519	0.905657	NOT_DGE	DownReg
Aaas	AAAS	-0.158747	0.00138026	0.0157902	NOT_DGE	DownReg																											geneM25
Aacs	AACS	0.240222	7.99494e-07	0.000169493	NOT_DGE	UpReg										geneM1
Aaed1		0.0103912	0.89753	0.936533	NOT_DGE	UpReg
Aagab	AAGAB	0.222177	0.00687204	0.0425571	NOT_DGE	UpReg																																											geneM9
Aak1	AAK1	0.199427	0.0143339	0.0665673	NOT_DGE	UpReg										geneM1
Aamdc	AAMDC	-0.231098	0.00138164	0.0157902	NOT_DGE	DownReg																					geneM2
Aamp	AAMP	0.016609	0.75593	0.843829	NOT_DGE	UpReg								SCZ.DGE_up																																			geneM9
Aar2	AAR2	0.0812607	0.229751	0.390647	NOT_DGE	UpReg																					geneM2
Aars	AARS1	-0.0854331	0.0695245	0.179457	NOT_DGE	DownReg
Aars2	AARS2	-0.0280607	0.64155	0.764666	NOT_DGE	DownReg																								geneM22
Aarsd1	AARSD1	0.20624	0.165293	0.3139	NOT_DGE	UpReg																																											geneM9
Aarsd1	PTGES3L-AARSD1	0.20624	0.165293	0.3139	NOT_DGE	UpReg										geneM1
Aasdh	AASDH	-0.121696	0.211052	0.369039	NOT_DGE	DownReg																																geneM3
Aasdhppt	AASDHPPT	0.160628	0.0687542	0.178407	NOT_DGE	UpReg			ASD.DGE_down														geneM16
Aass	AASS	0.10798	0.124833	0.260435	NOT_DGE	UpReg																																geneM3
Aatf	AATF	-0.195315	0.125048	0.260799	NOT_DGE	DownReg												geneM11
Aatk	AATK	0.215125	0.0149892	0.0685062	NOT_DGE	UpReg			ASD.DGE_down																		geneM2
Abat	ABAT	0.145909	0.336279	0.501756	NOT_DGE	UpReg	ASD_SC	ASD																														geneM3
Abca1	ABCA1	0.21597	0.229089	0.390044	NOT_DGE	UpReg				ASD.DGE_up																												geneM3
Abca2	ABCA2	0.0309472	0.555532	0.69743	NOT_DGE	UpReg																					geneM2
Abca3	ABCA3	-0.00180076	0.937195	0.960468	NOT_DGE	DownReg									geneM0
Abca5	ABCA5	0.260489	1.36557e-06	0.000233343	NOT_DGE	UpReg																																										geneM8
Abca6	ABCA6	-0.0440054	0.573001	0.710942	NOT_DGE	DownReg										geneM1
Abca7	ABCA7	0.0127114	0.764903	0.851007	NOT_DGE	UpReg		ASD																									geneM25
Abca8a		0.0167113	0.916854	0.949087	NOT_DGE	UpReg
Abca8b	ABCA8	0.274494	0.104942	0.23296	NOT_DGE	UpReg					BD.DGE_down																geneM2
Abcb10	ABCB10	-0.111576	0.33113	0.496312	NOT_DGE	DownReg									geneM0
Abcb1a	ABCB1	0.278975	0.008089	0.0470902	NOT_DGE	UpReg			ASD.DGE_down		BD.DGE_down		SCZ.DGE_down																					geneM26
Abcb1b	ABCB1	0.0214962	0.809898	0.882144	NOT_DGE	UpReg			ASD.DGE_down		BD.DGE_down		SCZ.DGE_down																					geneM26
Abcb4	ABCB4	-0.139883	0.535927	0.68061	NOT_DGE	DownReg																																								geneM6
Abcb6	ABCB6	-0.0231988	0.728496	0.825667	NOT_DGE	DownReg								SCZ.DGE_up																		geneM24
Abcb7	ABCB7	0.142283	0.1322	0.270613	NOT_DGE	UpReg								SCZ.DGE_up	geneM0
Abcb8	ABCB8	-0.150685	0.0335654	0.113549	NOT_DGE	DownReg							SCZ.DGE_down		geneM0
Abcb9	ABCB9	-0.0558627	0.575422	0.712879	NOT_DGE	DownReg			ASD.DGE_down																																							geneM8
Abcc1	ABCC1	0.108506	3.33331e-05	0.00153374	NOT_DGE	UpReg										geneM1
Abcc10	ABCC10	-0.165566	0.101121	0.227456	NOT_DGE	DownReg							SCZ.DGE_down								geneM14
Abcc3	ABCC3	0.149701	0.0182912	0.0775931	NOT_DGE	UpReg							SCZ.DGE_down		geneM0
Abcc4	ABCC4	-0.0531174	0.684364	0.794915	NOT_DGE	DownReg																																								geneM6
Abcc5	ABCC5	0.0453655	0.366122	0.530478	NOT_DGE	UpReg										geneM1
Abcc8	ABCC8	0.189072	0.245315	0.407655	NOT_DGE	UpReg																																										geneM8
Abcc9	ABCC9	0.367809	0.118141	0.251422	NOT_DGE	UpReg								SCZ.DGE_up																								geneM3
Abcd1	ABCD1	-0.163003	0.0660562	0.173782	NOT_DGE	DownReg																																geneM3
Abcd2	ABCD2	0.461554	0.0224783	0.0876124	NOT_DGE	UpReg																																geneM3
Abcd3	ABCD3	-0.0355128	0.770426	0.855058	NOT_DGE	DownReg																																geneM3
Abcd4	ABCD4	0.0333422	0.575941	0.713059	NOT_DGE	UpReg								SCZ.DGE_up			geneM10
Abce1	ABCE1	0.119964	0.126754	0.262934	NOT_DGE	UpReg									geneM0
Abcf1	ABCF1	-0.0662598	0.184044	0.337083	NOT_DGE	DownReg																				geneM19
Abcf2	ABCF2	0.0417941	0.340956	0.506655	NOT_DGE	UpReg																																											geneM9
Abcf2	ABCF2-H2BE1	0.0417941	0.340956	0.506655	NOT_DGE	UpReg
Abcf3	ABCF3	-0.0299149	0.368431	0.532611	NOT_DGE	DownReg																																											geneM9
Abcg1	ABCG1	0.059482	0.440695	0.598829	NOT_DGE	UpReg																					geneM2
Abcg2		0.215167	0.0486823	0.143557	NOT_DGE	UpReg
Abcg4	ABCG4	-0.0232099	0.561899	0.702226	NOT_DGE	DownReg			ASD.DGE_down							geneM1
Abhd10	ABHD10	-0.0431823	0.486584	0.638406	NOT_DGE	DownReg									geneM0
Abhd11	ABHD11	-0.215279	0.0361673	0.118845	NOT_DGE	DownReg																																						geneM4
Abhd12	ABHD12	-0.048344	0.258762	0.421825	NOT_DGE	DownReg																					geneM2
Abhd14a	ABHD14A	-0.237769	0.00757407	0.0453127	NOT_DGE	DownReg									geneM0
Abhd14b	ABHD14B	-0.201742	0.0146749	0.0676628	NOT_DGE	DownReg									geneM0
Abhd15	ABHD15	0.298678	0.141234	0.282754	NOT_DGE	UpReg								SCZ.DGE_up																								geneM3
Abhd16a	ABHD16A	-0.139894	0.000452514	0.00770545	NOT_DGE	DownReg																											geneM25
Abhd17a	ABHD17A	-0.021078	0.655338	0.774511	NOT_DGE	DownReg									geneM0
Abhd17b	ABHD17B	0.0403742	0.379728	0.542347	NOT_DGE	UpReg							SCZ.DGE_down														geneM2
Abhd17c	ABHD17C	0.248628	0.0243626	0.0920654	NOT_DGE	UpReg																																geneM3
Abhd3	ABHD3	0.0272046	0.869323	0.918497	NOT_DGE	UpReg				ASD.DGE_up																												geneM3
Abhd4	ABHD4	0.0159899	0.916665	0.949067	NOT_DGE	UpReg				ASD.DGE_up				SCZ.DGE_up																								geneM3
Abhd5	ABHD5	0.233713	0.000265527	0.00558958	NOT_DGE	UpReg																																geneM3
Abhd6	ABHD6	0.121882	0.12834	0.265142	NOT_DGE	UpReg							SCZ.DGE_down														geneM2
Abhd8	ABHD8	-0.118723	0.0963997	0.220026	NOT_DGE	DownReg										geneM1
Abi1	ABI1	0.247325	0.0472431	0.141097	NOT_DGE	UpReg								SCZ.DGE_up																								geneM3
Abi2	ABI2	0.114388	0.0197546	0.0810837	NOT_DGE	UpReg																																									geneM7
Abi3	ABI3	-0.1448	0.00173852	0.0182158	NOT_DGE	DownReg																																								geneM6
Abi3bp	ABI3BP	0.516435	0.0143228	0.0665399	NOT_DGE	UpReg									geneM0
Abl1	ABL1	0.281295	0.0905321	0.211841	NOT_DGE	UpReg																					geneM2
Abl2	ABL2	-0.00747557	0.936983	0.960468	NOT_DGE	DownReg								SCZ.DGE_up																							geneM29
Ablim1	ABLIM1	0.114089	0.0816746	0.198795	NOT_DGE	UpReg																																geneM3
Ablim2	ABLIM2	0.217395	0.110294	0.241014	NOT_DGE	UpReg										geneM1
Ablim3	ABLIM3	0.140782	0.0231793	0.0891325	NOT_DGE	UpReg									geneM0
Abr	ABR	0.209644	0.00264438	0.0237211	NOT_DGE	UpReg										geneM1
Abracl	ABRACL	-0.0781597	0.454727	0.611686	NOT_DGE	DownReg																								geneM22
Abt1	ABT1	-0.15335	0.0787739	0.19427	NOT_DGE	DownReg									geneM0
Abtb1	ABTB1	-0.153159	0.0903801	0.211524	NOT_DGE	DownReg										geneM1
Abtb2	ABTB2	-0.0383176	0.812166	0.883046	NOT_DGE	DownReg							SCZ.DGE_down														geneM2
AC074312.5		-0.00723243	0.883513	0.927807	NOT_DGE	DownReg
AC090443.3		0.0591997	0.741645	0.834621	NOT_DGE	UpReg
AC099860.1		0.23206	0.000247916	0.00533159	NOT_DGE	UpReg
AC101869.3		-0.250503	0.0316874	0.109863	NOT_DGE	DownReg
AC102077.1		-0.231521	0.177358	0.328909	NOT_DGE	DownReg
AC102096.1		0.154056	0.207029	0.364587	NOT_DGE	UpReg
AC102506.1		-0.103332	0.332483	0.497609	NOT_DGE	DownReg
AC102628.1		-0.0788053	0.629404	0.754644	NOT_DGE	DownReg
AC103620.3		-0.0574194	0.469681	0.624015	NOT_DGE	DownReg
AC103635.1		0.255209	0.174863	0.325774	NOT_DGE	UpReg
AC104325.1		-0.245491	0.00516113	0.0356017	NOT_DGE	DownReg
AC107707.3		-0.207541	0.071667	0.182686	NOT_DGE	DownReg
AC109152.2		0.196026	0.0223453	0.087393	NOT_DGE	UpReg
AC109227.1		-0.0633075	0.279345	0.443881	NOT_DGE	DownReg
AC110508.1		-0.354949	0.0337695	0.114029	NOT_DGE	DownReg
AC113182.4		-0.0414596	0.35262	0.518235	NOT_DGE	DownReg
AC114558.6		0.234899	0.224011	0.384797	NOT_DGE	UpReg
AC114920.2		-0.0341159	0.528325	0.673931	NOT_DGE	DownReg
AC116475.2		-0.0280117	0.655351	0.774511	NOT_DGE	DownReg
AC116769.1		-0.270993	0.00680281	0.0422725	NOT_DGE	DownReg
AC121113.1		-0.102511	0.048699	0.143558	NOT_DGE	DownReg
AC121838.2		0.249338	0.00294235	0.0251354	NOT_DGE	UpReg
AC121847.1		-0.244173	0.117497	0.250592	NOT_DGE	DownReg
AC122462.1		-0.0105467	0.874471	0.922175	NOT_DGE	DownReg
AC123679.2		-0.129105	0.401849	0.563821	NOT_DGE	DownReg
AC123684.1		0.0144708	0.830612	0.895524	NOT_DGE	UpReg
AC123686.4		-0.0114825	0.797751	0.874398	NOT_DGE	DownReg
AC124566.2		-0.0890132	0.267737	0.431253	NOT_DGE	DownReg
AC124713.2		0.0886496	0.00158065	0.0171157	NOT_DGE	UpReg
AC125061.1		-0.027437	0.527829	0.673746	NOT_DGE	DownReg
AC126938.1		0.0508564	0.447856	0.605263	NOT_DGE	UpReg
AC127333.1		0.270796	0.00412135	0.0308555	NOT_DGE	UpReg
AC127339.2		-0.0437284	0.0489101	0.143786	NOT_DGE	DownReg
AC129337.1		-0.203374	0.00203771	0.0200773	NOT_DGE	DownReg
AC130827.2		-0.0496335	0.676501	0.789892	NOT_DGE	DownReg
AC131065.2		0.00453541	0.825863	0.892267	NOT_DGE	UpReg
AC131992.1		0.249525	0.322879	0.48806	NOT_DGE	UpReg
AC132242.1		-0.144202	0.0578822	0.160057	NOT_DGE	DownReg
AC132303.1		0.0601961	0.418708	0.579184	NOT_DGE	UpReg
AC139063.2		0.0681507	0.442135	0.600273	NOT_DGE	UpReg
AC140321.1		0.227887	0.0130362	0.0631699	NOT_DGE	UpReg
AC152939.2		-0.0985027	0.0349567	0.116553	NOT_DGE	DownReg
AC153919.1		-0.0539791	0.352906	0.518536	NOT_DGE	DownReg
AC155158.1		-0.237108	0.00768829	0.0455921	NOT_DGE	DownReg
AC155937.2		0.0520548	0.455108	0.611878	NOT_DGE	UpReg
AC157555.1		0.234994	0.0198637	0.0812956	NOT_DGE	UpReg
AC157561.9		-0.154473	0.0314544	0.109467	NOT_DGE	DownReg
AC157667.1		0.291552	0.00394679	0.0300798	NOT_DGE	UpReg
AC157774.6		-0.313216	0.0317554	0.109863	NOT_DGE	DownReg
AC158971.1		0.150126	0.24919	0.411756	NOT_DGE	UpReg
AC159257.5		0.0315002	0.371567	0.535198	NOT_DGE	UpReg
AC160535.1		0.0961022	0.00537128	0.0365949	NOT_DGE	UpReg
AC161108.3		-0.143136	0.114398	0.246468	NOT_DGE	DownReg
AC161207.1		-0.0763776	0.44984	0.607363	NOT_DGE	DownReg
AC161792.1		-0.0182442	0.848128	0.905657	NOT_DGE	DownReg
AC162528.2		0.218462	0.013819	0.0652182	NOT_DGE	UpReg
AC163329.3		-0.362178	0.0241012	0.0914955	NOT_DGE	DownReg
AC163442.1		0.140721	0.00865981	0.0492411	NOT_DGE	UpReg
AC163616.2		-0.0268122	0.693421	0.802358	NOT_DGE	DownReg
AC164703.3		0.23972	0.0115695	0.0583987	NOT_DGE	UpReg
AC165086.3		-0.122056	0.367158	0.531616	NOT_DGE	DownReg
AC166328.1		0.307134	0.0139355	0.0655546	NOT_DGE	UpReg
AC166332.1		0.0420333	0.363804	0.528505	NOT_DGE	UpReg
AC167815.1		0.102562	0.00903391	0.0504883	NOT_DGE	UpReg
AC168051.1		0.163494	0.0989496	0.223798	NOT_DGE	UpReg
Acaa1a	ACAA1	-0.228034	0.00894399	0.0501591	NOT_DGE	DownReg									geneM0
Acaa2	ACAA2	0.193643	0.0266456	0.0976531	NOT_DGE	UpReg				ASD.DGE_up				SCZ.DGE_up																								geneM3
Acaca	ACACA	-0.0126836	0.84437	0.904279	NOT_DGE	DownReg																											geneM25
Acacb	ACACB	-0.348431	0.0702443	0.180653	NOT_DGE	DownReg																																geneM3
Acad11	ACAD11	0.170562	0.0948573	0.21811	NOT_DGE	UpReg									geneM0
Acad8	ACAD8	0.0857472	2.09495e-05	0.00115358	NOT_DGE	UpReg																																											geneM9
Acad9	ACAD9	0.15403	0.0179319	0.0766958	NOT_DGE	UpReg																																						geneM4
Acadl	ACADL	0.0535851	0.44147	0.599562	NOT_DGE	UpReg								SCZ.DGE_up																								geneM3
Acadm	ACADM	0.0825792	0.466217	0.621752	NOT_DGE	UpReg																																geneM3
Acads	ACADS	-0.235193	0.0265591	0.0975485	NOT_DGE	DownReg						BD.DGE_up		SCZ.DGE_up																								geneM3
Acadsb	ACADSB	-0.00795427	0.879786	0.926167	NOT_DGE	DownReg																																						geneM4
Acadvl	ACADVL	-0.108877	0.224189	0.384946	NOT_DGE	DownReg																																geneM3
Acap3	ACAP3	-0.0303504	0.770705	0.855144	NOT_DGE	DownReg							SCZ.DGE_down						geneM12
Acat1	ACAT1	0.0725618	0.361872	0.526841	NOT_DGE	UpReg									geneM0
Acat2	ACAT2	-0.15734	0.00013624	0.00384788	NOT_DGE	DownReg							SCZ.DGE_down		geneM0
Acat3	ACAT2	-0.295603	0.000431842	0.00750692	NOT_DGE	DownReg							SCZ.DGE_down		geneM0
Acbd3	ACBD3	0.130268	0.173957	0.324762	NOT_DGE	UpReg									geneM0
Acbd4	ACBD4	-0.189576	0.0346036	0.115881	NOT_DGE	DownReg									geneM0
Acbd5	ACBD5	0.236609	0.022886	0.0884296	NOT_DGE	UpReg					BD.DGE_down		SCZ.DGE_down														geneM2
Acbd6	ACBD6	-0.0932025	0.193994	0.349444	NOT_DGE	DownReg																																										geneM8
Acd	ACD	-0.198596	0.0772074	0.191921	NOT_DGE	DownReg									geneM0
Ace	ACE	-0.0927245	0.392775	0.55523	NOT_DGE	DownReg	ASD_SC	ASD							geneM0
Acer2	ACER2	-0.294305	0.0293249	0.104056	NOT_DGE	DownReg									geneM0
Acer3	ACER3	-0.103429	0.45661	0.61312	NOT_DGE	DownReg							SCZ.DGE_down														geneM2
Ache	ACHE	-0.294711	0.00140824	0.016002	NOT_DGE	DownReg	ASD_SC	ASD								geneM1
Acin1	ACIN1	-0.103338	0.0227984	0.0883374	NOT_DGE	DownReg												geneM11
Ackr1	ACKR1	-0.125503	0.115378	0.247865	NOT_DGE	DownReg						BD.DGE_up
Ackr3	ACKR3	0.207207	0.0231347	0.0890657	NOT_DGE	UpReg								SCZ.DGE_up																								geneM3
Ackr4	ACKR4	0.110269	0.134203	0.273568	NOT_DGE	UpReg									geneM0
Acly	ACLY	0.134446	0.0125705	0.0616579	NOT_DGE	UpReg			ASD.DGE_down																	geneM19
Aco1	ACO1	0.10069	0.249814	0.41215	NOT_DGE	UpReg						BD.DGE_up		SCZ.DGE_up																								geneM3
Aco2	ACO2	0.0608918	0.315629	0.481149	NOT_DGE	UpReg																																geneM3
Acot1	ACOT1	-0.179555	0.00732565	0.0443713	NOT_DGE	DownReg									geneM0
Acot1	ACOT2	-0.179555	0.00732565	0.0443713	NOT_DGE	DownReg																																geneM3
Acot11	ACOT11	0.166968	0.19692	0.35264	NOT_DGE	UpReg																																geneM3
Acot13	ACOT13	-0.0923957	0.124617	0.260268	NOT_DGE	DownReg								SCZ.DGE_up	geneM0
Acot2	ACOT1	-0.0129803	0.584426	0.719085	NOT_DGE	DownReg									geneM0
Acot2	ACOT2	-0.0129803	0.584426	0.719085	NOT_DGE	DownReg																																geneM3
Acot3	ACOT1	0.176088	0.487253	0.638889	NOT_DGE	UpReg									geneM0
Acot3	ACOT2	0.176088	0.487253	0.638889	NOT_DGE	UpReg																																geneM3
Acot4	ACOT4	0.241452	0.0127009	0.062081	NOT_DGE	UpReg																																						geneM4
Acot6	ACOT6	-0.213318	7.19425e-05	0.00255617	NOT_DGE	DownReg								SCZ.DGE_up																								geneM3
Acot7	ACOT7	-0.167703	0.0498831	0.14558	NOT_DGE	DownReg										geneM1
Acot8	ACOT8	-0.194092	0.00819836	0.0475527	NOT_DGE	DownReg									geneM0
Acot9	ACOT9	0.0109068	0.693546	0.802429	NOT_DGE	UpReg						BD.DGE_up		SCZ.DGE_up	geneM0
Acox1	ACOX1	0.0991573	0.35881	0.523761	NOT_DGE	UpReg								SCZ.DGE_up																								geneM3
Acox3	ACOX3	0.162622	0.00638193	0.040589	NOT_DGE	UpReg									geneM0
Acp1		0.0264737	0.233783	0.395035	NOT_DGE	UpReg
Acp2	ACP2	-0.0971846	0.0212516	0.0847132	NOT_DGE	DownReg							SCZ.DGE_down																															geneM4
Acp6	ACP6	-0.0853927	0.0477048	0.142042	NOT_DGE	DownReg								SCZ.DGE_up																								geneM3
Acrbp	ACRBP	-0.110315	0.300538	0.465803	NOT_DGE	DownReg									geneM0
Acsbg1	ACSBG1	-0.0428282	0.749116	0.839233	NOT_DGE	DownReg																																geneM3
Acsf2	ACSF2	0.0681508	0.412615	0.573227	NOT_DGE	UpReg																																geneM3
Acsf3	ACSF3	-0.117524	0.28735	0.451971	NOT_DGE	DownReg									geneM0
Acsl1	ACSL1	0.197026	0.0983041	0.222972	NOT_DGE	UpReg																					geneM2
Acsl3	ACSL3	0.346276	0.168963	0.318827	NOT_DGE	UpReg									geneM0
Acsl4	ACSL4	0.268118	0.0062062	0.0398098	NOT_DGE	UpReg																	geneM16
Acsl5	ACSL5	0.18032	0.00449534	0.0326747	NOT_DGE	UpReg								SCZ.DGE_up																															geneM5
Acsl6	ACSL6	0.169651	0.241412	0.403706	NOT_DGE	UpReg																																geneM3
Acsm3	ACSM3	0.173281	0.265966	0.429271	NOT_DGE	UpReg																																						geneM4
Acss1	ACSS1	-0.000355529	0.997489	0.998767	NOT_DGE	DownReg																																geneM3
Acss2	ACSS2	0.0321376	0.70753	0.811376	NOT_DGE	UpReg																					geneM2
Acta1	ACTA1	-0.200282	0.0205954	0.0831133	NOT_DGE	DownReg									geneM0
Acta2	ACTA2	-0.106796	0.528336	0.673931	NOT_DGE	DownReg																													geneM27
Actb	ACTB	-0.144871	0.00032985	0.00643511	NOT_DGE	DownReg																																									geneM7
Actg1	ACTG1	0.156073	0.0619035	0.166402	NOT_DGE	UpReg						BD.DGE_up			geneM0
Actl10	ACTL10	-0.061156	0.0297428	0.105179	NOT_DGE	DownReg					BD.DGE_down				geneM0
Actl6a	ACTL6A	0.066953	0.514086	0.661845	NOT_DGE	UpReg																					geneM2
Actl6b	ACTL6B	-0.243576	0.0020141	0.0199749	NOT_DGE	DownReg										geneM1
Actn1	ACTN1	0.0795176	0.253579	0.416251	NOT_DGE	UpReg								SCZ.DGE_up		geneM1
Actn2	ACTN2	-0.116131	0.370647	0.534236	NOT_DGE	DownReg										geneM1
Actn4	ACTN4	0.0630511	0.375821	0.538338	NOT_DGE	UpReg		ASD																			geneM2
Actr10	ACTR10	0.0501569	0.499848	0.649643	NOT_DGE	UpReg																																										geneM8
Actr1a	ACTR1A	-0.0765151	0.0479468	0.142378	NOT_DGE	DownReg																																											geneM9
Actr1b	ACTR1B	0.0434517	0.301477	0.466747	NOT_DGE	UpReg			ASD.DGE_down																																			geneM4
Actr2	ACTR2	0.262541	0.000194701	0.00468166	NOT_DGE	UpReg																																									geneM7
Actr3b	ACTR3B	0.0796982	0.221356	0.381575	NOT_DGE	UpReg																	geneM16
Actr3b	ACTR3C	0.0796982	0.221356	0.381575	NOT_DGE	UpReg				ASD.DGE_up					geneM0
Actr5	ACTR5	-0.0820373	0.316844	0.482379	NOT_DGE	DownReg								SCZ.DGE_up	geneM0
Actr6	ACTR6	0.338909	0.128155	0.264934	NOT_DGE	UpReg									geneM0
Actr8	ACTR8	-0.0467532	0.40774	0.56897	NOT_DGE	DownReg									geneM0
Actrt3	ACTRT3	-0.206578	0.264662	0.427981	NOT_DGE	DownReg											geneM10
Acvr1	ACVR1	0.155963	0.0376808	0.122239	NOT_DGE	UpReg					BD.DGE_down		SCZ.DGE_down														geneM2
Acvr1b	ACVR1B	0.144687	0.000372953	0.00690533	NOT_DGE	UpReg						BD.DGE_up								geneM13
Acvr2a	ACVR2A	0.043394	0.702839	0.808109	NOT_DGE	UpReg																	geneM16
Acvr2b	ACVR2B	-0.16667	0.196219	0.352104	NOT_DGE	DownReg								SCZ.DGE_up	geneM0
Acvrl1	ACVRL1	0.176939	0.294632	0.459617	NOT_DGE	UpReg																																							geneM5
Acy1	ABHD14A-ACY1	0.142094	0.177314	0.328876	NOT_DGE	UpReg									geneM0
Acy1	ACY1	0.142094	0.177314	0.328876	NOT_DGE	UpReg		ASD																														geneM3
Acyp1	ACYP1	0.0382473	0.14866	0.292174	NOT_DGE	UpReg										geneM1
Adal	ADAL	-0.0481296	0.565284	0.70471	NOT_DGE	DownReg									geneM0
Adam10	ADAM10	0.163986	0.0394084	0.125912	NOT_DGE	UpReg																					geneM2
Adam11	ADAM11	-0.0397877	0.560738	0.701612	NOT_DGE	DownReg							SCZ.DGE_down			geneM1
Adam15	ADAM15	-0.0252746	0.72181	0.821465	NOT_DGE	DownReg																					geneM2
Adam17	ADAM17	-0.0301887	0.676805	0.790031	NOT_DGE	DownReg																																geneM3
Adam19		0.238859	4.96254e-05	0.00199758	NOT_DGE	UpReg
Adam1a		0.092451	0.625735	0.751876	NOT_DGE	UpReg
Adam23	ADAM23	0.267235	0.00617066	0.0396312	NOT_DGE	UpReg			ASD.DGE_down							geneM1
Adam8	ADAM8	0.046462	0.804838	0.878931	NOT_DGE	UpReg									geneM0
Adam9	ADAM9	0.432455	0.0316955	0.109863	NOT_DGE	UpReg									geneM0
Adamts1	ADAMTS1	-0.00610779	0.979689	0.988627	NOT_DGE	DownReg																																							geneM5
Adamts10	ADAMTS10	0.150133	0.00230938	0.0217434	NOT_DGE	UpReg									geneM0
Adamts15	ADAMTS15	0.242932	0.00307535	0.0258735	NOT_DGE	UpReg									geneM0
Adamts16	ADAMTS16	0.0694419	0.610606	0.73995	NOT_DGE	UpReg									geneM0
Adamts18	ADAMTS18	0.0948007	0.232177	0.393458	NOT_DGE	UpReg		ASD							geneM0
Adamts2	ADAMTS2	-0.310221	0.0603751	0.164052	NOT_DGE	DownReg						BD.DGE_up		SCZ.DGE_up	geneM0
Adamts20	ADAMTS20	0.0866369	0.394938	0.557312	NOT_DGE	UpReg
Adamts3	ADAMTS3	0.0678213	0.0356132	0.118061	NOT_DGE	UpReg								SCZ.DGE_up																										geneM31
Adamts4	ADAMTS4	0.0458076	0.309784	0.475326	NOT_DGE	UpReg																					geneM2
Adamts6	ADAMTS6	-0.257432	0.338175	0.503993	NOT_DGE	DownReg									geneM0
Adamtsl1	ADAMTSL1	0.149222	0.0023257	0.0218345	NOT_DGE	UpReg			ASD.DGE_down				SCZ.DGE_down		geneM0
Adamtsl2	ADAMTSL2	-0.0737397	0.429368	0.589293	NOT_DGE	DownReg									geneM0
Adap1	ADAP1	-0.14499	0.015858	0.0710477	NOT_DGE	DownReg													geneM12
Adap2	ADAP2	0.140993	0.23337	0.394731	NOT_DGE	UpReg																																								geneM6
Adar	ADAR	-0.0928442	0.0543088	0.153474	NOT_DGE	DownReg																																			geneM32
Adarb1	ADARB1	0.242292	0.000367997	0.00686352	NOT_DGE	UpReg		ASD								geneM1
Adarb2	ADARB2	0.153855	0.299456	0.464748	NOT_DGE	UpReg							SCZ.DGE_down														geneM2
Adat1	ADAT1	-0.0577146	0.389687	0.552107	NOT_DGE	DownReg																					geneM2
Adck1	ADCK1	0.0789023	0.15846	0.305025	NOT_DGE	UpReg			ASD.DGE_down																		geneM2
Adck2	ADCK2	-0.123718	0.0432226	0.133542	NOT_DGE	DownReg																					geneM2
Adck3		-0.277023	4.47181e-05	0.00187727	NOT_DGE	DownReg
Adck4		-0.181084	0.0489121	0.143786	NOT_DGE	DownReg
Adck5	ADCK5	-0.128407	0.0152013	0.0690429	NOT_DGE	DownReg													geneM12
Adcy1	ADCY1	0.0824428	0.373371	0.536945	NOT_DGE	UpReg			ASD.DGE_down							geneM1
Adcy2	ADCY2	0.163859	0.00418127	0.031121	NOT_DGE	UpReg								SCZ.DGE_up																								geneM3
Adcy3	ADCY3	0.0701659	0.517331	0.664383	NOT_DGE	UpReg								SCZ.DGE_up		geneM1
Adcy4	ADCY4	-0.0785913	0.141038	0.282735	NOT_DGE	DownReg									geneM0
Adcy5	ADCY5	0.0403004	0.468391	0.623132	NOT_DGE	UpReg	ASD_SC	ASD																			geneM2
Adcy6	ADCY6	0.0339917	0.692124	0.801148	NOT_DGE	UpReg																											geneM25
Adcy7	ADCY7	0.206087	0.0418648	0.131259	NOT_DGE	UpReg																																								geneM6
Adcy8	ADCY8	-0.00672215	0.935225	0.959747	NOT_DGE	DownReg								SCZ.DGE_up																								geneM3
Adcy9	ADCY9	0.452104	0.0184503	0.0778916	NOT_DGE	UpReg										geneM1
Adcyap1	ADCYAP1	0.0567952	0.651404	0.771999	NOT_DGE	UpReg								SCZ.DGE_up															geneM21
Adcyap1r1	ADCYAP1R1	-0.0322469	0.64211	0.765113	NOT_DGE	DownReg				ASD.DGE_up				SCZ.DGE_up																								geneM3
Add1	ADD1	0.0148258	0.443277	0.601054	NOT_DGE	UpReg									geneM0
Add2	ADD2	0.177989	1.15167e-05	0.000810787	NOT_DGE	UpReg										geneM1
Add3	ADD3	0.237671	0.233795	0.395035	NOT_DGE	UpReg																																geneM3
Adgra1	ADGRA1	0.182987	0.106064	0.234551	NOT_DGE	UpReg							SCZ.DGE_down
Adgra2	ADGRA2	0.216723	0.000341667	0.00654519	NOT_DGE	UpReg							SCZ.DGE_down
Adgra3	ADGRA3	0.14316	0.138351	0.279604	NOT_DGE	UpReg
Adgrb1	ADGRB1	-0.0255781	0.773963	0.857711	NOT_DGE	DownReg							SCZ.DGE_down
Adgrb2	ADGRB2	-0.0108781	0.806452	0.879829	NOT_DGE	DownReg							SCZ.DGE_down
Adgrd1	ADGRD1	0.0271216	0.747127	0.838047	NOT_DGE	UpReg
Adgre5	ADGRE5	0.0361896	0.618133	0.746255	NOT_DGE	UpReg
Adgrf4	ADGRF4	0.143872	0.271298	0.434788	NOT_DGE	UpReg
Adgrf5	ADGRF5	0.176107	0.175333	0.326203	NOT_DGE	UpReg
Adgrg1	ADGRG1	-0.0696157	0.671571	0.786447	NOT_DGE	DownReg								SCZ.DGE_up
Adgrl1	ADGRL1	0.0957142	0.07788	0.193053	NOT_DGE	UpReg			ASD.DGE_down				SCZ.DGE_down
Adgrl2	ADGRL2	0.323599	0.0259794	0.0961752	NOT_DGE	UpReg
Adgrl3	ADGRL3	-0.0215831	0.750844	0.840061	NOT_DGE	DownReg								SCZ.DGE_up
Adgrl4	ADGRL4	0.156542	0.107467	0.236666	NOT_DGE	UpReg
Adh5	ADH5	0.00998582	0.828069	0.893691	NOT_DGE	UpReg				ASD.DGE_up				SCZ.DGE_up																								geneM3
Adhfe1	ADHFE1	0.0533628	0.818713	0.887131	NOT_DGE	UpReg																																geneM3
Adi1	ADI1	-0.125846	0.00509403	0.0354041	NOT_DGE	DownReg																																geneM3
Adipor1	ADIPOR1	0.169383	0.115053	0.247376	NOT_DGE	UpReg								SCZ.DGE_up	geneM0
Adipor2	ADIPOR2	-0.0183138	0.79381	0.8717	NOT_DGE	DownReg																					geneM2
Adk	ADK	0.0431085	0.640188	0.763472	NOT_DGE	UpReg	ASD_SC	ASD																																							geneM7
Adnp	ADNP	0.207435	0.00504244	0.0352999	NOT_DGE	UpReg	ASD_SC	ASD						SCZ.DGE_up																							geneM29
Adnp2	ADNP2	0.252441	0.00310138	0.0259792	NOT_DGE	UpReg								SCZ.DGE_up													geneM2
Ado	ADO	0.129808	0.102818	0.229832	NOT_DGE	UpReg			ASD.DGE_down				SCZ.DGE_down														geneM2
Adora1	ADORA1	0.0155825	0.72674	0.824751	NOT_DGE	UpReg			ASD.DGE_down				SCZ.DGE_down														geneM2
Adora2b	ADORA2B	-0.0601176	0.405342	0.566464	NOT_DGE	DownReg								SCZ.DGE_up																								geneM3
Adora3	ADORA3	-0.0531006	0.69323	0.802283	NOT_DGE	DownReg		ASD																																						geneM6
Adpgk	ADPGK	0.107697	0.293981	0.459091	NOT_DGE	UpReg										geneM1
Adprh	ADPRH	-0.00605627	0.812833	0.883363	NOT_DGE	DownReg																																								geneM6
Adprhl2	ADPRS	-0.194084	0.0260258	0.0962909	NOT_DGE	DownReg
Adprm	ADPRM	0.170063	3.06714e-07	8.66977e-05	NOT_DGE	UpReg									geneM0
Adra1a	ADRA1A	0.00739144	0.929101	0.956704	NOT_DGE	UpReg																																geneM3
Adra1b	ADRA1B	0.340113	0.121841	0.256549	NOT_DGE	UpReg							SCZ.DGE_down																geneM21
Adra2a	ADRA2A	-0.159641	0.442016	0.600176	NOT_DGE	DownReg																					geneM2
Adra2c	ADRA2C	0.0459589	0.480458	0.632989	NOT_DGE	UpReg									geneM0
Adrb3	ADRB3	-0.0317757	0.562526	0.702536	NOT_DGE	DownReg
Adrbk1		-0.057157	0.0444456	0.136097	NOT_DGE	DownReg
Adrbk2		0.124522	0.535324	0.680116	NOT_DGE	UpReg
Adrm1	ADRM1	-0.14293	0.108019	0.237634	NOT_DGE	DownReg															geneM14
Adsl	ADSL	0.0160896	0.797247	0.8743	NOT_DGE	UpReg	ASD_SC	ASD							geneM0
Adss	ADSS2	-0.0382015	0.0643828	0.170775	NOT_DGE	DownReg
Adssl1	ADSS1	0.058069	0.628868	0.754286	NOT_DGE	UpReg
Aebp1	AEBP1	0.0592191	0.8848	0.928427	NOT_DGE	UpReg								SCZ.DGE_up																								geneM3
Aebp2	AEBP2	0.0704072	0.247107	0.409485	NOT_DGE	UpReg								SCZ.DGE_up	geneM0
Aen	AEN	0.0771651	0.532576	0.677899	NOT_DGE	UpReg											geneM10
Aes		-0.287499	0.00156105	0.0169714	NOT_DGE	DownReg
Afap1	AFAP1	0.261644	0.00970125	0.0523547	NOT_DGE	UpReg									geneM0
Afap1l1	AFAP1L1	0.466255	0.0192552	0.0796768	NOT_DGE	UpReg									geneM0
Afap1l2	AFAP1L2	0.015626	0.856761	0.910747	NOT_DGE	UpReg									geneM0
Aff1	AFF1	0.110296	0.239796	0.401871	NOT_DGE	UpReg				ASD.DGE_up				SCZ.DGE_up																															geneM5
Aff2	AFF2	0.00645376	0.83423	0.897826	NOT_DGE	UpReg	ASD_SC	ASD							geneM0
Aff3	AFF3	0.26169	0.00875004	0.0496055	NOT_DGE	UpReg										geneM1
Aff4	AFF4	0.236481	0.089687	0.210483	NOT_DGE	UpReg		ASD		ASD.DGE_up																																			geneM5
Afg3l1		-0.158962	0.000334904	0.00649388	NOT_DGE	DownReg
Afg3l2	AFG3L2	0.238999	0.0122025	0.060513	NOT_DGE	UpReg			ASD.DGE_down																																								geneM9
Aftph	AFTPH	0.169586	0.161975	0.309684	NOT_DGE	UpReg									geneM0
Aga	AGA	-0.0403193	0.507346	0.656182	NOT_DGE	DownReg							SCZ.DGE_down														geneM2
Agap1	AGAP1	-0.0324602	0.785882	0.866391	NOT_DGE	DownReg	ASD_SC	ASD																			geneM2
Agap2	AGAP2	0.146263	0.00106979	0.0134094	NOT_DGE	UpReg																		geneM17
Agap3	AGAP3	-0.119388	0.0604479	0.164067	NOT_DGE	DownReg																		geneM17
Agbl3	AGBL3	0.252577	0.110604	0.2413	NOT_DGE	UpReg			ASD.DGE_down						geneM0
Agbl4	AGBL4	0.210973	0.0105899	0.055502	NOT_DGE	UpReg	ASD_SC	ASD								geneM1
Agbl5	AGBL5	-0.294356	0.000102984	0.00321068	NOT_DGE	DownReg									geneM0
Agfg1	AGFG1	0.136169	0.0906112	0.211879	NOT_DGE	UpReg									geneM0
Agfg2	AGFG2	0.0820956	0.00187782	0.019063	NOT_DGE	UpReg									geneM0
Agk	AGK	0.287742	0.0040028	0.0303431	NOT_DGE	UpReg										geneM1
Agl	AGL	0.142488	0.0299422	0.105561	NOT_DGE	UpReg																																geneM3
Agmo	AGMO	0.0980929	0.243651	0.406349	NOT_DGE	UpReg	ASD_SC	ASD																			geneM2
Ago1	AGO1	0.0320969	0.399667	0.561804	NOT_DGE	UpReg										geneM1
Ago2	AGO2	0.080503	0.0111666	0.0571126	NOT_DGE	UpReg									geneM0
Ago3	AGO3	0.0638877	0.35772	0.522656	NOT_DGE	UpReg									geneM0
Ago4	AGO4	0.00960881	0.820728	0.888772	NOT_DGE	UpReg																														geneM28
Agpat1	AGPAT1	0.0043384	0.785268	0.865939	NOT_DGE	UpReg																																									geneM7
Agpat3	AGPAT3	0.11776	0.127067	0.263112	NOT_DGE	UpReg																																						geneM4
Agpat4	AGPAT4	-0.0857015	0.066103	0.173833	NOT_DGE	DownReg							SCZ.DGE_down														geneM2
Agpat5	AGPAT5	0.104249	0.247765	0.410255	NOT_DGE	UpReg																																geneM3
Agpat9		-0.0288778	0.877634	0.924743	NOT_DGE	DownReg
Agrn	AGRN	0.119526	0.174752	0.325711	NOT_DGE	UpReg							SCZ.DGE_down								geneM14
Agtpbp1	AGTPBP1	0.197167	0.000767166	0.0107942	NOT_DGE	UpReg							SCZ.DGE_down														geneM2
Agtrap	AGTRAP	-0.247622	0.0591197	0.161965	NOT_DGE	DownReg				ASD.DGE_up				SCZ.DGE_up																								geneM3
Ahcy	AHCY	0.146457	0.118018	0.251286	NOT_DGE	UpReg									geneM0
Ahcyl1	AHCYL1	0.236535	0.00975549	0.0525359	NOT_DGE	UpReg								SCZ.DGE_up																								geneM3
Ahcyl2	AHCYL2	0.170417	0.331148	0.496312	NOT_DGE	UpReg																																geneM3
Ahdc1	AHDC1	0.242039	0.00836167	0.0481705	NOT_DGE	UpReg	ASD_SC	ASD																																							geneM7
Ahi1	AHI1	-0.179576	0.0517917	0.14925	NOT_DGE	DownReg	ASD_SC	ASD					SCZ.DGE_down																																			geneM8
Ahnak	AHNAK	-0.0632293	0.0538834	0.152718	NOT_DGE	DownReg				ASD.DGE_up				SCZ.DGE_up																								geneM3
Ahr	AHR	-0.0725671	0.144536	0.286816	NOT_DGE	DownReg																					geneM2
Ahsa1	AHSA1	-0.0610735	0.0966605	0.220522	NOT_DGE	DownReg								SCZ.DGE_up			geneM10
Ahsa2		0.0937102	0.0190798	0.0792346	NOT_DGE	UpReg
AI846148		-0.0798145	0.112722	0.24448	NOT_DGE	DownReg
Aida	AIDA	-0.187585	0.305265	0.471177	NOT_DGE	DownReg				ASD.DGE_up				SCZ.DGE_up	geneM0
Aif1	AIF1	-0.366236	0.0223899	0.0874995	NOT_DGE	DownReg							SCZ.DGE_down																																	geneM6
Aif1l	AIF1L	-0.200237	0.42181	0.582313	NOT_DGE	DownReg																					geneM2
Aifm1	AIFM1	-0.0474451	0.0461736	0.139309	NOT_DGE	DownReg																																											geneM9
Aifm2	AIFM2	-0.0518853	0.638947	0.762602	NOT_DGE	DownReg								SCZ.DGE_up																								geneM3
Aifm3	AIFM3	-0.279935	0.0222554	0.0872117	NOT_DGE	DownReg																																geneM3
Aig1	AIG1	-0.00918498	0.84855	0.905956	NOT_DGE	DownReg																					geneM2
Aimp1	AIMP1	-0.275044	0.00535466	0.0365172	NOT_DGE	DownReg									geneM0
Aimp2	AIMP2	-0.0703011	0.209236	0.367101	NOT_DGE	DownReg							SCZ.DGE_down		geneM0
Aip	AIP	-0.191219	0.00100379	0.0129364	NOT_DGE	DownReg																					geneM2
Ajap1	AJAP1	0.1809	0.0133332	0.063885	NOT_DGE	UpReg										geneM1
Ak1	AK1	-0.015041	0.234731	0.396044	NOT_DGE	DownReg																																geneM3
Ak2	AK2	-0.127221	0.238124	0.40001	NOT_DGE	DownReg									geneM0
Ak3	AK3	0.0836368	0.107035	0.236082	NOT_DGE	UpReg				ASD.DGE_up																												geneM3
Ak4	AK4	0.210631	0.00915604	0.0509247	NOT_DGE	UpReg																																geneM3
Ak5	AK5	0.146975	0.00179367	0.018455	NOT_DGE	UpReg										geneM1
Ak6	TAF9	0.122611	0.147493	0.290689	NOT_DGE	UpReg																																										geneM8
Akap1	AKAP1	0.150104	0.22583	0.386637	NOT_DGE	UpReg								SCZ.DGE_up		geneM1
Akap11	AKAP11	0.0655717	0.050701	0.147073	NOT_DGE	UpReg																																									geneM7
Akap12	AKAP12	-0.115355	0.0124819	0.0613486	NOT_DGE	DownReg				ASD.DGE_up		BD.DGE_up		SCZ.DGE_up	geneM0
Akap13	AKAP13	0.00868828	0.924951	0.954053	NOT_DGE	UpReg									geneM0
Akap17b		-0.177822	0.111822	0.243224	NOT_DGE	DownReg
Akap5	AKAP5	0.225699	0.0125251	0.0615134	NOT_DGE	UpReg										geneM1
Akap7	AKAP7	0.0412015	0.000113377	0.0034337	NOT_DGE	UpReg																																geneM3
Akap8	AKAP8	0.153473	0.179838	0.332299	NOT_DGE	UpReg									geneM0
Akap8l	AKAP8L	-0.0530746	0.251773	0.414623	NOT_DGE	DownReg								SCZ.DGE_up				geneM11
Akap9	AKAP9	0.0494664	0.145005	0.287613	NOT_DGE	UpReg	ASD_SC	ASD										geneM11
Akirin2	AKIRIN2	0.0871117	0.313122	0.478601	NOT_DGE	UpReg								SCZ.DGE_up																																	geneM7
Akna	AKNA	-0.196219	0.181108	0.333772	NOT_DGE	DownReg				ASD.DGE_up																																				geneM6
Akr1a1	AKR1A1	-0.167708	8.60019e-06	0.000688015	NOT_DGE	DownReg																																						geneM4
Akr1b10	AKR1B10	-0.160467	0.230672	0.391898	NOT_DGE	DownReg
Akr1b3	AKR1B1	-0.142734	0.239234	0.401142	NOT_DGE	DownReg									geneM0
Akr1b8	AKR1B10	0.0262913	0.851136	0.907552	NOT_DGE	UpReg
Akr1c14		0.263248	0.0244934	0.0923161	NOT_DGE	UpReg
Akr1e1	AKR1E2	0.0658596	0.581676	0.717071	NOT_DGE	UpReg									geneM0
Akr7a5	AKR7L	-0.203547	3.53421e-08	2.85966e-05	NOT_DGE	DownReg
Akt1	AKT1	0.0534531	0.299451	0.464748	NOT_DGE	UpReg						BD.DGE_up									geneM14
Akt1s1	AKT1S1	-0.18629	0.0488835	0.143786	NOT_DGE	DownReg					BD.DGE_down				geneM0
Akt2	AKT2	-0.00916424	0.874662	0.9223	NOT_DGE	DownReg									geneM0
Akt3	AKT3	0.0334098	0.0841938	0.202679	NOT_DGE	UpReg							SCZ.DGE_down		geneM0
Aktip	AKTIP	0.0671444	0.0203274	0.0824768	NOT_DGE	UpReg										geneM1
AL365322.1		-0.0229553	0.790133	0.869345	NOT_DGE	DownReg
Alas1	ALAS1	-0.00184176	0.952998	0.970858	NOT_DGE	DownReg									geneM0
Alcam	ALCAM	-0.122245	0.202092	0.358473	NOT_DGE	DownReg							SCZ.DGE_down												geneM18
Aldh16a1	ALDH16A1	-0.174984	0.0110954	0.056971	NOT_DGE	DownReg																																						geneM4
Aldh18a1	ALDH18A1	-0.0560588	0.272853	0.436071	NOT_DGE	DownReg				ASD.DGE_up																												geneM3
Aldh1a1	ALDH1A1	0.456836	0.086151	0.205637	NOT_DGE	UpReg							SCZ.DGE_down																									geneM3
Aldh1a2	ALDH1A2	0.122885	0.727866	0.825395	NOT_DGE	UpReg									geneM0
Aldh1a3	ALDH1A3	0.0157704	0.840706	0.901972	NOT_DGE	UpReg		ASD								geneM1
Aldh1b1	ALDH1B1	-0.285312	0.0343964	0.115472	NOT_DGE	DownReg									geneM0
Aldh1l1	ALDH1L1	-0.138153	0.239892	0.401926	NOT_DGE	DownReg								SCZ.DGE_up																								geneM3
Aldh1l2	ALDH1L2	0.0548179	0.443769	0.6014	NOT_DGE	UpReg									geneM0
Aldh2	ALDH2	-0.0046054	0.889302	0.931099	NOT_DGE	DownReg								SCZ.DGE_up																								geneM3
Aldh3a2	ALDH3A2	0.0838603	0.161287	0.308738	NOT_DGE	UpReg								SCZ.DGE_up	geneM0
Aldh3b1	ALDH3B1	-0.000576984	0.997615	0.998767	NOT_DGE	DownReg																																geneM3
Aldh3b2	ALDH3B2	0.100578	0.602586	0.733904	NOT_DGE	UpReg
Aldh4a1	ALDH4A1	-0.0638404	0.0936666	0.216154	NOT_DGE	DownReg				ASD.DGE_up				SCZ.DGE_up																								geneM3
Aldh5a1	ALDH5A1	0.104657	0.343641	0.509394	NOT_DGE	UpReg	ASD_SC	ASD																														geneM3
Aldh6a1	ALDH6A1	0.142945	0.4257	0.586156	NOT_DGE	UpReg								SCZ.DGE_up																								geneM3
Aldh7a1	ALDH7A1	-0.0836742	0.42974	0.589593	NOT_DGE	DownReg																																geneM3
Aldh9a1		0.0417952	0.744885	0.836934	NOT_DGE	UpReg
Aldoa	ALDOA	-0.219911	0.0650673	0.171927	NOT_DGE	DownReg								SCZ.DGE_up																																	geneM7
Aldob	ALDOB	0.0761756	0.7095	0.812537	NOT_DGE	UpReg																					geneM2
Aldoc	ALDOC	-0.0657257	0.514283	0.661845	NOT_DGE	DownReg																																geneM3
Alg1	ALG1	-0.0396498	0.434974	0.594484	NOT_DGE	DownReg																																						geneM4
Alg1	ALG1L	-0.0396498	0.434974	0.594484	NOT_DGE	DownReg																																						geneM4
Alg1	ALG1L2	-0.0396498	0.434974	0.594484	NOT_DGE	DownReg
Alg10b	ALG10	0.30551	0.0170118	0.0742078	NOT_DGE	UpReg									geneM0
Alg10b	ALG10B	0.30551	0.0170118	0.0742078	NOT_DGE	UpReg									geneM0
Alg11	ALG11	0.0432885	0.395134	0.557341	NOT_DGE	UpReg							SCZ.DGE_down		geneM0
Alg12	ALG12	0.147017	0.170606	0.3205	NOT_DGE	UpReg									geneM0
Alg13		0.268817	0.0164726	0.0727791	NOT_DGE	UpReg
Alg14	ALG14	-0.0688505	0.0545803	0.153769	NOT_DGE	DownReg							SCZ.DGE_down																															geneM4
Alg2	ALG2	0.127928	0.13139	0.269561	NOT_DGE	UpReg									geneM0
Alg3	ALG3	-0.129534	0.0104008	0.0547139	NOT_DGE	DownReg									geneM0
Alg5	ALG5	-0.0607828	0.000679378	0.0100135	NOT_DGE	DownReg							SCZ.DGE_down																															geneM4
Alg6	ALG6	0.0643213	0.398423	0.560551	NOT_DGE	UpReg	ASD_SC	ASD																																				geneM4
Alg8	ALG8	0.112782	0.183579	0.336648	NOT_DGE	UpReg									geneM0
Alg9	ALG9	-0.0944041	0.304592	0.470538	NOT_DGE	DownReg									geneM0
Alk	ALK	0.162288	2.81656e-05	0.00139403	NOT_DGE	UpReg									geneM0
Alkbh1	ALKBH1	-0.0515128	0.0653861	0.17259	NOT_DGE	DownReg									geneM0
Alkbh2	ALKBH2	-0.256131	0.0607485	0.164549	NOT_DGE	DownReg						BD.DGE_up			geneM0
Alkbh3	ALKBH3	-0.130367	0.344759	0.510516	NOT_DGE	DownReg									geneM0
Alkbh4	ALKBH4	-0.0984743	0.0427356	0.132974	NOT_DGE	DownReg															geneM14
Alkbh5	ALKBH5	0.0665661	0.350654	0.516254	NOT_DGE	UpReg								SCZ.DGE_up		geneM1
Alkbh6	ALKBH6	-0.218741	0.0402406	0.127551	NOT_DGE	DownReg																																										geneM8
Alkbh7	ALKBH7	-0.213392	0.0653796	0.17259	NOT_DGE	DownReg									geneM0
Alkbh8	ALKBH8	0.270661	3.95352e-05	0.00175319	NOT_DGE	UpReg																																										geneM8
Alms1	ALMS1	-0.0197386	0.260684	0.423829	NOT_DGE	DownReg									geneM0
Alox12b	ALOX12B	0.205025	0.0222517	0.0872117	NOT_DGE	UpReg			ASD.DGE_down			BD.DGE_up		SCZ.DGE_up						geneM13
Alox5ap	ALOX5AP	-0.286708	0.0102217	0.0540849	NOT_DGE	DownReg		ASD																																						geneM6
Alox8	ALOX15B	-0.0797549	0.250526	0.413106	NOT_DGE	DownReg						BD.DGE_up		SCZ.DGE_up						geneM13
Aloxe3	ALOXE3	-0.282084	0.0610281	0.165025	NOT_DGE	DownReg						BD.DGE_up		SCZ.DGE_up																																	geneM7
Alpk1	ALPK1	0.0219087	0.768189	0.853587	NOT_DGE	UpReg																																								geneM6
Alpl	ALPL	-0.245644	0.0117764	0.0590909	NOT_DGE	DownReg					BD.DGE_down		SCZ.DGE_down		geneM0
Als2	ALS2	0.0279432	0.786044	0.866419	NOT_DGE	UpReg										geneM1
Als2cl	ALS2CL	-0.0326657	0.589722	0.723292	NOT_DGE	DownReg														geneM13
Alyref	ALYREF	0.0201051	0.907503	0.943091	NOT_DGE	UpReg									geneM0
Alyref2	ALYREF	-0.00638811	0.969545	0.982053	NOT_DGE	DownReg									geneM0
Amacr	AMACR	0.150042	0.0594062	0.1624	NOT_DGE	UpReg						BD.DGE_up			geneM0
Ambra1	AMBRA1	0.0974435	0.220013	0.379879	NOT_DGE	UpReg															geneM14
Amd1	AMD1	0.189366	0.061981	0.166562	NOT_DGE	UpReg										geneM1
Amdhd2	AMDHD2	-0.219938	0.000200903	0.00470624	NOT_DGE	DownReg									geneM0
Amer1	AMER1	-0.177765	0.000215162	0.00489827	NOT_DGE	DownReg									geneM0
Amer2	AMER2	-0.0349315	0.38764	0.550354	NOT_DGE	DownReg																					geneM2
Amer3	AMER3	0.229198	0.0353611	0.117501	NOT_DGE	UpReg										geneM1
Amfr	AMFR	0.191787	0.0886378	0.209086	NOT_DGE	UpReg						BD.DGE_up		SCZ.DGE_up													geneM2
Amh	AMH	-0.236558	0.0824411	0.200162	NOT_DGE	DownReg									geneM0
Amigo1	AMIGO1	0.0750938	0.107397	0.236594	NOT_DGE	UpReg										geneM1
Amigo2	AMIGO2	0.0696208	0.540903	0.685083	NOT_DGE	UpReg																							geneM21
Amigo3	AMIGO3	0.0818646	0.369303	0.533023	NOT_DGE	UpReg									geneM0
Ammecr1	AMMECR1	-0.0555906	0.254104	0.416682	NOT_DGE	DownReg																														geneM28
Ammecr1l	AMMECR1L	0.300256	0.0828778	0.200725	NOT_DGE	UpReg									geneM0
Amn	AMN	-0.467693	0.00931176	0.0512513	NOT_DGE	DownReg									geneM0
Amn1	AMN1	-0.0331364	0.217956	0.377352	NOT_DGE	DownReg																																										geneM8
Amot	AMOT	0.0752315	0.475297	0.62944	NOT_DGE	UpReg																																geneM3
Amotl1	AMOTL1	-0.0200159	0.277491	0.441487	NOT_DGE	DownReg																					geneM2
Amotl2	AMOTL2	0.10209	0.275859	0.43957	NOT_DGE	UpReg																					geneM2
Ampd2	AMPD2	-0.0564927	0.236358	0.397997	NOT_DGE	DownReg										geneM1
Ampd3	AMPD3	0.00897447	0.919166	0.950321	NOT_DGE	UpReg																					geneM2
Amph	AMPH	0.104703	0.0519045	0.149474	NOT_DGE	UpReg										geneM1
Amt	AMT	0.290361	0.0268533	0.0980689	NOT_DGE	UpReg	ASD_SC	ASD				BD.DGE_up																										geneM3
Amy1		-0.0830767	0.507354	0.656182	NOT_DGE	DownReg
Amz1	AMZ1	0.143804	0.101261	0.227689	NOT_DGE	UpReg				ASD.DGE_up																	geneM2
Amz2	AMZ2	-0.132418	0.0264372	0.097264	NOT_DGE	DownReg									geneM0
Anapc1	ANAPC1	0.150997	0.12661	0.262721	NOT_DGE	UpReg			ASD.DGE_down				SCZ.DGE_down																																				geneM9
Anapc10	ANAPC10	0.0492572	0.495255	0.645548	NOT_DGE	UpReg									geneM0
Anapc11		-0.289214	0.0535995	0.152423	NOT_DGE	DownReg
Anapc13	ANAPC13	-0.28133	0.0128559	0.0626298	NOT_DGE	DownReg									geneM0
Anapc15	ANAPC15	-0.138314	0.0275093	0.0997488	NOT_DGE	DownReg			ASD.DGE_down				SCZ.DGE_down																															geneM4
Anapc16	ANAPC16	-0.172827	8.58823e-06	0.000688015	NOT_DGE	DownReg																										geneM24
Anapc2	ANAPC2	-0.16166	0.00875115	0.0496055	NOT_DGE	DownReg									geneM0
Anapc4	ANAPC4	0.0670018	0.0715777	0.182686	NOT_DGE	UpReg																																										geneM8
Anapc5	ANAPC5	-0.039736	0.563826	0.703745	NOT_DGE	DownReg																					geneM2
Anapc7	ANAPC7	-0.0277525	0.579736	0.715483	NOT_DGE	DownReg			ASD.DGE_down				SCZ.DGE_down																	geneM22
Ang	ANG	0.239271	0.00779789	0.0460916	NOT_DGE	UpReg									geneM0
Angel1	ANGEL1	-0.218198	0.00274719	0.0242377	NOT_DGE	DownReg										geneM1
Angel2	ANGEL2	-0.11844	0.0955443	0.219101	NOT_DGE	DownReg																																					geneM34
Angpt1	ANGPT1	0.118476	0.576868	0.713582	NOT_DGE	UpReg																																geneM3
Angptl4	ANGPTL4	-0.132496	0.386873	0.549958	NOT_DGE	DownReg						BD.DGE_up		SCZ.DGE_up																															geneM5
Angptl6	ANGPTL6	0.013041	0.873839	0.921661	NOT_DGE	UpReg										geneM1
Ank	ANKH	0.203896	0.0102189	0.0540849	NOT_DGE	UpReg										geneM1
Ank1	ANK1	-0.141299	0.00185679	0.0189099	NOT_DGE	DownReg			ASD.DGE_down				SCZ.DGE_down			geneM1
Ank2	ANK2	0.10232	0.0014732	0.0163664	NOT_DGE	UpReg	ASD_SC	ASD								geneM1
Ank3	ANK3	-0.0578421	0.475449	0.629444	NOT_DGE	DownReg		ASD	ASD.DGE_down				SCZ.DGE_down														geneM2
Ankdd1b		0.00523338	0.955028	0.972225	NOT_DGE	UpReg
Ankfy1	ANKFY1	0.0324293	0.752288	0.840797	NOT_DGE	UpReg																															geneM29
Ankhd1	ANKHD1	-0.111173	0.149207	0.292797	NOT_DGE	DownReg																						geneM20
Ankhd1	ANKHD1-EIF4EBP3	-0.111173	0.149207	0.292797	NOT_DGE	DownReg				ASD.DGE_up					geneM0
Ankib1	ANKIB1	0.292533	0.0100903	0.0535905	NOT_DGE	UpReg																					geneM2
Ankle2	ANKLE2	-0.0104406	0.899874	0.937922	NOT_DGE	DownReg									geneM0
Ankmy2	ANKMY2	0.0273729	0.604466	0.735035	NOT_DGE	UpReg						BD.DGE_up																																geneM4
Ankra2	ANKRA2	0.085692	0.34292	0.508741	NOT_DGE	UpReg																																						geneM4
Ankrd10	ANKRD10	0.0840345	0.477265	0.631192	NOT_DGE	UpReg									geneM0
Ankrd11	ANKRD11	-0.173507	0.166179	0.315022	NOT_DGE	DownReg	ASD_SC	ASD							geneM0
Ankrd12	ANKRD12	-0.164357	0.163132	0.310932	NOT_DGE	DownReg												geneM11
Ankrd13a	ANKRD13A	-0.00400321	0.935901	0.959858	NOT_DGE	DownReg																					geneM2
Ankrd13b	ANKRD13B	-0.0941349	0.211095	0.369039	NOT_DGE	DownReg									geneM0
Ankrd13c	ANKRD13C	0.0900276	0.190076	0.344805	NOT_DGE	UpReg																														geneM28
Ankrd13d	ANKRD13D	-0.0785522	0.0611807	0.165227	NOT_DGE	DownReg													geneM12
Ankrd16	ANKRD16	-0.0208418	0.832669	0.896525	NOT_DGE	DownReg						BD.DGE_up																																geneM4
Ankrd17	ANKRD17	-0.0639688	0.36231	0.527178	NOT_DGE	DownReg									geneM0
Ankrd24	ANKRD24	-0.127535	0.0136224	0.0647281	NOT_DGE	DownReg													geneM12
Ankrd26	ANKRD62	0.0210602	0.663689	0.780522	NOT_DGE	UpReg									geneM0
Ankrd27	ANKRD27	0.108536	0.170721	0.320527	NOT_DGE	UpReg									geneM0
Ankrd28	ANKRD28	0.126806	0.0582449	0.16064	NOT_DGE	UpReg							SCZ.DGE_down														geneM2
Ankrd29	ANKRD29	0.0205631	0.733508	0.829004	NOT_DGE	UpReg										geneM1
Ankrd34b	ANKRD34B	0.16911	0.0975208	0.221749	NOT_DGE	UpReg										geneM1
Ankrd34c	ANKRD34C	0.295956	0.00247557	0.0227852	NOT_DGE	UpReg										geneM1
Ankrd35	ANKRD35	-0.0128181	0.83051	0.895489	NOT_DGE	DownReg								SCZ.DGE_up																								geneM3
Ankrd37	ANKRD37	0.0191199	0.749649	0.83939	NOT_DGE	UpReg									geneM0
Ankrd39	ANKRD39	0.0681222	0.0857614	0.205267	NOT_DGE	UpReg										geneM1
Ankrd40	ANKRD40	0.216103	0.0111501	0.0570514	NOT_DGE	UpReg							SCZ.DGE_down														geneM2
Ankrd42	ANKRD42	0.0751619	0.143673	0.285537	NOT_DGE	UpReg								SCZ.DGE_up		geneM1
Ankrd44	ANKRD44	-0.0357738	0.525516	0.671748	NOT_DGE	DownReg					BD.DGE_down		SCZ.DGE_down												geneM18
Ankrd45	ANKRD45	0.407295	0.035949	0.118576	NOT_DGE	UpReg								SCZ.DGE_up																								geneM3
Ankrd46	ANKRD46	0.0444523	0.135914	0.275995	NOT_DGE	UpReg																	geneM16
Ankrd49	ANKRD49	0.0241816	0.577723	0.714318	NOT_DGE	UpReg									geneM0
Ankrd50	ANKRD50	0.0454648	0.465896	0.621586	NOT_DGE	UpReg																			geneM18
Ankrd52	ANKRD52	0.276171	0.0436266	0.134366	NOT_DGE	UpReg										geneM1
Ankrd54	ANKRD54	0.00566	0.962586	0.977494	NOT_DGE	UpReg									geneM0
Ankrd55	ANKRD55	-0.186049	0.0772182	0.191921	NOT_DGE	DownReg																									geneM23
Ankrd6	ANKRD6	0.133516	0.171088	0.321026	NOT_DGE	UpReg				ASD.DGE_up				SCZ.DGE_up									geneM16
Ankrd9	ANKRD9	-0.123441	0.0907319	0.212036	NOT_DGE	DownReg									geneM0
Anks1	ANKS1A	0.0861797	0.287879	0.452603	NOT_DGE	UpReg							SCZ.DGE_down		geneM0
Anks1b	ANKS1B	0.360121	0.0277628	0.100467	NOT_DGE	UpReg		ASD								geneM1
Anks3	ANKS3	0.00583315	0.928193	0.956079	NOT_DGE	UpReg													geneM12
Anks6	ANKS6	0.0209341	0.430046	0.589905	NOT_DGE	UpReg			ASD.DGE_down						geneM0
Ankzf1	ANKZF1	-0.0525792	0.614839	0.743771	NOT_DGE	DownReg																																										geneM8
Anln	ANLN	0.201466	0.0916455	0.213269	NOT_DGE	UpReg					BD.DGE_down		SCZ.DGE_down														geneM2
Ano10	ANO10	-0.162465	0.000221584	0.00498857	NOT_DGE	DownReg																																						geneM4
Ano4	ANO4	-0.0107338	0.742804	0.835482	NOT_DGE	DownReg																					geneM2
Ano6	ANO6	0.00907409	0.863726	0.914928	NOT_DGE	UpReg																																							geneM5
Ano8	ANO8	-0.0547442	0.373176	0.536725	NOT_DGE	DownReg																																geneM3
Anp32a	ANP32D	-0.103797	0.0239801	0.0913254	NOT_DGE	DownReg
Anp32a	ANP32A	-0.103797	0.0239801	0.0913254	NOT_DGE	DownReg									geneM0
Anp32b	ANP32B	-0.221613	0.026393	0.0971689	NOT_DGE	DownReg																					geneM2
Anp32e	ANP32E	0.198907	0.0165873	0.0731084	NOT_DGE	UpReg								SCZ.DGE_up																														geneM4
Anpep	ANPEP	0.0707091	0.662774	0.779878	NOT_DGE	UpReg									geneM0
Antxr1	ANTXR1	-0.0599162	0.521141	0.667699	NOT_DGE	DownReg																																geneM3
Anxa2	ANXA2	-0.208065	0.123439	0.2588	NOT_DGE	DownReg				ASD.DGE_up				SCZ.DGE_up																															geneM5
Anxa3	ANXA3	0.0210716	0.877397	0.924647	NOT_DGE	UpReg									geneM0
Anxa4	ANXA4	0.0128188	0.884627	0.928427	NOT_DGE	UpReg									geneM0
Anxa5	ANXA5	-0.281472	0.0444254	0.136068	NOT_DGE	DownReg																																							geneM5
Anxa6	ANXA6	-0.255057	0.00312202	0.0260323	NOT_DGE	DownReg			ASD.DGE_down																																								geneM9
Anxa7	ANXA7	0.0130003	0.8371	0.899773	NOT_DGE	UpReg						BD.DGE_up																																geneM4
Anxa9	ANXA9	-0.232538	0.0620356	0.166581	NOT_DGE	DownReg																					geneM2
Aoc2	AOC2	0.129306	0.293464	0.45847	NOT_DGE	UpReg								SCZ.DGE_up			geneM10
Aox1	AOX1	0.0216876	0.789239	0.868766	NOT_DGE	UpReg									geneM0
Ap1ar	AP1AR	0.328788	0.0352452	0.11733	NOT_DGE	UpReg										geneM1
Ap1b1	AP1B1	-0.0878688	0.0219823	0.0865951	NOT_DGE	DownReg									geneM0
Ap1g1	AP1G1	0.269504	0.000464113	0.00782961	NOT_DGE	UpReg																															geneM29
Ap1g2	AP1G2	-0.196286	0.0119862	0.0597438	NOT_DGE	DownReg						BD.DGE_up																																				geneM8
Ap1m1	AP1M1	-0.11045	0.110895	0.241638	NOT_DGE	DownReg						BD.DGE_up																																			geneM7
Ap1s1	AP1S1	-0.144375	0.0704037	0.180936	NOT_DGE	DownReg																																											geneM9
Ap1s2	AP1S2	-0.126059	0.377668	0.540132	NOT_DGE	DownReg		ASD					SCZ.DGE_down																		geneM23
Ap1s3	AP1S3	0.00121718	0.982749	0.990614	NOT_DGE	UpReg									geneM0
Ap2a1	AP2A1	-0.107212	0.103653	0.231107	NOT_DGE	DownReg																																									geneM7
Ap2a2	AP2A2	0.0552957	0.0516572	0.148998	NOT_DGE	UpReg																																									geneM7
Ap2b1	AP2B1	0.0646879	0.0102853	0.0543311	NOT_DGE	UpReg																																									geneM7
Ap2m1	AP2M1	-0.0143584	0.666001	0.782301	NOT_DGE	DownReg																																											geneM9
Ap2s1	AP2S1	-0.222965	0.0864813	0.205955	NOT_DGE	DownReg										geneM1
Ap3b1	AP3B1	0.0368035	0.541066	0.685101	NOT_DGE	UpReg																															geneM29
Ap3b2	AP3B2	-0.00798518	0.851718	0.907589	NOT_DGE	DownReg										geneM1
Ap3d1	AP3D1	-0.0159052	0.696839	0.804533	NOT_DGE	DownReg									geneM0
Ap3m1	AP3M1	0.13053	0.077105	0.191921	NOT_DGE	UpReg																																									geneM7
Ap3m2	AP3M2	0.0754715	0.0300842	0.105865	NOT_DGE	UpReg																																											geneM9
Ap3s1	AP3S1	0.193026	0.000633277	0.00961951	NOT_DGE	UpReg										geneM1
Ap3s2	AP3S2	-0.121057	0.00370617	0.0290798	NOT_DGE	DownReg																					geneM2
Ap4e1	AP4E1	0.0424067	0.375026	0.537865	NOT_DGE	UpReg																					geneM2
Ap4m1	AP4M1	-0.0741891	0.0831465	0.20123	NOT_DGE	DownReg																								geneM22
Ap4s1	AP4S1	0.0321841	0.355129	0.52012	NOT_DGE	UpReg							SCZ.DGE_down			geneM1
Ap5b1	AP5B1	0.0301844	0.720125	0.820493	NOT_DGE	UpReg									geneM0
Ap5m1	AP5M1	0.265982	0.00413488	0.0308963	NOT_DGE	UpReg																																									geneM7
Ap5s1	AP5S1	-0.230284	0.0618569	0.166311	NOT_DGE	DownReg							SCZ.DGE_down																															geneM4
Ap5z1	AP5Z1	0.118822	0.161005	0.308384	NOT_DGE	UpReg									geneM0
Apaf1	APAF1	0.181505	0.343804	0.50953	NOT_DGE	UpReg									geneM0
Apba1	APBA1	0.2308	0.0268444	0.0980689	NOT_DGE	UpReg									geneM0
Apba2	APBA2	0.02341	0.796816	0.874052	NOT_DGE	UpReg	ASD_SC	ASD					SCZ.DGE_down																																				geneM9
Apba3	APBA3	-0.0136421	0.808333	0.880911	NOT_DGE	DownReg											geneM10
Apbb1	APBB1	-0.106939	0.275872	0.43957	NOT_DGE	DownReg																					geneM2
Apbb1ip	APBB1IP	-0.0345216	0.730049	0.826765	NOT_DGE	DownReg							SCZ.DGE_down																																	geneM6
Apbb2	APBB2	0.0799836	0.271935	0.435315	NOT_DGE	UpReg							SCZ.DGE_down														geneM2
Apc	APC	0.27175	0.000737803	0.0104976	NOT_DGE	UpReg		ASD					SCZ.DGE_down												geneM18
Apc2	APC2	-0.0508332	0.404676	0.565902	NOT_DGE	DownReg									geneM0
Apeh	APEH	-0.139555	0.15418	0.299839	NOT_DGE	DownReg																								geneM22
Apex1	APEX1	-0.186183	0.00614096	0.0395441	NOT_DGE	DownReg																																									geneM7
Apex2	APEX2	0.0983207	0.00375231	0.029246	NOT_DGE	UpReg									geneM0
Aph1a	APH1A	0.102019	0.258775	0.421825	NOT_DGE	UpReg	ASD_SC	ASD																														geneM3
Aph1b	APH1B	0.176656	0.228319	0.389097	NOT_DGE	UpReg																																						geneM4
Aph1c	APH1B	-0.0814909	0.455877	0.612199	NOT_DGE	DownReg																																						geneM4
Api5	API5	0.0725361	0.0228383	0.0883416	NOT_DGE	UpReg								SCZ.DGE_up																																	geneM7
Apip	APIP	-0.279127	0.0489099	0.143786	NOT_DGE	DownReg																					geneM2
Apitd1		-0.204208	0.0170257	0.0742175	NOT_DGE	DownReg
Aplf	APLF	-0.09629	0.00126186	0.014931	NOT_DGE	DownReg					BD.DGE_down		SCZ.DGE_down														geneM2
Apln	APLN	-0.042853	0.725248	0.823527	NOT_DGE	DownReg																																geneM3
Aplp1	APLP1	-0.0910382	0.0730312	0.185302	NOT_DGE	DownReg																					geneM2
Aplp2	APLP2	0.136718	2.08127e-06	0.000297458	NOT_DGE	UpReg																																											geneM9
Apmap	APMAP	0.0951739	0.25562	0.418287	NOT_DGE	UpReg								SCZ.DGE_up																																			geneM9
Apoa1bp		-0.30739	0.013896	0.0654414	NOT_DGE	DownReg
Apoa2	APOA2	-0.426004	0.00936915	0.0513818	NOT_DGE	DownReg
Apobec1	APOBEC1	-0.120827	0.239034	0.400965	NOT_DGE	DownReg
Apobec3	APOBEC3H	-0.265048	0.159817	0.306803	NOT_DGE	DownReg
Apod	APOD	-0.258459	0.174051	0.324762	NOT_DGE	DownReg																															geneM29
Apoe	APOE	-0.184269	0.0055631	0.0373615	NOT_DGE	DownReg				ASD.DGE_up				SCZ.DGE_up																								geneM3
Apold1	APOLD1	-0.229245	0.00386442	0.0297191	NOT_DGE	DownReg																																							geneM5
Apoo	APOO	-0.115325	0.0862949	0.205788	NOT_DGE	DownReg									geneM0
Apool	APOOL	-0.173768	0.0544144	0.153523	NOT_DGE	DownReg									geneM0
Apopt1	COA8	-0.260819	0.00148681	0.0164538	NOT_DGE	DownReg
App	APP	0.203154	0.0493227	0.144659	NOT_DGE	UpReg		ASD								geneM1
Appbp2	APPBP2	0.228674	0.0109984	0.0567333	NOT_DGE	UpReg			ASD.DGE_down				SCZ.DGE_down														geneM2
Appl1	APPL1	0.214016	0.00336839	0.027273	NOT_DGE	UpReg																					geneM2
Appl2	APPL2	0.259851	0.152063	0.297094	NOT_DGE	UpReg																																geneM3
Aprt	APRT	-0.254861	0.0040122	0.0303781	NOT_DGE	DownReg																																						geneM4
Aptx	APTX	-0.000498434	0.988922	0.993845	NOT_DGE	DownReg									geneM0
Aqp11	AQP11	0.0926461	0.0139942	0.0656072	NOT_DGE	UpReg									geneM0
Aqp4	AQP4	0.184092	0.525907	0.67195	NOT_DGE	UpReg								SCZ.DGE_up																								geneM3
Aqr	AQR	0.102723	0.251892	0.414765	NOT_DGE	UpReg																																geneM3
Ar	AR	-0.0598716	0.413033	0.573539	NOT_DGE	DownReg	ASD_SC	ASD							geneM0
Araf	ARAF	0.1265	0.135907	0.275995	NOT_DGE	UpReg																																geneM3
Arap1	ARAP1	-0.212568	0.00592782	0.0388469	NOT_DGE	DownReg																					geneM2
Arap2	ARAP2	0.0658691	0.0111465	0.0570514	NOT_DGE	UpReg																					geneM2
Arap3	ARAP3	0.134438	0.0782641	0.193568	NOT_DGE	UpReg						BD.DGE_up																								geneM28
Arcn1	ARCN1	0.221933	0.0127251	0.0621573	NOT_DGE	UpReg																															geneM29
Arel1	AREL1	0.195409	0.0897243	0.210532	NOT_DGE	UpReg										geneM1
Arf1	ARF1	0.0904317	0.0336638	0.113763	NOT_DGE	UpReg						BD.DGE_up		SCZ.DGE_up																																	geneM7
Arf3	ARF3	0.0924183	0.128611	0.265487	NOT_DGE	UpReg									geneM0
Arf4	ARF4	0.203445	0.227024	0.387918	NOT_DGE	UpReg							SCZ.DGE_down																																		geneM7
Arf5	ARF5	-0.0805092	0.00932041	0.0512513	NOT_DGE	DownReg			ASD.DGE_down																																			geneM4
Arf6	ARF6	-0.0397036	0.778904	0.861236	NOT_DGE	DownReg									geneM0
Arfgap1	ARFGAP1	-0.0284996	0.660868	0.7785	NOT_DGE	DownReg															geneM14
Arfgap2	ARFGAP2	-0.157099	0.000525541	0.00853753	NOT_DGE	DownReg																				geneM19
Arfgap3	ARFGAP3	0.297137	6.03747e-07	0.000137137	NOT_DGE	UpReg								SCZ.DGE_up														geneM20
Arfgef1	ARFGEF1	0.236262	0.00233422	0.0218801	NOT_DGE	UpReg																								geneM22
Arfgef2	ARFGEF2	0.0955303	0.0826454	0.20045	NOT_DGE	UpReg			ASD.DGE_down																																								geneM9
Arfgef3	ARFGEF3	-0.0119272	0.857174	0.91111	NOT_DGE	DownReg
Arfip1	ARFIP1	-0.156485	0.000259414	0.00550875	NOT_DGE	DownReg																																geneM3
Arfip2	ARFIP2	0.100706	0.0336421	0.11372	NOT_DGE	UpReg																																											geneM9
Arfrp1	ARFRP1	0.0154364	0.85249	0.907842	NOT_DGE	UpReg															geneM14
Arg2	ARG2	0.0999617	0.392725	0.55523	NOT_DGE	UpReg											geneM10
Arglu1	ARGLU1	0.0546859	0.378513	0.540915	NOT_DGE	UpReg																																										geneM8
Arhgap1	ARHGAP1	-0.00472955	0.611542	0.740911	NOT_DGE	DownReg																															geneM29
Arhgap10	ARHGAP10	0.0177844	0.694078	0.802911	NOT_DGE	UpReg										geneM1
Arhgap12	ARHGAP12	-0.0397868	0.721598	0.821426	NOT_DGE	DownReg																																geneM3
Arhgap15	ARHGAP15	0.2379	0.0241207	0.0915048	NOT_DGE	UpReg		ASD																																						geneM6
Arhgap17	ARHGAP17	-0.0153778	0.811767	0.882762	NOT_DGE	DownReg																					geneM2
Arhgap18	ARHGAP18	0.0842817	0.47939	0.632494	NOT_DGE	UpReg				ASD.DGE_up					geneM0
Arhgap19	ARHGAP19	0.0913968	0.163401	0.311254	NOT_DGE	UpReg																																geneM3
Arhgap19	ARHGAP19-SLIT1	0.0913968	0.163401	0.311254	NOT_DGE	UpReg									geneM0
Arhgap20	ARHGAP20	0.292522	0.00179861	0.01848	NOT_DGE	UpReg					BD.DGE_down		SCZ.DGE_down														geneM2
Arhgap21	ARHGAP21	0.24917	0.019507	0.080313	NOT_DGE	UpReg																					geneM2
Arhgap22	ARHGAP22	0.0795368	0.439825	0.598352	NOT_DGE	UpReg							SCZ.DGE_down														geneM2
Arhgap23	ARHGAP23	0.156435	0.00480524	0.0343	NOT_DGE	UpReg																					geneM2
Arhgap24	ARHGAP24	0.0420675	0.350663	0.516254	NOT_DGE	UpReg		ASD								geneM1
Arhgap25	ARHGAP25	-0.055654	0.623717	0.750584	NOT_DGE	DownReg																																								geneM6
Arhgap26	ARHGAP26	0.172595	0.188412	0.342911	NOT_DGE	UpReg										geneM1
Arhgap27	ARHGAP27	-0.132841	0.134709	0.274335	NOT_DGE	DownReg							SCZ.DGE_down																																	geneM6
Arhgap29	ARHGAP29	0.288173	1.49716e-05	0.00093322	NOT_DGE	UpReg																																							geneM5
Arhgap31	ARHGAP31	0.0917697	0.123946	0.259564	NOT_DGE	UpReg																																geneM3
Arhgap33	ARHGAP33	-0.0666066	0.451057	0.608553	NOT_DGE	DownReg		ASD																geneM17
Arhgap35	ARHGAP35	0.191686	0.00764289	0.0454015	NOT_DGE	UpReg									geneM0
Arhgap39	ARHGAP39	0.0557406	0.332228	0.497405	NOT_DGE	UpReg						BD.DGE_up		SCZ.DGE_up	geneM0
Arhgap4	ARHGAP4	0.0509343	0.157342	0.303885	NOT_DGE	UpReg																																								geneM6
Arhgap42	ARHGAP42	0.177518	0.0038228	0.0295959	NOT_DGE	UpReg				ASD.DGE_up																												geneM3
Arhgap44	ARHGAP44	0.168155	0.0151784	0.0690027	NOT_DGE	UpReg			ASD.DGE_down							geneM1
Arhgap45	ARHGAP45	0.180604	0.25628	0.418846	NOT_DGE	UpReg
Arhgap5	ARHGAP5	0.190937	0.0302944	0.106243	NOT_DGE	UpReg				ASD.DGE_up																												geneM3
Arhgdia	ARHGDIA	-0.231558	0.0197164	0.0809792	NOT_DGE	DownReg																																									geneM7
Arhgdib	ARHGDIB	-0.313891	0.226215	0.387067	NOT_DGE	DownReg																																								geneM6
Arhgdig	ARHGDIG	-0.239921	0.0241111	0.0914955	NOT_DGE	DownReg													geneM12
Arhgef1	ARHGEF1	-0.0752045	0.184635	0.337679	NOT_DGE	DownReg																					geneM2
Arhgef10	ARHGEF10	0.154582	0.146467	0.289474	NOT_DGE	UpReg					BD.DGE_down				geneM0
Arhgef10l	ARHGEF10L	0.14364	0.118761	0.252193	NOT_DGE	UpReg																																geneM3
Arhgef11	ARHGEF11	0.10782	0.00178364	0.0184239	NOT_DGE	UpReg										geneM1
Arhgef12	ARHGEF12	0.16224	0.0698167	0.179917	NOT_DGE	UpReg																																geneM3
Arhgef15	ARHGEF15	0.0940363	0.0298876	0.105515	NOT_DGE	UpReg																												geneM26
Arhgef17	ARHGEF17	0.19882	0.000217801	0.00492959	NOT_DGE	UpReg								SCZ.DGE_up		geneM1
Arhgef18	ARHGEF18	0.107492	0.00541726	0.0368096	NOT_DGE	UpReg																					geneM2
Arhgef19	ARHGEF19	0.0843097	0.365323	0.530045	NOT_DGE	UpReg									geneM0
Arhgef2	ARHGEF2	0.148654	0.0181019	0.0771636	NOT_DGE	UpReg							SCZ.DGE_down														geneM2
Arhgef25	ARHGEF25	0.174354	0.117907	0.251178	NOT_DGE	UpReg										geneM1
Arhgef26	ARHGEF26	0.00608114	0.960863	0.976169	NOT_DGE	UpReg				ASD.DGE_up				SCZ.DGE_up																								geneM3
Arhgef28	ARHGEF28	0.0187371	0.815294	0.885009	NOT_DGE	UpReg				ASD.DGE_up				SCZ.DGE_up		geneM1
Arhgef4	SMIM39	0.0284553	0.588152	0.722202	NOT_DGE	UpReg
Arhgef4	ARHGEF4	0.0284553	0.588152	0.722202	NOT_DGE	UpReg													geneM12
Arhgef40	ARHGEF40	-0.107934	0.146501	0.289481	NOT_DGE	DownReg				ASD.DGE_up																												geneM3
Arhgef6	ARHGEF6	0.109489	0.343378	0.509128	NOT_DGE	UpReg				ASD.DGE_up																												geneM3
Arhgef7	ARHGEF7	0.0366942	0.234791	0.396078	NOT_DGE	UpReg										geneM1
Arhgef9	ARHGEF9	0.331334	0.0318776	0.109977	NOT_DGE	UpReg		ASD	ASD.DGE_down							geneM1
Arid1a	ARID1A	-0.114056	0.0245425	0.0924431	NOT_DGE	DownReg																															geneM29
Arid1b	ARID1B	0.0447175	0.297458	0.462437	NOT_DGE	UpReg	ASD_SC	ASD							geneM0
Arid2	ARID2	-0.0425606	0.453274	0.610702	NOT_DGE	DownReg																															geneM29
Arid3a	ARID3A	0.00466513	0.962986	0.977666	NOT_DGE	UpReg									geneM0
Arid3b	ARID3B	-0.00275341	0.952511	0.970595	NOT_DGE	DownReg							SCZ.DGE_down		geneM0
Arid4a	ARID4A	-0.0830192	0.272484	0.435865	NOT_DGE	DownReg												geneM11
Arid4b	ARID4B	-0.101078	0.0608501	0.164789	NOT_DGE	DownReg												geneM11
Arid5a	ARID5A	-0.249617	0.0369497	0.120823	NOT_DGE	DownReg																																							geneM5
Arid5b	ARID5B	0.00732143	0.889906	0.931655	NOT_DGE	UpReg								SCZ.DGE_up																															geneM5
Arih1	ARIH1	0.164385	0.0103236	0.0544654	NOT_DGE	UpReg																															geneM29
Arih2	ARIH2	0.115992	0.0345618	0.115813	NOT_DGE	UpReg			ASD.DGE_down				SCZ.DGE_down																																				geneM9
Arl1	ARL1	0.235354	0.0187041	0.078322	NOT_DGE	UpReg										geneM1
Arl10	ARL10	0.225375	0.158111	0.304631	NOT_DGE	UpReg									geneM0
Arl13b	ARL13B	0.00770447	0.900546	0.93834	NOT_DGE	UpReg																																geneM3
Arl14ep	ARL14EP	0.098993	0.396079	0.558427	NOT_DGE	UpReg														geneM13
Arl15	ARL15	0.0995517	0.313262	0.478757	NOT_DGE	UpReg								SCZ.DGE_up	geneM0
Arl16	ARL16	0.0278546	0.669432	0.784881	NOT_DGE	UpReg									geneM0
Arl2	ARL2	-0.332248	0.00940035	0.0514069	NOT_DGE	DownReg						BD.DGE_up		SCZ.DGE_up													geneM2
Arl2bp	ARL2BP	0.106015	0.255642	0.418287	NOT_DGE	UpReg									geneM0
Arl3	ARL3	-0.081417	0.0224245	0.0874995	NOT_DGE	DownReg									geneM0
Arl4a	ARL4A	0.144993	0.0706655	0.181333	NOT_DGE	UpReg								SCZ.DGE_up						geneM13
Arl4c	ARL4C	0.0938856	0.047857	0.142249	NOT_DGE	UpReg																									geneM23
Arl5a	ARL5A	0.171699	0.0070295	0.0431331	NOT_DGE	UpReg									geneM0
Arl5b	ARL5B	0.265101	0.000177326	0.00440797	NOT_DGE	UpReg																																							geneM5
Arl5c	ARL5C	-0.120748	0.0523095	0.150108	NOT_DGE	DownReg									geneM0
Arl6	ARL6	0.0415971	0.344053	0.509649	NOT_DGE	UpReg										geneM1
Arl6ip1	ARL6IP1	-0.073251	0.0145619	0.0674044	NOT_DGE	DownReg								SCZ.DGE_up						geneM13
Arl6ip4	ARL6IP4	-0.186727	0.0141994	0.066157	NOT_DGE	DownReg													geneM12
Arl6ip5	ARL6IP5	0.106278	0.00295657	0.025193	NOT_DGE	UpReg																																									geneM7
Arl6ip6	ARL6IP6	0.141175	0.373417	0.53695	NOT_DGE	UpReg																																geneM3
Arl8a	ARL8A	0.0938146	0.122189	0.256984	NOT_DGE	UpReg																					geneM2
Arl8b	ARL8B	-0.00405032	0.619466	0.747113	NOT_DGE	DownReg										geneM1
Armc1	ARMC1	0.18713	0.00214246	0.0207398	NOT_DGE	UpReg																					geneM2
Armc10	ARMC10	0.17728	0.0560798	0.156654	NOT_DGE	UpReg																					geneM2
Armc2	ARMC2	0.186844	7.17298e-05	0.00255617	NOT_DGE	UpReg																																										geneM8
Armc5	ARMC5	-0.135989	0.132565	0.271096	NOT_DGE	DownReg									geneM0
Armc6	ARMC6	-0.0224626	0.717804	0.818656	NOT_DGE	DownReg									geneM0
Armc7	ARMC7	-0.0335904	0.576966	0.713632	NOT_DGE	DownReg									geneM0
Armc8	ARMC8	0.268255	0.0265845	0.0975485	NOT_DGE	UpReg										geneM1
Armc9	ARMC9	0.0769627	0.0590046	0.161789	NOT_DGE	UpReg										geneM1
Armcx1	ARMCX1	0.232847	0.110371	0.24105	NOT_DGE	UpReg																	geneM16
Armcx2	ARMCX2	0.200445	0.0354609	0.117728	NOT_DGE	UpReg																										geneM24
Armcx3	ARMCX3	0.134997	0.0134104	0.0640797	NOT_DGE	UpReg							SCZ.DGE_down																																				geneM9
Armcx4	ARMCX4	0.0311145	0.758615	0.84601	NOT_DGE	UpReg																																											geneM9
Armcx5	ARMCX5	0.221598	0.0177475	0.0762403	NOT_DGE	UpReg			ASD.DGE_down																																			geneM4
Armcx6	ARMCX6	-0.316491	0.132338	0.270721	NOT_DGE	DownReg									geneM0
Armt1	ARMT1	0.00621073	0.809198	0.881703	NOT_DGE	UpReg
Arnt	ARNT	0.122214	0.3112	0.476579	NOT_DGE	UpReg									geneM0
Arntl	ARNTL	0.322577	0.0136328	0.0647291	NOT_DGE	UpReg										geneM1
Arntl2	ARNTL2	0.150803	0.0211926	0.0846108	NOT_DGE	UpReg							SCZ.DGE_down		geneM0
Arpc1a	ARPC1A	-0.0452376	0.455733	0.612136	NOT_DGE	DownReg									geneM0
Arpc1b	ARPC1B	-0.355499	0.00939576	0.0514069	NOT_DGE	DownReg																																								geneM6
Arpc2	ARPC2	0.0231964	0.536649	0.681391	NOT_DGE	UpReg									geneM0
Arpc3	ARPC3	-0.0918615	0.0747873	0.188151	NOT_DGE	DownReg							SCZ.DGE_down		geneM0
Arpc4	ARPC4	-0.175671	0.0759745	0.190273	NOT_DGE	DownReg									geneM0
Arpc5	ARPC5	0.108922	0.302477	0.467839	NOT_DGE	UpReg							SCZ.DGE_down												geneM18
Arpc5l	ARPC5L	-0.154848	0.000357167	0.00676066	NOT_DGE	DownReg																																											geneM9
Arpin	ARPIN	-0.117117	0.0371283	0.12122	NOT_DGE	DownReg
Arpin	ARPIN-AP3S2	-0.117117	0.0371283	0.12122	NOT_DGE	DownReg
Arpp19		0.231432	0.138954	0.280509	NOT_DGE	UpReg
Arrb1	ARRB1	0.0573315	0.0835516	0.201793	NOT_DGE	UpReg									geneM0
Arrb2	ARRB2	0.0553827	0.675331	0.788961	NOT_DGE	UpReg									geneM0
Arrdc1	ARRDC1	-0.23615	5.45225e-06	0.000559296	NOT_DGE	DownReg													geneM12
Arrdc2	ARRDC2	0.176731	3.57805e-06	0.000428832	NOT_DGE	UpReg																					geneM2
Arrdc3	ARRDC3	0.220743	2.73592e-05	0.0013671	NOT_DGE	UpReg				ASD.DGE_up		BD.DGE_up		SCZ.DGE_up																															geneM5
Arrdc4	ARRDC4	-0.014425	0.91362	0.946788	NOT_DGE	DownReg									geneM0
Arsa	ARSA	0.0607701	0.688237	0.797956	NOT_DGE	UpReg																					geneM2
arsb		0.208698	0.068646	0.1782	NOT_DGE	UpReg
Arsg	ARSG	-0.0671042	0.475547	0.629444	NOT_DGE	DownReg																																						geneM4
Arsk	ARSK	-0.0069505	0.976822	0.986673	NOT_DGE	DownReg											geneM10
Art3	ART3	-0.244842	0.0943422	0.217279	NOT_DGE	DownReg										geneM1
Arv1	ARV1	-0.156892	0.0317491	0.109863	NOT_DGE	DownReg																																									geneM7
Arvcf	ARVCF	0.0352604	0.712996	0.815231	NOT_DGE	UpReg									geneM0
Arx	ARX	0.116168	0.24255	0.40494	NOT_DGE	UpReg	ASD_SC	ASD																							geneM23
Arxes1	SPCS3	-0.0109017	0.925357	0.954188	NOT_DGE	DownReg							SCZ.DGE_down			geneM1
Arxes2	SPCS3	0.0756291	0.4266	0.587028	NOT_DGE	UpReg							SCZ.DGE_down			geneM1
As3mt	AS3MT	-0.0179859	0.918153	0.949584	NOT_DGE	DownReg									geneM0
Asah1	ASAH1	0.398696	0.0711788	0.18214	NOT_DGE	UpReg									geneM0
Asah2	ASAH2	0.057823	0.449023	0.60657	NOT_DGE	UpReg						BD.DGE_up			geneM0
Asah2	ASAH2B	0.057823	0.449023	0.60657	NOT_DGE	UpReg										geneM1
Asap1	ASAP1	0.210939	0.0584358	0.160956	NOT_DGE	UpReg																																									geneM7
Asb1	ASB1	0.076622	0.200767	0.35688	NOT_DGE	UpReg																					geneM2
Asb11	ASB11	0.062406	0.660307	0.778127	NOT_DGE	UpReg
Asb13	ASB13	0.0637772	0.322642	0.48792	NOT_DGE	UpReg									geneM0
Asb16	ASB16	-0.0246937	0.635305	0.759643	NOT_DGE	DownReg									geneM0
Asb3	ASB3	0.034304	0.683694	0.794838	NOT_DGE	UpReg								SCZ.DGE_up	geneM0
Asb6	ASB6	0.0982656	0.0493524	0.144679	NOT_DGE	UpReg						BD.DGE_up			geneM0
Asb7	ASB7	0.15642	0.00380544	0.0295694	NOT_DGE	UpReg																																					geneM34
Asb8	ASB8	0.218088	0.00658632	0.0414537	NOT_DGE	UpReg			ASD.DGE_down																																			geneM4
Ascc1	ASCC1	-0.271398	0.0140322	0.0656219	NOT_DGE	DownReg																															geneM29
Ascc2	ASCC2	-0.00776166	0.860642	0.913247	NOT_DGE	DownReg																																geneM3
Ascc3	ASCC3	-0.107358	0.29388	0.459053	NOT_DGE	DownReg																																geneM3
Ascl1	ASCL1	-0.0624996	0.670991	0.78606	NOT_DGE	DownReg																																geneM3
Asf1a	ASF1A	0.238899	0.134176	0.273557	NOT_DGE	UpReg																																geneM3
Ash1l	ASH1L	0.122665	4.7428e-06	0.000505224	NOT_DGE	UpReg	ASD_SC	ASD								geneM1
Ash2l	ASH2L	-0.0224677	0.722451	0.821797	NOT_DGE	DownReg			ASD.DGE_down																																						geneM7
Asic1	ASIC1	0.00815733	0.817616	0.88657	NOT_DGE	UpReg							SCZ.DGE_down		geneM0
Asic4	ASIC4	-0.0883514	0.424893	0.585552	NOT_DGE	DownReg																									geneM23
Asl	ASL	-0.283972	0.000175209	0.00439578	NOT_DGE	DownReg																																						geneM4
Asna1	GET3	-0.171811	0.103752	0.23125	NOT_DGE	DownReg
Asns	ASNS	-0.191126	0.00679015	0.0422509	NOT_DGE	DownReg										geneM1
Asnsd1	ASNSD1	-0.194422	0.0846221	0.203323	NOT_DGE	DownReg									geneM0
Aspa	ASPA	-0.0631553	0.559793	0.700637	NOT_DGE	DownReg							SCZ.DGE_down														geneM2
Aspdh	ASPDH	-0.0401535	0.651355	0.771999	NOT_DGE	DownReg										geneM1
Asph	ASPH	0.292963	0.010573	0.0554363	NOT_DGE	UpReg								SCZ.DGE_up																								geneM3
Asphd1	ASPHD1	-0.033866	0.673691	0.787971	NOT_DGE	DownReg							SCZ.DGE_down		geneM0
Asphd2	ASPHD2	0.0648797	0.375518	0.538087	NOT_DGE	UpReg									geneM0
Aspn	ASPN	0.182899	0.332442	0.497606	NOT_DGE	UpReg					BD.DGE_down		SCZ.DGE_down																						geneM27
Aspscr1	ASPSCR1	-0.196371	3.16391e-05	0.00148168	NOT_DGE	DownReg									geneM0
Asrgl1	ASRGL1	0.0156516	0.852468	0.907842	NOT_DGE	UpReg																																geneM3
Ass1	ASS1	-0.135425	0.173415	0.324092	NOT_DGE	DownReg		ASD								geneM1
Aste1	ASTE1	0.101309	0.224077	0.384807	NOT_DGE	UpReg							SCZ.DGE_down																															geneM4
Astn1	ASTN1	0.214926	0.0374133	0.121682	NOT_DGE	UpReg																																geneM3
Astn2	ASTN2	0.00111479	0.994534	0.9971	NOT_DGE	UpReg	ASD_SC	ASD																			geneM2
Asxl1	ASXL1	0.0648751	0.253939	0.416573	NOT_DGE	UpReg									geneM0
Asxl2	ASXL2	0.092924	0.189186	0.343788	NOT_DGE	UpReg																																geneM3
Asxl3	ASXL3	0.159422	0.0464197	0.139711	NOT_DGE	UpReg	ASD_SC	ASD							geneM0
Atad1	ATAD1	0.238806	0.0151318	0.0688891	NOT_DGE	UpReg																																											geneM9
Atad2		0.0134595	0.828836	0.894063	NOT_DGE	UpReg
Atad2b	ATAD2B	0.340586	0.123974	0.25958	NOT_DGE	UpReg																																geneM3
Atad3a	ATAD3A	-0.109253	0.0318402	0.109907	NOT_DGE	DownReg						BD.DGE_up									geneM14
Atad5	ATAD5	0.0202408	0.857969	0.911422	NOT_DGE	UpReg																																						geneM4
Atat1	ATAT1	-0.0706794	0.209354	0.367207	NOT_DGE	DownReg																																									geneM7
Atcay	ATCAY	-0.0346941	0.443431	0.601138	NOT_DGE	DownReg										geneM1
Ate1	ATE1	0.105567	0.126304	0.262394	NOT_DGE	UpReg										geneM1
Atf1	ATF1	-0.0130548	0.853594	0.908443	NOT_DGE	DownReg									geneM0
Atf2	ATF2	0.27554	0.0100363	0.0534371	NOT_DGE	UpReg																		geneM17
Atf4	ATF4	-0.139745	0.029327	0.104056	NOT_DGE	DownReg																						geneM20
Atf5	ATF5	-0.247634	0.000309321	0.00615738	NOT_DGE	DownReg									geneM0
Atf6	ATF6	0.292332	0.000114136	0.00344848	NOT_DGE	UpReg																						geneM20
Atf6b	ATF6B	0.0695362	0.0526293	0.150674	NOT_DGE	UpReg									geneM0
Atf7	ATF7	-0.0342631	0.400741	0.562837	NOT_DGE	DownReg																															geneM29
Atf7ip	ATF7IP	0.124088	0.0896374	0.210406	NOT_DGE	UpReg																																geneM3
Atg10	ATG10	0.158953	0.069286	0.17913	NOT_DGE	UpReg																					geneM2
Atg101	ATG101	-0.0481839	0.528202	0.673931	NOT_DGE	DownReg
Atg12	ATG12	0.267562	0.0142652	0.0663206	NOT_DGE	UpReg									geneM0
Atg13	ATG13	0.165466	0.002184	0.021014	NOT_DGE	UpReg																					geneM2
Atg14	ATG14	0.133153	0.167438	0.316748	NOT_DGE	UpReg																																						geneM4
Atg16l1	ATG16L1	0.152905	0.0388534	0.124645	NOT_DGE	UpReg			ASD.DGE_down				SCZ.DGE_down																				geneM25
Atg16l2	ATG16L2	0.0788773	0.483614	0.635426	NOT_DGE	UpReg							SCZ.DGE_down																				geneM25
Atg2a	ATG2A	-0.0907594	0.0919327	0.213574	NOT_DGE	DownReg																																						geneM4
Atg2b	ATG2B	0.257597	0.000430543	0.00750692	NOT_DGE	UpReg			ASD.DGE_down																																								geneM9
Atg3	ATG3	-0.0412301	0.350956	0.516355	NOT_DGE	DownReg																					geneM2
Atg4a	ATG4A	0.236409	0.162179	0.309934	NOT_DGE	UpReg											geneM10
Atg4b	ATG4B	-0.0376479	0.492394	0.642978	NOT_DGE	DownReg								SCZ.DGE_up																		geneM24
Atg4c	ATG4C	0.204393	0.024854	0.093175	NOT_DGE	UpReg					BD.DGE_down		SCZ.DGE_down														geneM2
Atg4d	ATG4D	-0.0927222	0.203746	0.360452	NOT_DGE	DownReg									geneM0
Atg5	ATG5	0.0871643	0.201179	0.357401	NOT_DGE	UpReg																										geneM24
Atg7	ATG7	-0.141557	0.0522792	0.150077	NOT_DGE	DownReg		ASD								geneM1
Atg9a	ATG9A	0.0436108	0.000165746	0.00429029	NOT_DGE	UpReg										geneM1
Atg9b	ATG9B	-0.0416245	0.582864	0.717787	NOT_DGE	DownReg									geneM0
Athl1		-0.047175	0.514737	0.662027	NOT_DGE	DownReg
Atic	ATIC	-0.120224	0.0462447	0.139342	NOT_DGE	DownReg																																									geneM7
Atl1	ATL1	0.231686	0.000654008	0.0097298	NOT_DGE	UpReg										geneM1
Atl2	ATL2	0.214579	0.0330312	0.112582	NOT_DGE	UpReg														geneM13
Atl3	ATL3	0.0690036	0.486753	0.638469	NOT_DGE	UpReg																																							geneM5
Atm	ATM	0.0965478	0.109426	0.239535	NOT_DGE	UpReg					BD.DGE_down		SCZ.DGE_down														geneM2
Atmin	ATMIN	0.256703	0.002616	0.023583	NOT_DGE	UpReg							SCZ.DGE_down		geneM0
Atn1	ATN1	-0.342734	0.0918542	0.213534	NOT_DGE	DownReg																																									geneM7
Atox1	ATOX1	-0.344436	0.0138281	0.0652182	NOT_DGE	DownReg																geneM15
Atp10a	ATP10A	-0.0366674	0.513539	0.661357	NOT_DGE	DownReg	ASD_SC	ASD																										geneM26
Atp11a	ATP11A	0.221936	0.155478	0.301383	NOT_DGE	UpReg									geneM0
Atp11b	ATP11B	0.196179	0.0687165	0.178346	NOT_DGE	UpReg									geneM0
Atp11c	ATP11C	0.161652	0.386706	0.549781	NOT_DGE	UpReg																																								geneM6
Atp13a1	ATP13A1	-0.113773	0.00102842	0.0130946	NOT_DGE	DownReg																																									geneM7
Atp13a2	ATP13A2	0.0981633	0.112779	0.24448	NOT_DGE	UpReg																																									geneM7
Atp13a3	ATP13A3	0.0692963	0.190761	0.345481	NOT_DGE	UpReg																						geneM20
Atp13a4	ATP13A4	-0.16948	0.300456	0.465732	NOT_DGE	DownReg																																geneM3
Atp13a5	ATP13A5	0.162943	0.169776	0.319642	NOT_DGE	UpReg																																geneM3
Atp1a2	ATP1A2	-0.238559	0.000124914	0.00364428	NOT_DGE	DownReg																																geneM3
Atp1a3	ATP1A3	-0.0467758	0.332354	0.497534	NOT_DGE	DownReg	ASD_SC	ASD																																							geneM7
Atp1b1	ATP1B1	0.261455	0.0115149	0.058275	NOT_DGE	UpReg			ASD.DGE_down				SCZ.DGE_down			geneM1
Atp1b2	ATP1B2	0.0205466	0.854894	0.909219	NOT_DGE	UpReg								SCZ.DGE_up																								geneM3
Atp1b3	ATP1B3	-0.023355	0.522196	0.668781	NOT_DGE	DownReg																																									geneM7
Atp2a2	ATP2A2	0.280287	0.000282771	0.00583498	NOT_DGE	UpReg																																									geneM7
Atp2b1	ATP2B1	0.0780837	0.466935	0.622231	NOT_DGE	UpReg			ASD.DGE_down							geneM1
Atp2b2	ATP2B2	0.209069	0.272667	0.436037	NOT_DGE	UpReg	ASD_SC	ASD	ASD.DGE_down				SCZ.DGE_down			geneM1
Atp2b3	ATP2B3	0.14029	0.0932537	0.215368	NOT_DGE	UpReg										geneM1
Atp2b4	ATP2B4	0.130754	0.310594	0.47611	NOT_DGE	UpReg				ASD.DGE_up				SCZ.DGE_up	geneM0
Atp2c1	ATP2C1	0.278101	0.00862986	0.0491809	NOT_DGE	UpReg									geneM0
Atp4a	ATP4A	-0.275161	0.0649508	0.171726	NOT_DGE	DownReg										geneM1
Atp5a1	ATP5F1A	-0.0397709	0.39382	0.556105	NOT_DGE	DownReg
Atp5b	ATP5F1B	-0.00542496	0.922057	0.951994	NOT_DGE	DownReg
Atp5c1	ATP5F1C	-0.0339381	0.649254	0.7706	NOT_DGE	DownReg
Atp5d	ATP5F1D	-0.265547	0.083963	0.202428	NOT_DGE	DownReg
Atp5f1		0.134978	0.00185149	0.018871	NOT_DGE	UpReg
Atp5g1		-0.182116	0.284897	0.449633	NOT_DGE	DownReg
Atp5g3	ATP5MC3	-0.295461	0.00832824	0.048067	NOT_DGE	DownReg
Atp5h	ATP5PD	-0.212601	0.0132482	0.0636773	NOT_DGE	DownReg
Atp5j	ATP5PF	-0.138244	0.0122525	0.06069	NOT_DGE	DownReg
Atp5k	ATP5ME	-0.00121577	0.967859	0.981439	NOT_DGE	DownReg
Atp5l	ATP5MG	-0.158471	0.0269236	0.0981864	NOT_DGE	DownReg
Atp5l	ATP5MGL	-0.158471	0.0269236	0.0981864	NOT_DGE	DownReg
Atp5o	ATP5PO	-0.179704	0.0498885	0.14558	NOT_DGE	DownReg
Atp5s		-0.0331226	0.75981	0.846904	NOT_DGE	DownReg
Atp5sl		-0.0701618	0.0356883	0.118248	NOT_DGE	DownReg
Atp6ap1	ATP6AP1	0.0586284	1.16555e-05	0.000814607	NOT_DGE	UpReg																																									geneM7
Atp6ap1l	ATP6AP1L	-0.128187	0.510161	0.658539	NOT_DGE	DownReg									geneM0
Atp6ap2	ATP6AP2	0.1213	0.000920713	0.0121813	NOT_DGE	UpReg										geneM1
Atp6v0a1	ATP6V0A1	-0.0286925	0.29085	0.455786	NOT_DGE	DownReg																																									geneM7
Atp6v0a2	ATP6V0A2	-0.047356	0.499479	0.649364	NOT_DGE	DownReg																														geneM28
Atp6v0b	ATP6V0B	-0.227521	0.0205353	0.0830291	NOT_DGE	DownReg									geneM0
Atp6v0d1	ATP6V0D1	0.0233557	0.0151744	0.0690027	NOT_DGE	UpReg																																									geneM7
Atp6v0e	ATP6V0E1	-0.0508211	0.404718	0.565902	NOT_DGE	DownReg				ASD.DGE_up																												geneM3
Atp6v0e2	ATP6V0E2	0.0871541	0.157146	0.303646	NOT_DGE	UpReg																																						geneM4
Atp6v1a	ATP6V1A	0.120831	0.000934903	0.0123361	NOT_DGE	UpReg			ASD.DGE_down							geneM1
Atp6v1b2	ATP6V1B2	0.15753	0.00881145	0.0497919	NOT_DGE	UpReg										geneM1
Atp6v1c1	ATP6V1C1	0.110977	0.000437564	0.00753017	NOT_DGE	UpReg			ASD.DGE_down							geneM1
Atp6v1d	ATP6V1D	0.0972946	0.0476042	0.141876	NOT_DGE	UpReg																																											geneM9
Atp6v1e1	ATP6V1E1	-0.0886124	0.0438167	0.134788	NOT_DGE	DownReg			ASD.DGE_down							geneM1
Atp6v1f	ATP6V1F	-0.330526	0.0340081	0.114555	NOT_DGE	DownReg						BD.DGE_up																														geneM33
Atp6v1g1	ATP6V1G1	-0.12603	0.00785474	0.0462041	NOT_DGE	DownReg								SCZ.DGE_up	geneM0
Atp6v1g2	ATP6V1G2	0.00522355	0.898234	0.93675	NOT_DGE	UpReg						BD.DGE_up				geneM1
Atp6v1h	ATP6V1H	0.209418	0.0430066	0.133296	NOT_DGE	UpReg						BD.DGE_up		SCZ.DGE_up																																			geneM9
Atp7a	ATP7A	0.00411632	0.699559	0.805993	NOT_DGE	UpReg																					geneM2
Atp8a1	ATP8A1	0.187254	0.000574841	0.00907193	NOT_DGE	UpReg		ASD																			geneM2
Atp8a2	ATP8A2	0.217271	0.00171328	0.0180555	NOT_DGE	UpReg										geneM1
Atp8b1	ATP8B1	0.0603255	0.180335	0.332879	NOT_DGE	UpReg									geneM0
Atp8b2	ATP8B2	0.33293	0.0427644	0.132998	NOT_DGE	UpReg									geneM0
Atp9a	ATP9A	0.127126	0.0594746	0.162482	NOT_DGE	UpReg										geneM1
Atp9b	ATP9B	0.186366	0.010216	0.0540849	NOT_DGE	UpReg								SCZ.DGE_up	geneM0
Atpaf1	ATPAF1	-0.0804425	0.22448	0.385101	NOT_DGE	DownReg										geneM1
Atpaf2	ATPAF2	-0.0218338	0.638854	0.762597	NOT_DGE	DownReg																																	geneM30
Atpif1	ATP5IF1	-0.243997	0.0165078	0.0728407	NOT_DGE	DownReg
Atr	ATR	0.0216809	0.639678	0.763079	NOT_DGE	UpReg																																										geneM8
Atraid	ATRAID	-0.0961563	0.000106436	0.00330211	NOT_DGE	DownReg																					geneM2
Atrn	ATRN	0.207624	0.00397908	0.0302046	NOT_DGE	UpReg			ASD.DGE_down							geneM1
Atrnl1	ATRNL1	0.0844592	0.26872	0.43218	NOT_DGE	UpReg		ASD								geneM1
Atrx	ATRX	0.103999	0.0400737	0.127296	NOT_DGE	UpReg	ASD_SC	ASD										geneM11
Atxn10	ATXN10	0.0056249	0.593486	0.726788	NOT_DGE	UpReg																																									geneM7
Atxn1l	ATXN1L	0.227575	0.00431091	0.031788	NOT_DGE	UpReg																																						geneM4
Atxn2	ATXN2	0.0696596	0.0252724	0.0944372	NOT_DGE	UpReg																																									geneM7
Atxn2l	ATXN2L	0.0633025	0.417779	0.57838	NOT_DGE	UpReg																																									geneM7
Atxn3	ATXN3	0.25345	0.017859	0.0765644	NOT_DGE	UpReg							SCZ.DGE_down		geneM0
Atxn3	ATXN3L	0.25345	0.017859	0.0765644	NOT_DGE	UpReg
Atxn7	ATXN7	0.0777211	0.0643896	0.170775	NOT_DGE	UpReg		ASD							geneM0
Atxn7l1	ATXN7L1	-0.0444684	0.294237	0.459247	NOT_DGE	DownReg																																									geneM7
Atxn7l2	ATXN7L2	0.137389	0.0266853	0.0976795	NOT_DGE	UpReg																											geneM25
Atxn7l3	ATXN7L3	0.168012	0.0067606	0.0422299	NOT_DGE	UpReg													geneM12
Atxn7l3b	ATXN7L3B	-0.165386	0.0260521	0.0963323	NOT_DGE	DownReg						BD.DGE_up																																					geneM9
Auh	AUH	0.103065	0.0660098	0.17375	NOT_DGE	UpReg										geneM1
Aup1	AUP1	-0.161925	0.00682187	0.0423082	NOT_DGE	DownReg									geneM0
Aurka	AURKA	-0.0752444	0.408969	0.569951	NOT_DGE	DownReg									geneM0
Auts2	AUTS2	0.227778	0.00757036	0.0453127	NOT_DGE	UpReg	ASD_SC	ASD																														geneM3
Aven	AVEN	-0.242168	0.0248749	0.0932259	NOT_DGE	DownReg							SCZ.DGE_down		geneM0
Avl9	AVL9	0.0263905	0.755063	0.843083	NOT_DGE	UpReg																	geneM16
Avpi1	AVPI1	-0.0909268	0.486658	0.638437	NOT_DGE	DownReg						BD.DGE_up		SCZ.DGE_up		geneM1
Avpr2	AVPR2	-0.261101	0.00913699	0.0508855	NOT_DGE	DownReg									geneM0
AW011738		-0.396484	0.0584075	0.160915	NOT_DGE	DownReg
Axin1	AXIN1	0.117124	0.141608	0.283128	NOT_DGE	UpReg															geneM14
Axin2	AXIN2	0.328233	0.129705	0.267312	NOT_DGE	UpReg																																geneM3
Axl	AXL	-0.124401	0.432518	0.592274	NOT_DGE	DownReg								SCZ.DGE_up																								geneM3
Azi2	AZI2	0.0374708	0.536974	0.681532	NOT_DGE	UpReg									geneM0
Azin1	AZIN1	0.301855	0.0172398	0.0748084	NOT_DGE	UpReg							SCZ.DGE_down		geneM0
Azin2	AZIN2	0.155613	0.0132882	0.0638103	NOT_DGE	UpReg
B2m	B2M	-0.130145	0.709956	0.812664	NOT_DGE	DownReg																																								geneM6
B3galnt1	B3GALNT1	0.345493	0.0207324	0.0834282	NOT_DGE	UpReg																	geneM16
B3galnt2	B3GALNT2	0.12352	0.0132119	0.0636575	NOT_DGE	UpReg									geneM0
B3galt1	B3GALT1	0.0556165	0.210718	0.368786	NOT_DGE	UpReg								SCZ.DGE_up																								geneM3
B3galt2	B3GALT2	0.190065	0.227109	0.387918	NOT_DGE	UpReg							SCZ.DGE_down														geneM2
B3galt4	B3GALT4	-0.122431	0.0730427	0.185302	NOT_DGE	DownReg							SCZ.DGE_down																															geneM4
B3galt5	B3GALT5	-0.0900893	0.401392	0.563357	NOT_DGE	DownReg									geneM0
B3galt6	B3GALT6	-0.0109691	0.863935	0.915008	NOT_DGE	DownReg							SCZ.DGE_down								geneM14
B3gat1	B3GAT1	0.217066	0.000340328	0.00654286	NOT_DGE	UpReg																					geneM2
B3gat2	B3GAT2	-0.0586761	0.215547	0.374556	NOT_DGE	DownReg																																geneM3
B3gat3	B3GAT3	-0.104658	0.0227596	0.0882899	NOT_DGE	DownReg									geneM0
B3glct	B3GLCT	-0.129879	8.09044e-06	0.000670773	NOT_DGE	DownReg
B3gnt4	B3GNT4	-0.303968	0.0090288	0.0504819	NOT_DGE	DownReg										geneM1
B3gnt8	B3GNT8	-0.254233	0.00896827	0.0502318	NOT_DGE	DownReg					BD.DGE_down				geneM0
B3gntl1	B3GNTL1	0.108959	0.311196	0.476579	NOT_DGE	UpReg																																										geneM8
B430218F22Rik		0.160287	0.118138	0.251422	NOT_DGE	UpReg
B430305J03Rik		0.655493	0.0118098	0.0592121	NOT_DGE	UpReg
B4galnt1	B4GALNT1	0.0634995	0.0322696	0.11086	NOT_DGE	UpReg										geneM1
B4galnt4	B4GALNT4	0.105177	0.25269	0.415488	NOT_DGE	UpReg													geneM12
B4galt1	B4GALT1	-0.00498939	0.923476	0.953072	NOT_DGE	DownReg																																							geneM5
B4galt2	B4GALT2	0.222662	0.0151553	0.0689715	NOT_DGE	UpReg									geneM0
B4galt3	B4GALT3	0.0261656	0.746085	0.83747	NOT_DGE	UpReg											geneM10
B4galt4	B4GALT4	-0.0284267	0.479626	0.632605	NOT_DGE	DownReg								SCZ.DGE_up																								geneM3
B4galt5	B4GALT5	0.449178	0.0182104	0.0773667	NOT_DGE	UpReg									geneM0
B4galt6	B4GALT6	0.0570284	0.052699	0.150772	NOT_DGE	UpReg										geneM1
B4galt7	B4GALT7	0.0685259	0.0821199	0.199535	NOT_DGE	UpReg									geneM0
B4gat1	B4GAT1	0.208801	0.0378188	0.122531	NOT_DGE	UpReg						BD.DGE_up		SCZ.DGE_up
B930094E09Rik		0.20039	0.236945	0.398669	NOT_DGE	UpReg
B9d1	B9D1	-0.182626	0.00193119	0.0194187	NOT_DGE	DownReg																																						geneM4
B9d2	B9D2	-0.0620313	0.38245	0.545316	NOT_DGE	DownReg									geneM0
Baalc	BAALC	0.10478	0.101899	0.228574	NOT_DGE	UpReg																																geneM3
Babam1	BABAM1	-0.119127	0.0946076	0.217693	NOT_DGE	DownReg																																										geneM8
Bace1	BACE1	0.0450834	0.179112	0.331149	NOT_DGE	UpReg																					geneM2
Bace2	BACE2	-0.106927	0.116714	0.24968	NOT_DGE	DownReg				ASD.DGE_up																																			geneM5
Bach1	BACH1	0.0102562	0.911141	0.945404	NOT_DGE	UpReg																																								geneM6
Bach2	BACH2	-0.0448559	0.541556	0.685364	NOT_DGE	DownReg																			geneM18
Bad	BAD	-0.114909	0.214248	0.372961	NOT_DGE	DownReg							SCZ.DGE_down						geneM12
Bag1	BAG1	-0.127983	0.0322731	0.11086	NOT_DGE	DownReg									geneM0
Bag2	BAG2	0.133679	0.0200494	0.0817922	NOT_DGE	UpReg											geneM10
Bag3	BAG3	-0.0751852	0.619313	0.747113	NOT_DGE	DownReg				ASD.DGE_up				SCZ.DGE_up																															geneM5
Bag4	BAG4	0.187017	0.0386008	0.124179	NOT_DGE	UpReg										geneM1
Bag5	BAG5	0.223042	0.00263671	0.0236857	NOT_DGE	UpReg									geneM0
Bag6	BAG6	-0.170134	0.000781701	0.0108907	NOT_DGE	DownReg																																									geneM7
Bahcc1	BAHCC1	0.123938	0.159238	0.305783	NOT_DGE	UpReg
Bahd1	BAHD1	0.253438	0.00393526	0.0300279	NOT_DGE	UpReg									geneM0
Baiap2	BAIAP2	-0.0666678	0.438955	0.597934	NOT_DGE	DownReg		ASD								geneM1
Baiap2l2	BAIAP2L2	-0.0586495	0.32556	0.491178	NOT_DGE	DownReg									geneM0
Baiap3	BAIAP3	-0.428148	0.0866508	0.20625	NOT_DGE	DownReg						BD.DGE_up		SCZ.DGE_up	geneM0
Bak1	BAK1	-0.131491	1.26029e-05	0.000856837	NOT_DGE	DownReg									geneM0
Bambi	BAMBI	0.103493	0.584978	0.719486	NOT_DGE	UpReg																					geneM2
Banf1	BANF1	-0.363298	0.0185865	0.0780521	NOT_DGE	DownReg									geneM0
Banp	BANP	0.0996651	0.196068	0.352059	NOT_DGE	UpReg											geneM10
Bap1	BAP1	0.00709192	0.803475	0.878365	NOT_DGE	UpReg													geneM12
Barx2	BARX2	-0.233107	0.000176992	0.00440797	NOT_DGE	DownReg									geneM0
Basp1	BASP1	-0.0428135	0.563028	0.702956	NOT_DGE	DownReg																	geneM16
Bax	BAX	-0.240453	0.00390745	0.0298574	NOT_DGE	DownReg									geneM0
Baz1b	BAZ1B	0.0444178	0.433895	0.593318	NOT_DGE	UpReg												geneM11
Baz2a	BAZ2A	0.0912125	0.0668119	0.17501	NOT_DGE	UpReg																																									geneM7
Baz2b	BAZ2B	-0.0995478	0.17088	0.32073	NOT_DGE	DownReg																																	geneM30
Bbip1		-0.100275	0.0132511	0.0636773	NOT_DGE	DownReg
Bbof1	BBOF1	-0.0904521	0.00148852	0.0164538	NOT_DGE	DownReg			ASD.DGE_down				SCZ.DGE_down
Bbs1	BBS1	0.174532	0.195825	0.351777	NOT_DGE	UpReg														geneM13
Bbs10	BBS10	-0.0512627	0.225886	0.38666	NOT_DGE	DownReg																																	geneM30
Bbs12	BBS12	-0.0801996	0.511979	0.660001	NOT_DGE	DownReg																											geneM25
Bbs2	BBS2	0.0109616	0.918155	0.949584	NOT_DGE	UpReg								SCZ.DGE_up																								geneM3
Bbs4	BBS4	0.166023	0.0346273	0.11591	NOT_DGE	UpReg		ASD																																				geneM4
Bbs5	BBS5	0.229766	0.0113248	0.0576667	NOT_DGE	UpReg									geneM0
Bbs7	BBS7	0.282844	0.0841826	0.202679	NOT_DGE	UpReg			ASD.DGE_down				SCZ.DGE_down			geneM1
Bbs9	BBS9	0.246271	0.0332717	0.112978	NOT_DGE	UpReg									geneM0
Bbx	BBX	-0.0673418	0.469477	0.624007	NOT_DGE	DownReg																					geneM2
BC003965	C16orf91	0.0146017	0.804656	0.878926	NOT_DGE	UpReg									geneM0
BC031181	C18orf32	-0.125697	0.0340154	0.114555	NOT_DGE	DownReg									geneM0
Bcam	BCAM	0.149377	0.00216547	0.0208714	NOT_DGE	UpReg																																geneM3
Bcan	BCAN	-0.141703	0.0613098	0.16547	NOT_DGE	DownReg																																geneM3
Bcap29	BCAP29	-0.105909	0.121033	0.255696	NOT_DGE	DownReg							SCZ.DGE_down			geneM1
Bcap31	BCAP31	-0.195785	0.00139772	0.015931	NOT_DGE	DownReg									geneM0
Bcar1	BCAR1	0.0310094	0.700534	0.806406	NOT_DGE	UpReg																					geneM2
Bcar3	BCAR3	-0.119233	0.0332529	0.112944	NOT_DGE	DownReg				ASD.DGE_up				SCZ.DGE_up																								geneM3
Bcas1	BCAS1	-0.137369	0.478517	0.63194	NOT_DGE	DownReg		ASD					SCZ.DGE_down														geneM2
Bcas2	BCAS2	0.0344528	0.373807	0.537107	NOT_DGE	UpReg									geneM0
Bcas3	BCAS3	-0.00416935	0.942193	0.9634	NOT_DGE	DownReg																					geneM2
Bcat1	BCAT1	-0.0238495	0.801924	0.877257	NOT_DGE	DownReg									geneM0
Bcat2	BCAT2	-0.116254	0.140001	0.281618	NOT_DGE	DownReg								SCZ.DGE_up																									geneM30
Bccip	BCCIP	0.0818442	0.390618	0.553119	NOT_DGE	UpReg				ASD.DGE_up				SCZ.DGE_up			geneM10
Bcdin3d	BCDIN3D	-0.22803	0.101843	0.228513	NOT_DGE	DownReg									geneM0
Bche	BCHE	0.115395	0.668799	0.7845	NOT_DGE	UpReg							SCZ.DGE_down																									geneM3
Bckdha	BCKDHA	-0.155221	0.00328192	0.0268463	NOT_DGE	DownReg								SCZ.DGE_up																								geneM3
Bckdhb	BCKDHB	-0.124697	0.161921	0.309626	NOT_DGE	DownReg								SCZ.DGE_up																								geneM3
Bckdk	BCKDK	-0.0676262	0.157237	0.303729	NOT_DGE	DownReg	ASD_SC	ASD																			geneM2
Bcl10	BCL10	0.121637	0.369725	0.53333	NOT_DGE	UpReg																																geneM3
Bcl11a	BCL11A	0.0119558	0.861972	0.914148	NOT_DGE	UpReg	ASD_SC	ASD	ASD.DGE_down				SCZ.DGE_down		geneM0
Bcl11b	BCL11B	-0.134937	0.302668	0.468021	NOT_DGE	DownReg									geneM0
Bcl2	BCL2	-0.0663431	0.505505	0.654456	NOT_DGE	DownReg		ASD						SCZ.DGE_up																								geneM3
Bcl2a1a	BCL2A1	-0.460588	0.0442042	0.135587	NOT_DGE	DownReg								SCZ.DGE_up																															geneM5
Bcl2l1	BCL2L1	0.0372936	0.0258042	0.0957116	NOT_DGE	UpReg																					geneM2
Bcl2l11	BCL2L11	0.183803	0.0853875	0.20466	NOT_DGE	UpReg								SCZ.DGE_up																																geneM6
Bcl2l13	BCL2L13	0.0128951	0.867929	0.917482	NOT_DGE	UpReg									geneM0
Bcl2l2	BCL2L2	0.142848	0.153275	0.298889	NOT_DGE	UpReg										geneM1
Bcl6	BCL6	0.0443047	0.610633	0.73995	NOT_DGE	UpReg								SCZ.DGE_up																															geneM5
Bcl6b	BCL6B	0.0557588	0.629379	0.754644	NOT_DGE	UpReg																																							geneM5
Bcl7a	BCL7A	0.280775	1.29236e-05	0.000865201	NOT_DGE	UpReg						BD.DGE_up								geneM13
Bcl7b	BCL7B	0.158589	0.000760694	0.0107273	NOT_DGE	UpReg									geneM0
Bcl7c	BCL7C	-0.135786	0.0712591	0.182267	NOT_DGE	DownReg							SCZ.DGE_down																									geneM3
Bcl9	BCL9	-0.00404847	0.86257	0.914248	NOT_DGE	DownReg																																									geneM7
Bcl9l	BCL9L	0.00598047	0.915245	0.94785	NOT_DGE	UpReg									geneM0
Bclaf1	BCLAF1	0.143485	0.112784	0.24448	NOT_DGE	UpReg																						geneM20
Bco2	BCO2	-0.00139059	0.970678	0.982573	NOT_DGE	DownReg										geneM1
Bcor	BCOR	0.0517011	0.00786672	0.0462041	NOT_DGE	UpReg									geneM0
Bcorl1	BCORL1	0.233699	7.14502e-05	0.00255617	NOT_DGE	UpReg																																									geneM7
Bcr	BCR	0.0695494	0.397162	0.559396	NOT_DGE	UpReg																																geneM3
Bcs1l	BCS1L	-0.111212	0.0039687	0.0301804	NOT_DGE	DownReg																								geneM22
Bdh1	BDH1	0.0187241	0.750509	0.8399	NOT_DGE	UpReg																																										geneM8
Bdnf	BDNF	0.0266977	0.719776	0.820493	NOT_DGE	UpReg		ASD					SCZ.DGE_down																geneM21
Bdp1	BDP1	0.0635856	0.219556	0.379398	NOT_DGE	UpReg												geneM11
Bean1	BEAN1	-0.268986	0.104063	0.231697	NOT_DGE	DownReg									geneM0
Becn1		0.0783762	0.0189304	0.0788974	NOT_DGE	UpReg
Begain	BEGAIN	-0.14082	0.0402598	0.12758	NOT_DGE	DownReg													geneM12
Bend3	BEND3	-0.0503322	0.708801	0.812175	NOT_DGE	DownReg																						geneM20
Bend4	BEND4	0.252083	0.0388403	0.124645	NOT_DGE	UpReg											geneM10
Bend5	BEND5	0.000907629	0.995248	0.997423	NOT_DGE	UpReg										geneM1
Bend6	BEND6	0.054064	0.0878131	0.208004	NOT_DGE	UpReg							SCZ.DGE_down			geneM1
Bend7		0.197378	0.0860647	0.205472	NOT_DGE	UpReg
Bet1		0.273439	0.000140468	0.00391832	NOT_DGE	UpReg
Bet1l	BET1L	-0.000548239	0.993241	0.996374	NOT_DGE	DownReg								SCZ.DGE_up		geneM1
Bex1	BEX1	-0.209461	0.0136854	0.0649306	NOT_DGE	DownReg																																											geneM9
Bex1	BEX2	-0.209461	0.0136854	0.0649306	NOT_DGE	DownReg						BD.DGE_up																																					geneM9
Bex2	BEX1	-0.110967	0.0571773	0.158729	NOT_DGE	DownReg																																											geneM9
Bex2	BEX2	-0.110967	0.0571773	0.158729	NOT_DGE	DownReg						BD.DGE_up																																					geneM9
Bex4	BEX4	-0.152743	0.0180879	0.0771298	NOT_DGE	DownReg																																											geneM9
Bfar	BFAR	-0.0277689	0.674682	0.788493	NOT_DGE	DownReg									geneM0
Bfsp1	BFSP1	-0.0849641	0.811639	0.882762	NOT_DGE	DownReg																																						geneM4
Bfsp2	BFSP2	0.0730285	0.326787	0.492172	NOT_DGE	UpReg
Bgn	BGN	0.000572603	0.99792	0.998782	NOT_DGE	UpReg																																							geneM5
Bhlhb9	BHLHB9	0.200608	0.0767535	0.191463	NOT_DGE	UpReg														geneM13
Bhlhe22	BHLHE22	0.233295	0.310971	0.476515	NOT_DGE	UpReg									geneM0
Bhlhe41	BHLHE41	0.242365	0.0924276	0.214182	NOT_DGE	UpReg																																								geneM6
Bicc1	BICC1	0.149912	0.248326	0.410808	NOT_DGE	UpReg																																geneM3
Bicd1	BICD1	0.0906751	0.418039	0.578551	NOT_DGE	UpReg																					geneM2
Bicd2	BICD2	0.28663	0.0806895	0.197303	NOT_DGE	UpReg									geneM0
Bicdl1	BICDL1	0.139086	0.0484002	0.143008	NOT_DGE	UpReg							SCZ.DGE_down
Bicral	BICRAL	0.238295	0.0918935	0.213534	NOT_DGE	UpReg
Bid	BID	-0.163817	0.0359955	0.118648	NOT_DGE	DownReg									geneM0
Bin1	BIN1	-0.0873634	0.138525	0.279867	NOT_DGE	DownReg		ASD																			geneM2
Bin2	BIN2	-0.163268	0.414975	0.575499	NOT_DGE	DownReg					BD.DGE_down		SCZ.DGE_down																																	geneM6
Bin3	BIN3	-0.0588759	0.463095	0.618831	NOT_DGE	DownReg									geneM0
Birc2	BIRC2	0.0543885	0.500845	0.650674	NOT_DGE	UpReg									geneM0
Birc5	BIRC5	-0.476942	0.0161098	0.0717496	NOT_DGE	DownReg							SCZ.DGE_down		geneM0
Birc6	BIRC6	0.0974719	0.187643	0.342	NOT_DGE	UpReg		ASD					SCZ.DGE_down								geneM14
Blcap	BLCAP	0.037062	0.732103	0.828206	NOT_DGE	UpReg														geneM13
Blm	BLM	-0.141869	0.156573	0.302953	NOT_DGE	DownReg									geneM0
Blmh	BLMH	0.0147777	0.362264	0.52717	NOT_DGE	UpReg																				geneM19
Blnk	BLNK	-0.184902	0.22925	0.390151	NOT_DGE	DownReg					BD.DGE_down		SCZ.DGE_down																																	geneM6
Bloc1s2	BLOC1S2	0.0656267	0.389817	0.552229	NOT_DGE	UpReg																																											geneM9
Bloc1s3	BLOC1S3	-0.0459828	0.278363	0.442573	NOT_DGE	DownReg									geneM0
Bloc1s4	BLOC1S4	0.0206378	0.873321	0.921421	NOT_DGE	UpReg									geneM0
Bloc1s5	BLOC1S5	-0.120407	0.481009	0.633189	NOT_DGE	DownReg									geneM0
Bloc1s5	BLOC1S5-TXNDC5	-0.120407	0.481009	0.633189	NOT_DGE	DownReg
Bloc1s6	BLOC1S6	-0.00475548	0.948428	0.967209	NOT_DGE	DownReg									geneM0
Blvra	BLVRA	-0.131784	0.319746	0.485106	NOT_DGE	DownReg			ASD.DGE_down			BD.DGE_up		SCZ.DGE_up		geneM1
Blvrb	BLVRB	-0.158091	0.0315026	0.109516	NOT_DGE	DownReg				ASD.DGE_up		BD.DGE_up		SCZ.DGE_up	geneM0
Blzf1	BLZF1	0.210039	0.0037813	0.0294538	NOT_DGE	UpReg									geneM0
Bmp1	BMP1	0.126025	0.215306	0.374292	NOT_DGE	UpReg																																	geneM30
Bmp2	BMP2	0.0421246	0.68481	0.795288	NOT_DGE	UpReg																																							geneM5
Bmp2k	BMP2K	0.136237	0.161701	0.309318	NOT_DGE	UpReg																																geneM3
Bmp3	BMP3	0.0630056	0.522811	0.669299	NOT_DGE	UpReg									geneM0
Bmp6	BMP6	0.313442	0.154359	0.299913	NOT_DGE	UpReg																													geneM27
Bmp7	BMP7	0.0215542	0.789785	0.869112	NOT_DGE	UpReg																																geneM3
Bmper	BMPER	0.110336	0.0271939	0.0988641	NOT_DGE	UpReg										geneM1
Bmpr1a	BMPR1A	0.0401013	0.683433	0.794777	NOT_DGE	UpReg								SCZ.DGE_up																								geneM3
Bmpr1b	BMPR1B	-0.0812046	0.552907	0.695164	NOT_DGE	DownReg								SCZ.DGE_up																								geneM3
Bmpr2	BMPR2	0.188817	9.69188e-05	0.00307433	NOT_DGE	UpReg																																									geneM7
Bms1	BMS1	0.253019	0.00736592	0.0445316	NOT_DGE	UpReg																																											geneM9
Bmyc		-0.19561	0.00656706	0.0414411	NOT_DGE	DownReg
Bnip1	BNIP1	-0.293057	0.00013947	0.00389903	NOT_DGE	DownReg									geneM0
Bnip2	BNIP2	0.261273	0.0168388	0.0736973	NOT_DGE	UpReg				ASD.DGE_up																												geneM3
Bnip3	BNIP3	0.0767084	0.0181856	0.0773283	NOT_DGE	UpReg									geneM0
Bnip3l	BNIP3L	0.130209	0.0211588	0.0845022	NOT_DGE	UpReg																					geneM2
Boc	BOC	0.00333526	0.973237	0.984302	NOT_DGE	UpReg								SCZ.DGE_up																								geneM3
Bod1	BOD1	0.0728886	0.0590607	0.161876	NOT_DGE	UpReg								SCZ.DGE_up	geneM0
Bod1	BOD1L2	0.0728886	0.0590607	0.161876	NOT_DGE	UpReg
Bod1l	BOD1L1	-0.164026	0.169678	0.319608	NOT_DGE	DownReg												geneM11
Bok	BOK	0.0639987	0.675066	0.788796	NOT_DGE	UpReg																					geneM2
Bola3	BOLA3	-0.271972	0.00154208	0.0168516	NOT_DGE	DownReg																																										geneM8
Bop1	BOP1	-0.0508582	0.013889	0.0654414	NOT_DGE	DownReg															geneM14
Bora	BORA	0.0420226	0.574782	0.712387	NOT_DGE	UpReg									geneM0
Borcs5	BORCS5	-0.00504278	0.867869	0.917482	NOT_DGE	DownReg
Borcs6	BORCS6	-0.0390895	0.225047	0.385795	NOT_DGE	DownReg
Borcs7	BORCS7	-0.100052	0.106592	0.235514	NOT_DGE	DownReg
Borcs7	BORCS7-ASMT	-0.100052	0.106592	0.235514	NOT_DGE	DownReg
Borcs8	BORCS8	-0.238594	0.0471992	0.141032	NOT_DGE	DownReg
Borcs8	BORCS8-MEF2B	-0.238594	0.0471992	0.141032	NOT_DGE	DownReg
Bpgm	BPGM	-0.0984512	0.037413	0.121682	NOT_DGE	DownReg									geneM0
Bphl	BPHL	0.0542379	0.315581	0.481149	NOT_DGE	UpReg									geneM0
Bpnt1	BPNT1	0.0727469	0.0120272	0.0599005	NOT_DGE	UpReg									geneM0
Bptf	BPTF	-0.177984	0.081391	0.19842	NOT_DGE	DownReg												geneM11
Braf	BRAF	0.19776	0.0081709	0.0474151	NOT_DGE	UpReg	ASD_SC	ASD	ASD.DGE_down							geneM1
Brap	BRAP	0.106495	0.063852	0.170172	NOT_DGE	UpReg									geneM0
Brat1	BRAT1	0.0930053	0.182751	0.335681	NOT_DGE	UpReg															geneM14
Brca2	BRCA2	-0.0884764	0.0771489	0.191921	NOT_DGE	DownReg	ASD_SC	ASD							geneM0
Brcc3	BRCC3	0.039007	0.697094	0.804533	NOT_DGE	UpReg									geneM0
Brd1	BRD1	0.25935	6.72099e-05	0.00245529	NOT_DGE	UpReg															geneM14
Brd2	BRD2	0.121777	0.19531	0.351194	NOT_DGE	UpReg							SCZ.DGE_down																																		geneM7
Brd3	BRD3	-0.141822	0.0663601	0.174329	NOT_DGE	DownReg																					geneM2
Brd4	BRD4	-0.137177	0.109021	0.239093	NOT_DGE	DownReg																																									geneM7
Brd7	BRD7	0.120155	0.0353271	0.117422	NOT_DGE	UpReg							SCZ.DGE_down														geneM2
Brd8	BRD8	0.116987	0.183595	0.336648	NOT_DGE	UpReg																																											geneM9
Brd9	BRD9	-0.0448143	0.324809	0.490395	NOT_DGE	DownReg									geneM0
Brdt	BRDT	0.00681068	0.910157	0.944923	NOT_DGE	UpReg
Bre		0.0522125	0.289529	0.454611	NOT_DGE	UpReg
Brf1	BRF1	0.158253	0.0483705	0.142978	NOT_DGE	UpReg															geneM14
Brf2	BRF2	-0.132877	0.0156192	0.0703697	NOT_DGE	DownReg						BD.DGE_up			geneM0
Bri3	BRI3	-0.00758	0.881216	0.927115	NOT_DGE	DownReg									geneM0
Bri3bp	BRI3BP	0.008718	0.556009	0.697753	NOT_DGE	UpReg									geneM0
Bricd5	BRICD5	0.0087058	0.85295	0.908138	NOT_DGE	UpReg																																										geneM8
Brinp1	BRINP1	0.157213	0.218535	0.377942	NOT_DGE	UpReg		ASD							geneM0
Brinp3	BRINP3	0.135902	0.375412	0.538055	NOT_DGE	UpReg																																geneM3
Brix1	BRIX1	-0.03753	0.580697	0.716298	NOT_DGE	DownReg																						geneM20
Brk1	BRK1	-0.118043	0.0536493	0.152496	NOT_DGE	DownReg									geneM0
Brms1	BRMS1	-0.191028	0.103543	0.230944	NOT_DGE	DownReg									geneM0
Brms1l	BRMS1L	0.20545	0.00021968	0.00496329	NOT_DGE	UpReg																																									geneM7
Brox	BROX	0.136132	0.0984921	0.2232	NOT_DGE	UpReg					BD.DGE_down																											geneM3
Brpf1	BRPF1	0.0450123	0.524819	0.671127	NOT_DGE	UpReg				ASD.DGE_up					geneM0
Brpf3	BRPF3	0.0433462	0.538815	0.683041	NOT_DGE	UpReg																																									geneM7
Brsk1	BRSK1	-0.0180348	0.325279	0.490884	NOT_DGE	DownReg			ASD.DGE_down				SCZ.DGE_down						geneM12
Brsk2	BRSK2	0.0872063	0.00263499	0.0236857	NOT_DGE	UpReg													geneM12
Brwd1	BRWD1	0.107512	0.0237334	0.0906847	NOT_DGE	UpReg										geneM1
Brwd3	BRWD3	0.189665	0.00141583	0.0160512	NOT_DGE	UpReg									geneM0
Bscl2	BSCL2	-0.156811	0.00165165	0.0175513	NOT_DGE	DownReg										geneM1
Bsdc1	BSDC1	0.238798	0.0240807	0.0914839	NOT_DGE	UpReg									geneM0
Bsg	BSG	-0.102854	0.182803	0.335729	NOT_DGE	DownReg								SCZ.DGE_up																								geneM3
Bsn	BSN	0.151626	0.000205968	0.00479837	NOT_DGE	UpReg							SCZ.DGE_down			geneM1
Bspry	BSPRY	-0.530659	0.0132238	0.0636773	NOT_DGE	DownReg								SCZ.DGE_up	geneM0
Bst2	BST2	-0.863969	0.0880326	0.208311	NOT_DGE	DownReg				ASD.DGE_up				SCZ.DGE_up																											geneM32
Btaf1	BTAF1	0.202567	0.0449137	0.136872	NOT_DGE	UpReg		ASD																				geneM20
Btbd1	BTBD1	0.138269	0.0955341	0.219101	NOT_DGE	UpReg									geneM0
Btbd11	BTBD11	-0.298834	0.00394457	0.0300798	NOT_DGE	DownReg																									geneM23
Btbd17	BTBD17	-0.0948161	0.353881	0.519248	NOT_DGE	DownReg																																geneM3
Btbd19	BTBD19	-0.160957	0.0450929	0.137319	NOT_DGE	DownReg									geneM0
Btbd2	BTBD2	-0.104615	0.000778528	0.0108584	NOT_DGE	DownReg													geneM12
Btbd6	BTBD6	0.151739	0.0414334	0.130292	NOT_DGE	UpReg													geneM12
Btbd7	BTBD7	0.0417038	0.737284	0.83207	NOT_DGE	UpReg																																geneM3
Btbd8	BTBD8	0.232019	0.00131937	0.0153613	NOT_DGE	UpReg									geneM0
Btbd9	BTBD9	-0.01259	0.860693	0.913247	NOT_DGE	DownReg														geneM13
Btd	BTD	0.0650604	0.603792	0.73467	NOT_DGE	UpReg																					geneM2
Btf3	BTF3	-0.112263	0.12699	0.263112	NOT_DGE	DownReg																																									geneM7
Btf3l4	BTF3L4	0.249981	0.00519492	0.0357858	NOT_DGE	UpReg			ASD.DGE_down				SCZ.DGE_down																																		geneM7
Btg1	BTG1	0.14099	0.252658	0.415488	NOT_DGE	UpReg				ASD.DGE_up		BD.DGE_up		SCZ.DGE_up																															geneM5
Btg2	BTG2	0.227984	0.0966693	0.220522	NOT_DGE	UpReg																																							geneM5
Btg3	BTG3	0.0935105	0.34848	0.514433	NOT_DGE	UpReg						BD.DGE_up		SCZ.DGE_up														geneM20
Btrc	BTRC	0.0125482	0.610024	0.739423	NOT_DGE	UpReg										geneM1
Bub3	BUB3	0.0562667	0.0684177	0.177861	NOT_DGE	UpReg																					geneM2
Bud13	BUD13	0.0290706	0.819099	0.887473	NOT_DGE	UpReg																								geneM22
Bud31	BUD31	-0.116343	0.1936	0.349105	NOT_DGE	DownReg									geneM0
Bysl	BYSL	-0.10696	0.0593229	0.162312	NOT_DGE	DownReg									geneM0
Bzw1	BZW1	0.197712	6.14953e-05	0.00232804	NOT_DGE	UpReg							SCZ.DGE_down												geneM18
Bzw2	BZW2	-0.00210673	0.906361	0.942289	NOT_DGE	DownReg										geneM1
C1d	C1D	0.0571191	0.615166	0.744026	NOT_DGE	UpReg									geneM0
C1galt1	C1GALT1	0.14336	0.00155737	0.0169604	NOT_DGE	UpReg																					geneM2
C1galt1c1	C1GALT1C1	0.451259	0.157633	0.30422	NOT_DGE	UpReg									geneM0
C1qa	C1QA	-0.291792	0.136235	0.276425	NOT_DGE	DownReg																																								geneM6
C1qb	C1QB	-0.358406	0.076809	0.191502	NOT_DGE	DownReg																																								geneM6
C1qbp	C1QBP	-0.127538	0.000207168	0.00481443	NOT_DGE	DownReg									geneM0
C1qc	C1QC	-0.309899	0.112761	0.24448	NOT_DGE	DownReg																																								geneM6
C1ql1	C1QL1	-0.255186	0.0190494	0.0791858	NOT_DGE	DownReg				ASD.DGE_up				SCZ.DGE_up																								geneM3
C1ql2	C1QL2	0.200967	0.285743	0.450279	NOT_DGE	UpReg									geneM0
C1ql3	C1QL3	-0.210007	0.136074	0.276186	NOT_DGE	DownReg									geneM0
C1qtnf1	C1QTNF1	-0.279334	3.33998e-05	0.00153374	NOT_DGE	DownReg																																							geneM5
C1qtnf2	C1QTNF2	-0.44427	0.0603365	0.163992	NOT_DGE	DownReg																									geneM23
C1qtnf4	C1QTNF4	-0.146815	0.244252	0.40682	NOT_DGE	DownReg									geneM0
C1qtnf6	C1QTNF6	-0.110932	0.466801	0.622231	NOT_DGE	DownReg								SCZ.DGE_up																geneM22
C2cd2	C2CD2	0.0537143	0.346887	0.512653	NOT_DGE	UpReg								SCZ.DGE_up		geneM1
C2cd2l	C2CD2L	0.238082	0.00850974	0.0487146	NOT_DGE	UpReg										geneM1
C2cd3	C2CD3	0.31713	0.0238124	0.0909319	NOT_DGE	UpReg									geneM0
C2cd4b		0.0362987	0.884317	0.928249	NOT_DGE	UpReg
C2cd4c	C2CD4C	0.0065032	0.967776	0.981439	NOT_DGE	UpReg																																		geneM31
C2cd5	C2CD5	0.208723	0.134018	0.273279	NOT_DGE	UpReg			ASD.DGE_down																																							geneM8
C3	C3	-0.312165	0.0781297	0.193354	NOT_DGE	DownReg							SCZ.DGE_down																																	geneM6
C3ar1	C3AR1	0.00147796	0.983237	0.990715	NOT_DGE	UpReg							SCZ.DGE_down																																	geneM6
C4b	C4A	-0.416712	0.387061	0.55004	NOT_DGE	DownReg				ASD.DGE_up				SCZ.DGE_up																															geneM5
C4b	C4B	-0.416712	0.387061	0.55004	NOT_DGE	DownReg	ASD_SC	ASD		ASD.DGE_up				SCZ.DGE_up																															geneM5
C730034F03Rik		0.0468384	0.579192	0.715136	NOT_DGE	UpReg
C8g	C8G	-0.113722	0.351815	0.517411	NOT_DGE	DownReg																																						geneM4
CAAA01180111.1		0.0277859	0.69948	0.805993	NOT_DGE	UpReg
Caap1	CAAP1	0.475294	0.00947842	0.0516481	NOT_DGE	UpReg																																geneM3
Cab39	CAB39	0.131444	0.0308377	0.107881	NOT_DGE	UpReg										geneM1
Cab39l	CAB39L	-0.000263582	0.99784	0.998782	NOT_DGE	DownReg							SCZ.DGE_down			geneM1
Cabin1	CABIN1	0.0273637	0.330438	0.495762	NOT_DGE	UpReg										geneM1
Cables1	CABLES1	0.225801	0.248585	0.410989	NOT_DGE	UpReg																																geneM3
Cables2	CABLES2	0.101589	0.0562703	0.157029	NOT_DGE	UpReg																																									geneM7
Cabp1	CABP1	0.0873871	0.716206	0.817493	NOT_DGE	UpReg			ASD.DGE_down							geneM1
Cabp7	CABP7	-0.358339	0.209525	0.367405	NOT_DGE	DownReg																					geneM2
Cabyr	CABYR	-0.186656	0.370863	0.534426	NOT_DGE	DownReg										geneM1
Cacfd1	CACFD1	-0.224995	0.00724181	0.0439694	NOT_DGE	DownReg																																geneM3
Cachd1	CACHD1	0.0921962	0.395419	0.55762	NOT_DGE	UpReg				ASD.DGE_up				SCZ.DGE_up																								geneM3
Cacna1a	CACNA1A	0.0988192	0.217384	0.376875	NOT_DGE	UpReg		ASD								geneM1
Cacna1b	CACNA1B	0.130154	0.0401301	0.127423	NOT_DGE	UpReg		ASD								geneM1
Cacna1c	CACNA1C	0.234216	0.0126417	0.0618816	NOT_DGE	UpReg	ASD_SC	ASD								geneM1
Cacna1d	CACNA1D	0.0553391	0.179288	0.331379	NOT_DGE	UpReg	ASD_SC	ASD					SCZ.DGE_down																																			geneM8
Cacna1e	CACNA1E	0.190762	0.141252	0.282754	NOT_DGE	UpReg	ASD_SC	ASD								geneM1
Cacna1f	CACNA1F	-0.320232	0.151106	0.295698	NOT_DGE	DownReg	ASD_SC	ASD								geneM1
Cacna1g	CACNA1G	0.0228391	0.871365	0.91989	NOT_DGE	UpReg	ASD_SC	ASD					SCZ.DGE_down			geneM1
Cacna1h	CACNA1H	0.0850778	0.477729	0.631575	NOT_DGE	UpReg	ASD_SC	ASD			BD.DGE_down		SCZ.DGE_down		geneM0
Cacna1i	CACNA1I	0.158902	0.249469	0.412002	NOT_DGE	UpReg	ASD_SC	ASD								geneM1
Cacna1s	CACNA1S	-0.320376	0.0203113	0.0824378	NOT_DGE	DownReg										geneM1
Cacna2d2	CACNA2D2	0.162424	0.360837	0.525695	NOT_DGE	UpReg			ASD.DGE_down							geneM1
Cacna2d3	CACNA2D3	0.0953326	0.113871	0.245883	NOT_DGE	UpReg	ASD_SC	ASD	ASD.DGE_down			BD.DGE_up		SCZ.DGE_up		geneM1
Cacna2d4	CACNA2D4	0.192884	0.0471867	0.141032	NOT_DGE	UpReg																																								geneM6
Cacnb1	CACNB1	0.0461165	0.605053	0.735402	NOT_DGE	UpReg			ASD.DGE_down				SCZ.DGE_down			geneM1
Cacnb2	CACNB2	0.125409	0.406784	0.568165	NOT_DGE	UpReg	ASD_SC	ASD						SCZ.DGE_up		geneM1
Cacnb3	CACNB3	-0.00278146	0.960811	0.976169	NOT_DGE	DownReg													geneM12
Cacnb4	CACNB4	0.149692	0.00242384	0.0224413	NOT_DGE	UpReg			ASD.DGE_down							geneM1
Cacng2	CACNG2	-0.0982768	0.459238	0.615543	NOT_DGE	DownReg			ASD.DGE_down				SCZ.DGE_down			geneM1
Cacng3	CACNG3	0.218154	0.131316	0.269498	NOT_DGE	UpReg																																									geneM7
Cacng4	CACNG4	-0.244417	0.0716157	0.182686	NOT_DGE	DownReg							SCZ.DGE_down																									geneM3
Cacng5	CACNG5	-0.260387	0.12437	0.259966	NOT_DGE	DownReg																																						geneM4
Cacng7	CACNG7	0.0209858	0.748451	0.839009	NOT_DGE	UpReg																		geneM17
Cacng8	CACNG8	0.178722	0.170754	0.320541	NOT_DGE	UpReg									geneM0
Cactin	CACTIN	0.011787	0.829862	0.895018	NOT_DGE	UpReg						BD.DGE_up		SCZ.DGE_up							geneM14
Cacul1	CACUL1	0.226758	0.0314518	0.109467	NOT_DGE	UpReg									geneM0
Cacybp	CACYBP	0.0219597	0.413025	0.573539	NOT_DGE	UpReg								SCZ.DGE_up			geneM10
Cad	CAD	-0.0199666	0.745437	0.837259	NOT_DGE	DownReg									geneM0
Cadm1	CADM1	0.123815	0.30951	0.475135	NOT_DGE	UpReg	ASD_SC	ASD																														geneM3
Cadm2	CADM2	0.266352	0.0724191	0.184161	NOT_DGE	UpReg		ASD								geneM1
Cadm3	CADM3	0.0337031	0.570999	0.709427	NOT_DGE	UpReg										geneM1
Cadm4	CADM4	0.117075	0.0504417	0.146577	NOT_DGE	UpReg																					geneM2
Cadps		0.128395	0.00967672	0.0522888	NOT_DGE	UpReg
Cadps2	CADPS2	0.0124724	0.939065	0.961206	NOT_DGE	UpReg	ASD_SC	ASD	ASD.DGE_down							geneM1
Calb1	CALB1	0.0879261	0.490861	0.641862	NOT_DGE	UpReg																																		geneM31
Calb2	CALB2	-0.195132	0.0785865	0.194006	NOT_DGE	DownReg																									geneM23
Calcoco1	CALCOCO1	-0.0649904	0.0480569	0.142557	NOT_DGE	DownReg																											geneM25
Calcrl	CALCRL	0.0673613	0.263005	0.426114	NOT_DGE	UpReg																																geneM3
Cald1	CALD1	-0.0680353	0.238841	0.400746	NOT_DGE	DownReg																																							geneM5
Calhm2	CALHM2	0.000643666	0.992444	0.996109	NOT_DGE	UpReg									geneM0
Calm1	CALM1	0.0653132	0.00346588	0.0276922	NOT_DGE	UpReg										geneM1
Calm2	CALM2	0.220896	9.49835e-06	0.000726571	NOT_DGE	UpReg			ASD.DGE_down				SCZ.DGE_down														geneM2
Calm3	CALM3	0.0555406	0.339183	0.505199	NOT_DGE	UpReg										geneM1
Caln1	CALN1	-0.174581	0.0167943	0.0736377	NOT_DGE	DownReg									geneM0
Calr	CALR	-0.0567664	0.374813	0.537742	NOT_DGE	DownReg											geneM10
Calu	CALU	0.24456	0.131661	0.269892	NOT_DGE	UpReg																																							geneM5
Caly	CALY	-0.274886	0.000406953	0.00723978	NOT_DGE	DownReg						BD.DGE_up		SCZ.DGE_up	geneM0
Camk1	CAMK1	-0.0423133	0.727041	0.824901	NOT_DGE	DownReg									geneM0
Camk1d	CAMK1D	0.159155	0.00461119	0.0333453	NOT_DGE	UpReg										geneM1
Camk1g	CAMK1G	0.171249	0.160835	0.308151	NOT_DGE	UpReg								SCZ.DGE_up		geneM1
[truncated: 11,026 more rows]
[truncated: 14 more columns]
